# Supplementary material for: Attachment Security with Mothers and Fathers: A Meta-Analysis on Mean-Level Differences and Correlations of Verbal Attachment Measures
Source: Springer Nature journal article supplement (doi:10.1007/s10826-023-02585-1), 2023-09-08
Supplement: MOESM1 [file 26018442]

| **Supplement I: Selected Characteristics of the Included Studies** | | | | |
| --- | --- | --- | --- | --- |
|  | Authors | *Number of fathers* | Mean age (in years) | Attachment measure |
|  | Abate et al. (2022) | 560 | 20.4 | Inventory of Parent and Peer Attachment (IPPA; Armsden & Greenberg, 1987) |
|  | Abreu & Simoes (2012) | 56 | 16.1 | IPPA |
|  | Abubakar et al. (2013, adolescents with disabilities) | 151 | 16.1 | IPPA |
|  | Abubakar et al. (2013, no disabilities) | 145 | 17.5 | IPPA |
|  | Abubakar et al. (2014; Arab-Kenyans) | 63 | 16.8 | IPPA |
|  | Abubakar et al. (2014; Asian-Kenyans) | 86 | 16.3 | IPPA |
|  | Afonso (2010) | 162 | 12.6 | Security Scale (KSS; Kerns et al., 1996) |
|  | Agerup et al. (2015) | 242 | 12.6 | IPPA |
|  | Ahmad et al. (2014, lesbian) | 98 |  | IPPA |
|  | Ahmad et al. (2014, heterosexual) | 132 |  | IPPA |
|  | Ahmed (2005, study 3, female controls) | 50 | 16.4 | IPPA |
|  | Ahmed (2005, study 3, female delinquents) | 54 | 16.7 | IPPA |
|  | Ahmed (2005, study 3, male controls) | 50 | 16.4 | IPPA |
|  | Ahmad (2005, study 3, male delinquents) | 91 | 16.7 | IPPA |
|  | Ahmed (2005, study 2, female) | 23 | 16.5 | IPPA |
|  | Ahmed (2005, study 2, male) | 97 | 16.8 | IPPA |
|  | Ahn et al. (2017) | 217 |  | IPPA |
|  | Ajithkumar & Nair (2015) | 186 | 17-20 | IPPA |
|  | Akdeniz et al. (2020) | 873 | 14.7 | IPPA |
|  | Akirmak (2014) | 178 | 21.9 | IPPA |
|  | Al-Yagon (2011) | 203 | . | KSS |
|  | Al-Yagon (2012, learning disability) | 181 | 15.9 | KSS |
|  | Al-Yagon (2012, control group) | 188 | 15.9 | KSS |
|  | Al-Yagon (2014, controls) | 98 | 10.0 | KSS |
|  | Al-Yagon (2014, learning diability) | 107 | 10.0 | KSS |
|  | Al-Yagon (2016, controls) | 99 | 15.9 | KSS |
|  | Al-Yagon (2016, learning disability + ADHS) | 91 | 15.9 | KSS |
|  | Al-Yagon (2016, learning disability) | 90 | 15.9 | KSS |
|  | Al-Yagon (2018, ADHD) | 50 | 11.4 | KSS |
|  | Al-Yagon (2018, controls) | 50 | 11.4 | KSS |
|  | Al-Yagon & Borenstein (2022, ADHD) | 45 | 14.5 | KSS |
|  | Al-Yagon & Borenstein (2022, control group) | 46 | 14.5 | KSS |
|  | Al-Yagoon et al. (in press) | 251 | 10.4 | KSS |
|  | Alexander (1996) | 99 | 16.1 | IPPA |
|  | Alibakshi et al. (2016) | 440 | 15.5 | IPPA |
|  | Allbough (2017) | 514 | 15.3 | IPPA |
|  | Almenara et al. (2016) | 798 | 22.3 | IPPA |
|  | Alonso-Arbiol et al. (2014) | 2129 | 14.5 | IPPA |
|  | Alshehri et al. (2020) | 451 | 14.9 | KSS |
|  | Altınsoy & Eryılmaz (2017) | 411 | 15.9 | IPPA |
|  | Alvarez-Rivera (2006) | 298 | 16.2 | ad-hoc measure |
|  | Amani (2021) | 103 |  | IPPA |
|  | Anand & Anand (2015) | 100 |  | IPPA |
|  | Anastacio & Nobre-Lima (2015) | 344 | 13,36 | IPPA |
|  | Arato (1999, clinical sample) | 17 | 15.8 | Adolescent Attchment Survey (Genius & Violato, 1997) |
|  | Arato (1999, non-clinical sample) | 36 | 14.2 | Adolescent Attchment Survey (Genius & Violato, 1997) |
|  | Armans (2020) | 183 | 14.0 | IPPA |
|  | Asendorpf et al. (1997) | 166 | 21.8 | Beziehungsspezifische Bindungsskalen |
|  | Asendorpf & Wilpers (2000) | 161 | 20.3 | Beziehungsspezifische Bindungsskalen |
|  | Aslani et al. (2013) | 319 |  | IPPA |
|  | Assouline (2015) | 210 | 22.9 | IPPA |
|  | Atkinson (1986) | 79 | 13.5 | Security in Attachment Relationship Scale |
|  | Austin (2010) | 59 | 36.6 | IPPA |
|  | Ayala (2015) | 771 | 24.0 | Parental Attachment Questionnaire (PAQ; Kenny, 1987) |
|  | Ayenew (2020) | 306 |  | IPPA |
|  | Azfar (2020) | 394 | 32.8 | IPPA |
|  | Bablitz (2000) | 200 | . | IPPA |
|  | Bachman et al. (2019, antisocial behavior at clinical level) | 89 | 13.1 | Child Attachment Interview (CAI) |
|  | Bachman et al. (2019; norm sample) | 50 | 14.2 | CAI |
|  | Bachman et al. (2019) | 85 | 11.0 | CAI |
|  | Bachman et al. (2019) | . | 12.8 | CAI |
|  | Bäck (2011) | 80 | 18.0 | Attachment prototypes (Hazen, 1990) |
|  | Bacro (2011, younger group) | 130 | 11.0 | KSS |
|  | Bacro (2011, older group) | 80 | 9.7 | KSS |
|  | Bacro (2012) | 122 | 9.7 | KSS |
|  | Baess (2015) | 229 | 19.2 | IPPA |
|  | Baharudin et al. (2012) | 1349 | 13.5 | IPPA |
|  | Baharudin et al. (2015, urban adolescents) | 480 | 16.5 | IPPA |
|  | Baharudin et al. (2015, rural adolescents) | 394 | 16.5 | IPPA |
|  | Bahvalova (2014) | 89 | . | IPPA |
|  | Balan et al. (2010) | 476 | 14.0 | IPPA |
|  | Ballarotto et al. (2018) | 1105 | 15.0 | IPPA |
|  | Ballarotto et al. (2021) | 372 | 14.5 | IPPA |
|  | Balter (2005) | 244 | 15.2 | Adolescent Attachment Questionnaire (West et al., 1998) |
|  | Bámaca-Colbert et al. (2017) | 127 | 16.2 | IPPA |
|  | Bancali & Sürücü (2011) | 199 | 12.9 | Parent and Friends Attachment Inventory Short Form (Günaydın et al., 2005) |
|  | Banyard & Cantor (2004) | 162 | 18.2 | IPPA |
|  | Barcsi et al. (2017) | 323 | 14.1 | KSS |
|  | Barlow (2003) | 78 | 15.6 | IPPA |
|  | Barrocas (2010) | 24 | 15.1 | IPPA |
|  | Barroso et al. (2017) | 165 | 15.0 | IPPA |
|  | Bar-Zomer & Brunstein Klomek (2018) | 224 | 13.5 | KSS |
|  | Baumel et al. (2016, clinical sample) | 29 | 10.2 | CAI |
|  | Baumel et al. (2016) | 11 | 10.2 | CAI |
|  | Baytemir (2016) | 462 | 15.8 | IPPA |
|  | Beccaria et al. (2022) | 1102 | 15.2 | IPPA |
|  | Becker (2010) | 80 | 16.2 | IPPA |
|  | Bédard et al. (2021) | 17 | 11.8 | CAI |
|  | Beitel & Cecero (2003) | 187 | 19.5 | IPPA |
|  | Bell (2009) | 311 | 16.2 | ad hoc measure |
|  | Bender et al. (2015) | 673 | 11.4 | KSS |
|  | Benoit (2019, female students, school 1) | 588 | . | IPPA |
|  | Benoit (2019, male students, school 1) | 614 | . | IPPA |
|  | Benoit (2019, male students, school 2) | 193 | . | IPPA |
|  | Benoit (2019; female students, school 2) | 182 | . | IPPA |
|  | Berman et al. (1994) | 115 | 19.8 | Continued Attachment Scale (CAS; Berman et al., 1994) |
|  | Berman et al. (1994) | 101 | 19.8 | CAS |
|  | Bessa (2013) | 42 | 9.6 | KSS |
|  | Bettmann & Tucker (2011) | 96 | 16.0 | IPPA |
|  | Bhatt (1989, divorced families) | 59 | 18.5 | IPPA-R |
|  | Bhatt (1989, intact families) | 66 | 18.6 | IPPA-R |
|  | Bigas (2016) | 175 | 10.6 | KSS |
|  | Bilodeau-Houle et al. (2020) | 55 | 9.9 | KSS |
|  | Bishop et al. (2019) | 288 | 18.7 | PAQ |
|  | Bizzi & Pace (2020; control group) | 42 | 10.5 | CAI |
|  | Bizzi et al (2020, controls) | 47 | 12.1 | CAI |
|  | Bizzi et al (2020, headache) | 47 | 12.8 | CAI |
|  | Bizzi et al. (2015a, behavior disorder) | 20 | 11.3 | CAI |
|  | Bizzi et al. (2015a, somatic disorder) | 20 | 11.8 | CAI |
|  | Bizzi et al. (2015b) | 49 | 12.0 | IPPA, KSS |
|  | Bizzi et al. (2018; disruptive behavior disorder) | 42 | 10.8 | CAI |
|  | Bizzi et al. (2018; somatic symptom disorder) | 56 | 12.0 | CAI |
|  | Bizzi, Shmueli-Goetz et al. (2021; control group) | 213 | 11.6 | CAI |
|  | Bizzi, Vedova et al. (2021; control group) | 75 | 12.0 | CAI |
|  | Bizzi, Vedova et al. (2021; diabetes) | 31 | 11.6 | CAI |
|  | Black (1997, friends) | 41 | 15.6 | IPPA |
|  | Black (1997) | 42 | 15.6 | IPPA |
|  | Black & Schutte (2006) | 205 | 19.4 | IPPA |
|  | Black-Hughes & Stacy (2013) | 84 | 33.9 | IPPA |
|  | Blackwood (2014) | 197 | 22.8 | IPPA |
|  | Blain et al. (1993) | 216 | 20.8 | IPPA |
|  | Blazina & Watkins (2000) | 172 | 21.3 | IPPA |
|  | Blehova (2018) | 821 | 22.3 | IPPA |
|  | Blissett et al. (2009) | 206 | 19.8 | PAQ |
|  | Blustein et al. (1991) | 178 | 18.3 | IPPA |
|  | Bobb (2011) | 59 | 23.9 | IPPA |
|  | Bolat et al. (2019) | 144 | 14.6 | IPPA |
|  | Boldt et al. (2014) | 100 | 8.3 | KSS |
|  | Boling et al. (2011) | 108 | 12.7 | PAQ |
|  | Bomester (2012) | 50 | 15.4 | IPPA |
|  | Booth-LaForce et al. (2006) | 68 | 10.2 | KSS |
|  | Borelli & Somers (2016) | 104 | 9.8 | IPPA |
|  | Borelli et al. (2013) | 97 | 10.0 | CAI |
|  | Bosmans et al. (2006) | 55 | 11.0 | IPPA |
|  | Bosmans et al. (2006) | 73 | 11.0 | IPPA |
|  | Bosmans et al. (2006) | 129 | 14.0 | IPPA |
|  | Bosmans et al. (2006) | 139 | 14.0 | IPPA |
|  | Bosmans et al. (2006) | 59 | 17.0 | IPPA |
|  | Bosmans et al. (2006) | 56 | 17.0 | IPPA |
|  | Bosmans et al. (2011) | 469 | 13.9 | IPPA |
|  | Bozanoğlu et al. (2019) | 374 | 16.1 | IPPA |
|  | Brablecová (2012) | 173 | 22.0 | IPPA |
|  | Brack et al. (1993) | 60 | 18.7 | IPPA |
|  | Braga (2018) | 364 | 16.4 | IPPA |
|  | Brager-Larsen et al. (2022) | 103 | 15.9 | IPPA |
|  | Brandes (2018) | 134 | 16.8 | IPPA |
|  | Brenson et al. (1992) | 268 | 19.9 | IPPA |
|  | Broussard (1998) | 138 | 18.4 | IPPA |
|  | Brunstein-Klomek et al. (2017) | 15 | 12.6 | KSS |
|  | Bryant (2015) | 68 | 14.2 | KSS |
|  | Bucx & Seiffge-Krenke (2010) | 380 | 17.7 | PAQ |
|  | Buist et al. (2002) | 35 | 11.0 | IPPA |
|  | Buist et al. (2002) | 44 | 12.0 | IPPA |
|  | Buist et al. (2002) | 48 | 13.0 | IPPA |
|  | Buist et al. (2002) | 50 | 14.0 | IPPA |
|  | Buist et al. (2002) | 35 | 15.0 | IPPA |
|  | Buist et al. (2004) | 288 | 14.5 | IPPA |
|  | Bullock (2017) | 198 | 16.4 | IPPA |
|  | Burack et al. (2013) | 41 | 14.0 | IPPA |
|  | Cameron et al. (2017, sample 1) | 120 | 13.4 | IPPA |
|  | Cameron et al. (2017, sample 2) | 146 | 14.5 | IPPA |
|  | Canestari et al. (2019, younger participants) | 147 | 18.5 | IPPA |
|  | Canestari et al. (2019, older participants) | 164 | 21.7 | IPPA |
|  | Çankaya & Canbulat (2017) | 380 | 11.2 | KSS |
|  | Cankaya & Denizli (2020) | 558 | 21.0 | IPPA |
|  | Cardoso (2019, 3rd-graders) | 106 | 7.6 | KSS |
|  | Cardoso (2019, 4th-graders) | 119 | 8.6 | KSS |
|  | Carter (2011) | 334 | 13.6 | IPPA |
|  | Carter et al. (2014) | 140 | 13.1 | Child Parent Rating Scale (Swanson, 1950) |
|  | Carvalho (2018) | 131 | 22.7 | Questionário de Vinculação ao Pai e à Mãe (QVPM) |
|  | Cavell et al. (1993, "alcoholic fathers") | 71 | 18.6 | IPPA |
|  | Cavell et al. (1993, control condition) | 100 | 18.6 | IPPA |
|  | Cavell et al. (2002) | 95 | 18.7 | IPPA |
|  | Čerešník et al. (2017) | 220 | 12.3 | IPPA |
|  | Čerešník & Baranova (2021, boys) | 194 | 12.7 | IPPA |
|  | Čerešník & Baranova (2021, girls) | 247 | 12,7 | IPPA |
|  | Čerešník & Čerešníkova (2020) | 827 | 12.8 | IPPA |
|  | Chen (2017) | 384 | 15.1 | IPPA |
|  | Chen et al. (2018) | 1955 | 15.1 | IPPA |
|  | Chen et al. (2021) | 374 | 13.9 | IPPA |
|  | Cherrier et al. (2020) | 915 | 23.6 | IPPA |
|  | Cheung (2019) | 223 | 27.4 | IPPA |
|  | Chipuer (2001) | 187 | 10.2 | IPPA |
|  | Cho & Min (2012) | 701 |  | IPPA |
|  | Choi & Kim (2016) | 300 |  | IPPA |
|  | Chou et al. (2013) | 520 | 23.2 | modified from Hazan and Shaver (1987) |
|  | Chrystan (2005) | 396 | 19.8 | IPPA/Continuous Attachment Scale |
|  | Clarke et al. (2020) | 69 | 17.1 | IPPA |
|  | Clemens (2004) | 275 | 19.4 | IPPA |
|  | Cloutier et al. (2022; completers) | 31 | 14.5 | IPPA |
|  | Cloutier et al. (2022 ; dropouts) | 15 | 14.3 | IPPA |
|  | Cohen et al. (2021, low risk) | 15 | 15.2 | IPPA |
|  | Cohen et al. (2021, high risk) | 9 | 14.5 | IPPA |
|  | Coleman (2003) | 67 | 11.1 | IPPA |
|  | Colton et al. (2007) | 91 | 11.7 | IPPA |
|  | Conceição (2010) | 45 | 11.0 | KSS |
|  | Consoli et al. (2018, women) | 100 | 32.2 | QVPM |
|  | Consoli et al. (2018, men) | 100 | 34.7 | QVPM |
|  | Cordeiro (2012) | 760 | 21.3 | QVPM |
|  | Cortes-Garcia et al. (2019, boys) | 457 | 10.8 | IPPA |
|  | Cortes-Garcia et al. (2019, girls) | 447 | 10.8 | IPPA |
|  | Costa (2007) | 74 | 11.3 | IPPA |
|  | Coyl-Shepherd & Newland (2013) | 92 | 9.5 | Children’s Relationship Attitudes (Roggman et al., 2001) |
|  | Cruz (2011) | 36 | 9.6 | KSS |
|  | Cugmas (2011) | 180 | 20.7 | IPPA |
|  | Cunha et al. (2008, anxiety disorder) | 76 | 14.6 | IPPA |
|  | Cunha et al. (2008, control group) | 76 | 14.7 | IPPA |
|  | Cunha et al. (2008, other anxiety disorders) | 28 | 14.3 | IPPA |
|  | Cunha et al. (2009, eating disorder) | 34 | 17.3 | IPPA |
|  | Cunha et al. (2009, control group) | 34 | 17.2 | IPPA |
|  | Cusimano (2013) | 86 | 9.9 | Children’s Coping Strategies Questionnaire |
|  | Danadona (2022) | 250 | 17.5 | IPPA |
|  | Dangaltcheva (2014) | 158 | 15.3 | Parent and Peer Attachment Function questionnaire (PPAF; Moretti, 2003) |
|  | D’Arrisso (2010) | 76 | 13.9 | IPPA |
|  | da Silva (2012) | 252 | 20.8 | QVPM |
|  | da Silva (2014) | 106 | 18.6 | IPPA |
|  | Dandona (2022) | 250 | 17.5 | IPPA |
|  | Danet (2014) | 106 | 35.3 | Attachment Multiple Model Interview |
|  | Daubs (2013) | 57 | 14.5 | IPPA |
|  | Davis (2002) | 16 | 13.7 | IPPA |
|  | de Jong (1992) | 126 | 18.5 | IPPA |
|  | De Koeyer (2001, girls) | 33 | 5.0 | Attachment story completion task |
|  | De Koeyer (2001, boys) | 38 | 5.0 | Attachment story completion task |
|  | De Minzi (2007, school 1) | 90 | 6.0 | KSS (shortened) |
|  | De Minzi (2007, school 2) | 30 | 7.0 | KSS (shortened) |
|  | De Minzi (2007, school 3) | 30 | 6.0 | KSS (shortened) |
|  | De Minzi (2010) | 860 | 10.1 | KSS |
|  | de Oliveira (2005) | 260 | 19.4 | QVPM |
|  | de Sousa (2012) | 298 | 14.9 | QVPM |
|  | De Wit (2013) | 290 | 16.0 | IPPA |
|  | DeBoard-Lucas et al. (2010) | 150 | 10.0 | KSS |
|  | DeFranc & Mahalik (2002) | 204 | 21.3 | PAQ |
|  | Delgado et al. (2016) | 231 | 14.9 | IPPA |
|  | Del Moral-Arroyo et al. (2022) | 306 | 21.4 | IPPA |
|  | Delvecchio (2013) | 2216 | 14.3 | IPPA |
|  | Delveccio et al. (2020) | 303 | 16.9 | IPPA |
|  | Demby et al. (2017) | 86 | 9.9 | Children’s Coping Strategies Questionnaire (CCSQ; Yunger, Corby, & Perry, 2005) |
|  | Demir et al. (2014, blind) | 40 | 12.8 | IPPA |
|  | Demir et al. (2014, sighted) | 40 | 12.8 | IPPA |
|  | Demirdöğen et al. (2021a, girls) | 293 | 13.9 | IPPA |
|  | Demirdöğen et al. (2021a, boys) | 266 | 14.2 | IPPA |
|  | Demirdöğen et al. (2021b, girls) | 391 | 15.2 | IPPA |
|  | Demirdöğen et al., 2021b, boys) | 246 | 15.3 | IPPA |
|  | Demirtaş & Uygun-Eryurt (2020) | 294 | 12.7 | IPPA |
|  | Demirtas-Zorbaz et al. (2018) | 411 | . | IPPA |
|  | Deng et al. (2015) | 857 |  | IPPA |
|  | Dickenson (2015) | 46 | 11.8 | KSS |
|  | Di Folco et al. (2017) | 117 | 6.5 | Manchester Child Attachment Story Test |
|  | Diener et al. (2008) | 126 | 8.4 | KSS |
|  | DiFilippo & Overholser (2000) | 25 | 15.6 | IPPA |
|  | DiFilippo & Overholser (2000) | 34 | 15.6 | IPPA |
|  | Dikmeer et al. (2014) | 40 | 11.0 | KSS |
|  | Dinh et al. (2020) | 222 | 15.8 | IPPA |
|  | Dogan (2016, boys) | 3162 | 15.5 | IPPA |
|  | Dogan (2016, girls) | 2875 | 15.5 | IPPA |
|  | Dogan et al. (2012) | 505 | 14.8 | IPPA |
|  | Dogan et al. (2017) | 50 | 12.8 | IPPA |
|  | Doh (2000) | 768 | 8th-graders | IPPA |
|  | Dolejšová (2014) | 236 | 24.4 | ECR-RS (Fraley et al., 2011) |
|  | Doležalová et al. (in press) | 156 | 15-19 | ECR-RS (Fraley et al., 2011) |
|  | Douglas (2018) | 111 | 21.3 | IPPA |
|  | Doyle et al. (2000) | 216 | . | KSS |
|  | Doyle et al. (2003) | 244 | 13.1 | Relationship Questionnaire (RQ) (Bartolomew & Horowitz, 91) |
|  | Doyle et al. (2009) | 373 | 15.0 | adapted Relationship Questionnaire (Bartholomew & Horowitz, 1991) |
|  | Dreyer (1995) | 64 | 18.5 | IPPA |
|  | Ducharme et al. (2002) | 105 | 15.5 | adapted Relationship Questionnaire (Bartholomew & Horowitz, 1991) |
|  | Duchesne et al. (2009) | 626 | 11.8 | KSS |
|  | Duchesne & Larose (2007) | 121 | 13.0 | IPPA |
|  | Duchesne & Ratelle (2014) | 414 | 11.7 | KSS |
|  | Dujcek (2012) | 362 | 16.0 | IPPA |
|  | Durkin (1990, childrne of alcoholics) | 41 | 7th/8th-graders | IPPA |
|  | Durkin (1990, control group) | 41 | 7th/8th-graders | IPPA |
|  | D’Urso et al. (2020) | 394 | 16.5 | IPPA |
|  | Dursun (2021) | 67 | 14.8 | IPPA |
|  | Dwyer (2005) | 533 | 11.0 | KSS (shortened) |
|  | Dwyer et al. (2010) | 223. | 11.4 | KSS |
|  | Earl & Burns (2009, 10th-graders) | 92 | 14.9 | IPPA |
|  | Earl & Burns (2009, 8th-graders) | 51 | 13.0 | IPPA |
|  | Earl & Burns (2009, 9th-graders) | 61 | 14.0 | IPPA |
|  | Ebbert & Luthar (2021) | 2508 |  | IPPA |
|  | Edwards (2014) | 134 | 30.2 | PAQ |
|  | Elhousseini et al. (2023) | 199 | 8.8 | IPPA |
|  | El Kaaki (2021) | 113 |  | Adult Scale of Parental Attachment (Snow et al., 2005) |
|  | Ellwanger (1994) | 74 | 17.5 | IPPA |
|  | El-Sheikh & Buckhalt (2003, control gr.) | 133 | 9.5 | IPPA |
|  | El-Sheikh & Buckhalt (2003, parents problem drinkers) | 68 | 9.4 | IPPA |
|  | El-Sheik & Elmore-Staton (2004) | 102 | 11.2 | IPPA |
|  | Erdem (2017) | 451 | 16.9 | IPPA |
|  | Esmailzadeh et al. (2021) | 36 | 16.4 | IPPA |
|  | Estevez et al. (2017) | 356 | 15.6 | IPPA |
|  | Estevez et al. (2021) | 599 | 15.3 | IPPA |
|  | Evans (1998) | 134 | 20.2 | IPPA |
|  | Fabbro et al. (2009) | 504 |  | Security and Protection Questionnaire (Calvo, 2002) |
|  | Fabiola et al. (2015) | 49 | 12.0 | IPPA, KSS |
|  | Fall & Shankland (2021) | 195 | 19.6 | IPPA |
|  | Fang (2017) | 415 | 19.7 | questionnaire by Hazan and Shaver (1986) |
|  | Fanti et al. (2008) | 499 |  | IPPA |
|  | Farias (2015) | 46 | 14.0 | IPPA |
|  | Farias (2015) | 46 | 14.0 | IPPA |
|  | Farndale (2005) | 91 | 14.2 | IPPA |
|  | Farnicka & Grzegorzewska (2015) | 120 | 18.7 | IPPA |
|  | Farr et al. (2014) | 167 | 25.0 | IPPA |
|  | Felsman & Bluestein (1999) | 147 | 18.6 | IPPA |
|  | Fermani et al. (2019) | 296 | 24.4 | IPPA |
|  | Fermani et al. (2010, Argentinian sample) | 69 | 19.0 | IPPA |
|  | Fermani et al. (2020, Italian sample) | 71 | 21.9 | IPPA |
|  | Fermani et al. (2021, younger group) | 54 | 12.2 | IPPA |
|  | Fermani et al. (2021, older group) | 37 | 16.5 | IPPA |
|  | Fernandes, F. et al. (2021) | 284 | 16.1 | IPPA |
|  | Fernandes, M. et al. (2021, Portuguese boys) | 131 | 10.8 | KSS |
|  | Fernandes, M. et al. (2021, Portuguese girls) | 154 | 10.7 | KSS |
|  | Fernandes, M. et al. (2021, US boys) | 102 | 11.1 | KSS |
|  | Fernandes, M. et al. (2021, US girls) | 70 | 10.8 | KSS |
|  | Fischer & Good (1998) | 195 | 19.3 | IPPA |
|  | Fitriani & Hastuti (2016) | 157 | 17.0 | IPPA |
|  | Flight (2004) | 33 | 17.1 | IPPA |
|  | Fojanesi et al. (2018) | 27 | 9.5 | KSS |
|  | Formoso et al. (2000) | 284 | 13.3 | IPPA |
|  | Fouladi et al. (2002) | 359 | 21.2 | IPPA |
|  | Fournier et al. (2020) | 14 | 9.0 | CAI |
|  | Fradinha (2012) | 762 | 13.2 | KSS |
|  | Freeze & DiTommaso (2014) | 185 | 45.2 | IPPA |
|  | Freitas et al. (2010) | 837 | 12.2 | KSS |
|  | Fu et al. (2013) | 640 | 11.0 | KSS |
|  | Fuertes et al. (2017) | 269 | 30.2 | IPPA |
|  | Furman & Simon (2004) | 56 | 19.1 | modified AAI |
|  | Gaik et al. (2013) | 300 | 17.5 | measure by Ishak (1999) |
|  | Galarza (2015) | 178 |  | KSS |
|  | Gallarin & Alonso-Arbiol (2012) | 554 | 17.2 | IPPA |
|  | Gambin et al. (2020, boys) | 136 | 16.1 | CAI |
|  | Gambin et al. (2020, girls) | 222 | 15.8 | CAI |
|  | Gambin et al. (2021) | 530 | 16.8 | KSS |
|  | Garcia (2020, girls) | 447 | 10.8 | IPPA |
|  | Garcia (2020, boys) | 457 | 10.8 | IPPA |
|  | Garmon (1999) | 206 | . | IPPA |
|  | Gemeay et al. (2015, Saudi Arabia) | 238 | 20.8 | IPPA |
|  | Gemeay et al. (2015, Egypt) | 245 | 20.3 | IPPA |
|  | Genius & Violato (2000) | 138 | 14.5 | Adolescent Attchment Survey (Genius & Violato, 1997) |
|  | Germeijs & Verschueren (2009) | 281 | 17.2 | IPPA |
|  | Gerrits (2004) | 64 | 7.2/9.0 | Attachment Story Completion Task, KSS |
|  | Gervinskaite-Paulaitiene (2018) | 74 | 8.5 | CAI |
|  | Gervinskaite-Paulaitiene et al. (2016) | 60 | 8.5 | CAI |
|  | Ghahremani et al. (2020) | 400 | 14.5 | IPPA |
|  | Ghiasi et al. (2020) | 500 | 23.5 | measure of Hazan & Shaver (1986) |
|  | Giesling (2013) | 163 | 19.7 | IPPA |
|  | Girgin (2021) | 62 | 10.3 | KSS |
|  | Gloger-Tippelt & Schlager (2017) | 70 | 6.4 | Geschichtenergänzungsverfahren (GEV-B) |
|  | Goldberg & O‘Brien (2005) | 115 | 19.0 | IPPA |
|  | Gomez & McLaren (2007) | 385 | 18.8 | IPPA |
|  | Goncalves (2016) | 234 | 20.4 | QVPM |
|  | Good & Willoughby (2014) | 803 | 16.2 | IPPA |
|  | Goosens et al. (2012) | 601 | 9.0 | KSS |
|  | Granqvist (2002) | 196 | 16.0 | ad-hoc measure (based on Hazan & Shaver) |
|  | Gray & O'Brien (2007) | 409 | 17.3 | IPPA |
|  | Grayson (2010) | 1088 | 15.9 | IPPA |
|  | Grip et al. (2014) | 65 | 10.8 | KSS |
|  | Grogoleva & Prirezova (2021) | 80 |  | IPPA |
|  | Guarnieri et al. (2010) | 784 | 15.1 | IPPA |
|  | Guarnieri et al. (2015) | 385 | 20.4 | IPPA |
|  | Guedes et al. (2018, boys) | 115 | 13.6 | KSS |
|  | Guedes et al. (2018, girls) | 107 | 13.6 | KSS |
|  | Guinn (2015) | 257 | 15.6 | IPPA |
|  | Gunawardena & Schuck (2021) | 233 | 13.2 | IPPA |
|  | Güneydin et al. (2005) | 257 | 20.8 | IPPA |
|  | Gürtepe (2022) | 463 | 9th-12th-graders | IPPA |
|  | Gussoni-Leone (2002) | 345 | 18.2 | IPPA |
|  | Haddock (2011) | 71 | 15.6 | IPPA |
|  | Hagley (2008) | 177 | 19.9 | IPPA |
|  | Hallab & Covic (2010) | 114 | 18.9 | IPPA |
|  | Hammond (1999) | 224 | 14.7 | IPPA |
|  | Han et al. (2017) | 210 | 24.5 | Parent–Adult Attachment Style Questionnaire (Lopez & Hsu, 2002) |
|  | Hannum & Dvorak (2004) | 95 | 18.4 | PAQ |
|  | Hansen (2012) | 644 | . | IPPA |
|  | Haigler et al. (1995) | 218 | 19.0 | IPPA |
|  | Harris (1989) | 280 | 20.1 | IPPA |
|  | Hasanah & Latifah (2021) | 224 | 16.3 | IPPA |
|  | Hebert et al. (2018, girls) | 339 | 9.0 | Modified KSS |
|  | Hebert et al. (2018, boys) | 166 | 8.8 | Modified KSS |
|  | Hellenthal (2006) | 122 | 10.5 | IPPA |
|  | Hellmann (2014) | 110 | 20.8 | IPPA |
|  | Henrique (2017) | 453 | 16.4 | IPPA |
|  | Herdian et al. (2021) |  | 16.5 | IPPA |
|  | Herwandha & Prastuti (2021) | 303 | 20.5 | IPPA |
|  | Higgins et al. (2010) | 383 | 12.0 | ad-hoc measure |
|  | Ho Ming Chong (2007) | 1327 | 13.3 | IPPA |
|  | Holmberg (2000) | 182 | 16.1 | IPPA |
|  | Holtzen et al. (1995) | 133 | 28.6 | PAQ |
|  | Hoseeinzadeh & Khanjani (2016) | 382 |  | IPPA |
|  | Hu & Jiang (2022) | 745 | 12.8 | IPPA |
|  | Huang (2015) | 257 | 13.7 | IPPA |
|  | Hutchinson (2002) | 47 | 18.5 | IPPA |
|  | Hwang (2012) | 86 | 28.6 | IPPA |
|  | Idrees et al. (2021) | 200 | 14.6 | IPPA |
|  | Ince et al. (2020) | 512 | 15.7 | IPPA |
|  | Ingoglia et al. (2020) | 51 | 22.4 | IPPA |
|  | Ingoglia et al. (2020) | 54 | 22.4 | IPPA |
|  | Innamorati et al. (2018) | 375 | 12.6 | KSS |
|  | Intrieri & Margentina (2019, men) | 145 | 21.2 | IPPA |
|  | Intrieri & Margentina (2019, women) | 199 | 20.8 | IPPA |
|  | Irfan & Zulkefy (2021) | 936 | 17.8 | IPPA |
|  | Irvin (2008) | 494 | 19.4 | IPPA |
|  | Isola (2019) | 184 | 18.0 | IPPA |
|  | Ismuni et al. (2012) | 200 | 13-19 | PAQ |
|  | Iwanski et al. (2004) | 1045 | 12.9 | Attachment-Behavior-Representation Questionnaire (Zimmermann, 2004) |
|  | Jager et al. (2015) | 190 | 13.9 | KSS |
|  | Jang & Yoon (2008) | 353 | . | IPPA |
|  | Janssens et al. (2021) | 173 | 14.2 | IPPA |
|  | Jenssens et al. (in press) | 1235 | 13.9 | IPPA |
|  | Jantan et al. (2014) | 420 | 15.5 | IPPA |
|  | Jardin et al. (2017) | 225 | 16.0 | CAI |
|  | Jaureguin & Estevez (2020) | 430. | 15.6 | IPPA |
|  | Jeong & Han (2013, men) | 22 | 21.6 | IPPA |
|  | Jeong & Han (2013, women) | 168 | 21.6 | IPPA |
|  | Jeong et al. (2020) | 268 | 9.4 | IPPA |
|  | Jia et al. (2018) | 115 | 10.5 | IPPA |
|  | Jiang et al. (2017) | 658 | 13.6 | IPPA |
|  | Jičínská (2014) | 191 | 18.0 | IPPA |
|  | Jimoh et al. (2021) | 396 |  | IPPA |
|  | Jin (2015) | 258 | . | IPPA |
|  | Jo et al. (2015) | 299 |  | IPPA |
|  | Johnson (2010) | 94 | 17.1 | IPPA |
|  | Jokschies (2005, controls) | 17 | 21.4 | IPPA |
|  | Jokschies (2005; delinquents) | 18 | 21.2 | IPPA |
|  | Jones (1999) | 251 | 15.7 | IPPA |
|  | Jordan (2007) | 260 | 19.3 | IPPA |
|  | Joseph et al. (2014, control group) | 50 | 14.2 | CAI |
|  | Jung & Kim (2018) | 180 | . | IPPA |
|  | Jung & Kim (2018) | 174 | . | IPPA |
|  | Kaasbøll et al. (2021) | 1266 | 14.9 | IPPA |
|  | Kamkar (2002) | 176 | 15.0 | RQ |
|  | Kamza (2019, boys) | 67 | 10.0 | KSS |
|  | Kamza (2019, girls) | 65 | 10.0 | KSS |
|  | Kamza & Putko (2021) | 160 | 10.3 | KSS |
|  | Kantolić & Perić (2012) | 275 | 16.3 | IPPA |
|  | Kara (2020) | 201 | 17.5 | IPPA |
|  | Karababa (2021) | 406 | 16.0 | IPPA |
|  | Kaur (2021) | 91 | 22.2 | IPPA |
|  | Kaya & Aydin (2021) | 431 | 20.8 | IPPA |
|  | Kaya & Öz (2020) | 700 | 15.2 | IPPA |
|  | Kayastha et al. (2010, study 1) | 40 | 11.1 | KSS |
|  | Kayastha et al. (2010, study 2) | 30 | 10.9 | KSS |
|  | Kayastha et al. (2010; study 3, clinical group) | 30 |  | KSS |
|  | Kayastha et al. (2010, study 3, controls) | 30 |  | KSS |
|  | Kaźmierczak-Mytkowska et al. (2022) | 120 | 11.9 | IPPA |
|  | Keizer et al. (2019, boys) | 266 | 13.6 | IPPA |
|  | Keizer et al. (2019, girls) | 276 | 13.6 | IPPA |
|  | Keller & El-Sheikh (2011) | 176 | 8.7 | IPPA |
|  | Keller et al. (2008) | 124 | 8.7 | IPPA |
|  | Kelley et al. (2010) | 572 | 21.5 | IPPA |
|  | Kennedy (2012) | 78 | 15.6 | IPPA |
|  | Kennedy et al. (2017) | 164 | 23.5 | IPPA |
|  | Kenny et al. (2002) | 100 |  | PAQ |
|  | Kenny et al. (1998) | 253 | . | PAQ |
|  | Keresteš et al. (2019) | 968 | 15.2 | IPPA |
|  | Kerns et al. (2000, 3rd-graders) | 104 | 9.1 | KSS |
|  | Kerns et al. (2000, 5th-graders) | 77 | 11.0 | KSS |
|  | Kerns et al. (2000, 6th-graders) | 72 | 12.1 | KSS |
|  | Kerns et al. (2015) | 107 | 12.0 | modified KSS |
|  | Kerstis et al. (2018) | 3988 |  | Relationship Structures questionnaire (ECR-R) |
|  | Ketterson & Bluestein (1997) | 137 | 19.6 | IPPA |
|  | Khorashadizadeh et al. (2012) | 700 |  | Questionnaire by Hazan & Shaver (1986) |
|  | Khosrojerdi et al. (2019) | 195 | 15.1 | IPPA |
|  | Khosravi et al. (2021) | 200 |  | IPPA |
|  | Kim, B. (2016) | 322 | 21.4 | IPPA |
|  | Kim, B. & Choi (2012) | 297 | . | IPPA |
|  | Kim, E. & Jang (2012) | 531 | . | IPPA |
|  | Kim, H.J. (2011) | 314 | . | IPPA |
|  | Kim, H.S. et al. (2012) | 255 |  | IPPA |
|  | Kim, J.-E. et al. (2013) | 403 | 12.5 | IPPA |
|  | Kim, K. & Kim, K. (2015) | 624 |  | IPPA |
|  | Kim, S. & Kim, J. (2016) | 422 | . | IPPA |
|  | Kim, S. et al. (2014, boys) | 132 | 15.4 | KSS (shortened) |
|  | Kim, S. et al. (2014, girls) | 96 | 15.5 | KSS (shortened) |
|  | Kim, S.J. et al. (2016) | 221 | 18.0 | IPPA |
|  | Kim, S.H. et al. (2018) | 334 | . | IPPA |
|  | Kim, S.H. & Park (2009) | 405 | 16.3 | IPPA |
|  | Kim, Y. et al. (2015) | 428 | . | IPPA |
|  | Kirzildag (2019) | 358 | . | IPPA |
|  | Klomek et al. (2013) | 40 | 12.6 | KSS |
|  | Klomek et al. (2016) | 1691 | . | KSS |
|  | Knabb & Pelletier (2013) | 178 | 18.9 | IPPA |
|  | Knez (2014) | 100 | 32.3 | IPPA |
|  | Kocayörük (2009) | 227 | 16.0 | IPPA |
|  | Kocayörük (2010) | 282 | 16.0 | IPPA |
|  | Kocayörük & Simsek (2016) | 227 | 15.2 | IPPA |
|  | Kochanska et al. (2015) | 84 | 8.3/10.2 | KSS |
|  | Kokkinos et al. (2019) | 518 | 13.7 | KSS |
|  | König et al. (2007) | 31 | 6.6 | Geschichtenergänzungsverfahren (GEV-B) |
|  | Kontrimiené (2018) | 514 | 21.0 | IPPA |
|  | Koo (2012) | 53 | 10.3 | IPPA |
|  | Koški (2016) | 162 | 13.7 | IPPA |
|  | Košutić et al. (2019) | 41 | 18.9 | IPPA |
|  | Košutić et al. (2019) | 30 | 18.9 | IPPA |
|  | Košutić et al. (2019) | 30 | 18.9 | IPPA |
|  | Kotnik (2021) | 249 | 18.7 | IPPA |
|  | Kouvo et al. (2015) | 42 | 11.0 | KSS |
|  | Krol (2015) | 40 | 14.6 | IPPA |
|  | Krstic (2016) | 878 | 14.5 | modified version of Experience in Close Relationships (Brennan, Clark, & Shaver, 1998) |
|  | Kumar & Fonagy (2012) | 127 |  | CAI |
|  | Kumar & Mattanah (2016) | 142 | 19.6 | IPPA |
|  | Kuperminic et al. (1997) | 499 | . | IPPA |
|  | Kurt (2017) | 245 | . | IPPA |
|  | Kusnetsova (2011) | 194 | 14.0 | IPPA |
|  | Kwak (2011) | 339 | . | IPPA |
|  | Kwon | 399 |  | IPPA |
|  | Labrie & Sessoms (2012) | 139 | 18.0 | KSS |
|  | Ladner (2003) | 415 | 20.8 | IPPA |
|  | Lakman & Chalmers (2019) | 248 | 12.0 | IPPA |
|  | Láng & Birkás (2015) | 376 | 17.3 | IPPA |
|  | Langher et al. (2013, patients) | 25 | 11.6 | KSS |
|  | Langher et al. (2013, controls) | 25 | 11.5 | KSS |
|  | Laporta-Herrero et al. (2021, controls) | 129 | 15.4 | IPPA |
|  | Laporta-Herrero et al. (2021, eating disorder) | 131 | 15.3 | IPPA |
|  | Larose & Boivin (1997) | 459 | 17.0 | IPPA |
|  | Larose & Boivin (1998) | 298 | 17.0 | IPPA |
|  | Latiff et al. (2017) | 2925 | 15.0 | IPPA |
|  | Latiff et al. (2018) | 2980 | 14.4 | IPPA |
|  | Laumi & Adiyanti (2012) | 78 |  | IPPA |
|  | Leadbeater et al. (1999, T2) | 460 |  | IPPA |
|  | Lease & Dahlbeck (2009) | 198 | 22.2 | PAQ |
|  | Lee, J. & Kim (2015) | 207 | 20.1 | IPPA |
|  | Lee, J.M. & Bell (2003) | 470 |  | measure by Atkinson (1986) |
|  | Lee, K.-W. et al. (2013) | 254 |  | IPPA |
|  | Lee, P.H. & Shin (2018) | 314 |  | IPPA |
|  | Lee, S. et al. (2009) | 568 |  | Continued Attachment Scale (CAS; Berman et al., 1994) |
|  | Lee, Y.J. & Park (2017) | 454 | 13.4 | IPPA |
|  | Lenkiewicz et al. (2021) | 33 | 16.0 | IPPA |
|  | Leonard et al. (2013) | 481 | 23.0 | IPPA |
|  | Lepojevic & Gutwein (2021) | 507 | 16.7 | IPPA |
|  | Lewis (2007) | 74 | 15.7 | IPPA |
|  | Li, J.B. et al. (2014, Chinese) | 645 | 15.5 | IPPA |
|  | Li, J.B. et al. (2014; Italian) | 641 | 15.5 | IPPA |
|  | Li, J.B. et al. (2016) | 513 | . | IPPA |
|  | Li, J.B. et al. (2019, boys) | 146 | 17.0 | IPPA |
|  | Li, J.B. et al. (2019, girls) | 209 | 17.0 | IPPA |
|  | Li, M. et al. (2021) | 1030 | 13.6 | IPPA |
|  | Li, N. et al. (2009) | 370 | 16.1 | IPPA |
|  | Li, R. et al. (2016) | 767 | 13.0 | IPPA |
|  | Li, X. et al. (2015) | 6301 | 13.1 | IPPA |
|  | Li, Y.L. (2008) | 1289 | 13.2 | Revised Relation Questionnaire-Adolescents (Lin, 2002) |
|  | Liang et al. (2019) | 727 |  | IPPA |
|  | Liberska et al. (2016) | 431 | 17.0 | IPPA |
|  | Lieberman et al. (1999) | 130 | 10.0 | KSS |
|  | Lieberman et al. (1999) | 139 | 10.0 | KSS |
|  | Lieberman et al. (1999) | 125 | 13.0 | KSS |
|  | Lieberman et al. (1999) | 139 | 13.0 | KSS |
|  | Lien (2012) | 916 |  | IPPA |
|  | Lin (2014) | 361 | 12.0 | ad hoc measure |
|  | Lin (2020) | 285 | 20.1 | IPPA |
|  | Lisinskiene & Juskeliene (2019) | 935 | 16.0 | IPPA |
|  | Liu (2006) | 1144 | 14.0 | IPPA |
|  | Liu et al. (2020) | 474 | 16.2 | IPPA |
|  | Lo (2017) | 156 | 15.7 | IPPA |
|  | Loera (2010) | 34 | 19.0 | IPPA |
|  | Loera (2010) | 111 | 22.0 | IPPA |
|  | Long et al. (2018) | 115 | . | IPPA |
|  | Louder (2007, control group) | 181 | . | Attachment and Clinical Issues Questionnaire (Lindsey & Thomas, 03) |
|  | Louder (2007, offenders) | 61 | 19.0 | Attachment and Clinical Issues Questionnaire (Lindsey & Thomas, 03) |
|  | Louro (2013) | 74 | 9.8 | KSS |
|  | Love & Kurpius (2022, abuse survivor) | 74 | 20.3 | IPPA |
|  | Love & Kurpius (2022, control group) | 97 | 20.3 | IPPA |
|  | Lowell et al. (2014) | 424 | 20.7 | IPPA |
|  | Lubenko & Sabre (2007, boys) | 46 | 17.7 | IPPA |
|  | Lubenko & Sabre (2007, girls) | 68 | 17.7 | IPPA |
|  | Luft (1989) | 664 | 19.9 | ad-hoc measure |
|  | Lukas et al. (2022, anorexia nervosa) | 35 | 15.7 | IPPA |
|  | Lukas et al. (2022, control group) | 40 | 15.4 | IPPA |
|  | Luthar & Goldstein (2008, boys) | 133 | 16.0 | IPPA |
|  | Luthar & Goldstein (2008, girls) | 134 | 16.0 | IPPA |
|  | Luthar et al. (2020, school A, boys) | 235 | 16.0 | IPPA |
|  | Luthar et al. (2020, school A, girls) | 226 | 16.0 | IPPA |
|  | Luthar et al. (2020, school B, boys) | 377 | 16.0 | IPPA |
|  | Luthar et al. (2020, school B, girls) | 347 | 16.0 | IPPA |
|  | Luthar et al. (2020, school C, boys) | 219 | 16.0 | IPPA |
|  | Luthar et al. (2020, school C, girls) | 204 | 16.0 | IPPA |
|  | Lyle (2006) | 61 | 22.1 | IPPA |
|  | Ma & Huebner (2008) | 587 | 12.6 | IPPA |
|  | Ma et al. (2011) | 223 | 20.0 | IPPA |
|  | Madureiro (2011) | 736 | 12.2 | KSS |
|  | Magro (2012) | 231 | 14.6 | IPPA |
|  | Maharani (2018) | 200 | 18.6 | IPPA |
|  | Mahzoonien & Yousefi (2017) | 210 | . | modified IPPA |
|  | Maia (2014) | 122 | 17.1 | QVPM |
|  | Maier et al. (2004) | 38 | 21.5 | IPPA |
|  | Maiocchi & Bustamante (2021) | 139 |  | IPPA |
|  | Mancinelli et al. (2021a, Chinese) | 270 | 16.3 | IPPA |
|  | Mancinelli et al. (2021a, Italian) | 279 | 16.3 | IPPA |
|  | Mancinelli et al. (2021a, Polish) | 273 | 16.5 | IPPA |
|  | Mancinelli et al. (2021a, Spanish) | 208 | 16.4 | IPPA |
|  | Mancinelli et al. (2021b) | 453 | 16.5 | IPPA |
|  | Manfroi (2012) | 239 | 10.5 | KSS |
|  | Manhas & Roshan (2015) | 160 | 12-19 | IPPA |
|  | Mansour & Sabeti (2012) | 250 | . | IPPA |
|  | Marcial (2016, male) | 34 | 24.8 | QVPM |
|  | Marcial (2016, female) | 185 | 24.8 | QVPM |
|  | Marcus & Betzer (1996) | 163 | 12.7 | IPPA |
|  | Marcus & Mirle (1990) | 44 | 5.2 | Parent Attachement Structured Interview (Roll et al., 1981) |
|  | Margolese et al. (2005) | 134 | 16.9 | RQ |
|  | Mariano (201) | 405 | 13.8 | KSS |
|  | Marino et al. (2019) | 271 | 17.0 | IPPA |
|  | Markiewicz et al. (2001) | 69 | . | RQ |
|  | Markiwicz et al. (2006, sample 1) | 314 | 13.5 | WHOTO Questionnaire (Hazan et al., 2009) |
|  | Markiwicz et al. (2006, sample 2) | 185 | 17.5 | WHOTO Questionnaire (Hazan et al., 2009) |
|  | Markiwicz et al. (2006, sample 3) | 183 | 24.0 | WHOTO Questionnaire (Hazan et al., 2009) |
|  | Marks (2014) | 98 | 29.8 | IPPA |
|  | Marques (2009) | 255 | 13.0 | IPPA |
|  | Mattanah et al. (2004) | 404 | 20.6 | IPPA |
|  | Mbhalati (2012) | 455 | 14.3 | IPPA |
|  | McAuliffe (2010, intact families) | 287 | 15.9 | IPPA |
|  | McAuliffe (2010, divorced prents) | 200 | 15.9 | IPPA |
|  | McCabe (2017) | 254 | 20.3 | IPPA |
|  | McCarthy et al. (1996) | 103 | 34.0 | IPPA |
|  | McCarthy et al. (2001) | 204 | 20.3 | IPPA |
|  | McCarthy et al. (2004) | 609 | 20.7 | IPPA |
|  | McCarthy et al. (2006) | 390 | 21.0 | IPPA |
|  | McCormick & Kennedy (1994) | 218 | 18.5 | Rocky Mountain Survey (Hazan & Shaver, 1987) |
|  | McGinley & Evans (2020) | 189 | 18.8 | IPPA |
|  | McGinley et al. (2023) | 156 | 19.3 | IPPA |
|  | McKay-Killingbeck (2007) | 146 | 14.5 | IPPA |
|  | McKillop (2012) | 68 | 46.0 | Childhood Attachment Questionnaire (Hazan & Shaver) |
|  | McKinney (2002) | 73 | 20.7 | IPPA |
|  | McNamara et al. (2005) | 322 | 15.8 | IPPA |
|  | McWilliams (2005, pain patients) | 30 | 22.4 | IPPA |
|  | McWilliams (2005) | 278 | 20.0 | IPPA |
|  | Mena (2015) | 128 | 15.0 | IPPA |
|  | Meng et al. (2018) | 942 |  | IPPA |
|  | Mereish (2008) | 205 | 19.3 | IPPA |
|  | Miano et al. (2017) | 218 | 14.4 | IPPA |
|  | Michalčáková et al. (2010) | 289 | 13.2 | IPPA |
|  | Michiels et al. (2010) | 507 | 11.3 | KSS |
|  | Miljkovitch et al. (2015) | 53 | 23.5 | Attachment Multiple Model Interview |
|  | Miljkovitch et al. (2018, patients) | 36 | 16.8 | Attachment Multiple Model Interview |
|  | Miljkovitch et al. (2018, control group) | 30 | 16.3 | Attachment Multiple Model Interview |
|  | Miljkovitch et al. (2022) | 59 | 36.0 | Attachment Multiple Model Interview |
|  | Mogjan et al. (2013) | 158 | . | IPPA |
|  | Mohammadi & Saber (2018) | 459 | 12.9 | IPPA |
|  | Mohammadzadeh et al. (2020) | 1681 | 13-18 | IPPA |
|  | Mohr (1998; substance abuse) | 56 | 15.8 | IPPA |
|  | Mohr (1998) | 55 | 15.8 | IPPA |
|  | Moller et al. (2003) | 241 | 20.6 | IPPA |
|  | Möller & Pillman (2010) | 251 | 11.0 | KSS |
|  | Mónaco et al. (2019) | 1276 | 13.5 | IPPA |
|  | Mónaco et al. (2021) | 700 | 13.6 | IPPA |
|  | Montoya-Castilla et al. (2015, boys) | 292 | 13.7 | IPPA |
|  | Montoya-Castilla et al. (2015, girls) | 303 | 13.6 | IPPA |
|  | Moon & An (2013) | 112 | 11.2 | IPPA |
|  | Morsünbül (2019) | 429 | 20.6 | IPPA |
|  | Mosley et al. (2022) | 479 | 20.5 | IPPA |
|  | Mota (2018) | 227 | 25.6 | QVPM |
|  | Mota & Matos (2009) | 364 | 16.8 | QVPM |
|  | Mothander & Wang (2014, boys) | 240 | 14.0 | IPPA |
|  | Mothander & Wang (2014, girls) | 270 | 14.0 | IPPA |
|  | Moura & Matos, 2008, complete families) | 263 | 15.7 | QVPM |
|  | Moura & Matos (2008, divorced parents) | 47 | 15.7 | QVPM |
|  | Moyano et al. (2020) | 395 | 15.9 | IPPA |
|  | Mubarique (2016) | 200 | 14.4 | KSS |
|  | Mudzkiyyah & Nuriyyatiningrum (2021) | 425 | 15-18 | IPPA |
|  | Mukherjee et al. (2021; gamer) | 150 | 19.9 | IPPA |
|  | Mukherjee et al. (2021; non-gamer) | 150 | 20.0 | IPPA |
|  | Mullen (2013) | 100 | . | IPPA |
|  | Mulvaney & Mebert (2010) | 174 | 19.5 | IPPA |
|  | Muzi et al. (2022, community sample) | 91 | 16.0 | IPPA |
|  | Muzi et al. (2022, institutionalized sample) | 39 | 16.0 | IPPA |
|  | Nabeel & Zafar (2011) | 600 | 17.7 | IPPA |
|  | Nadia & Wijaya (2016) | 245 | 18.2 | IPPA |
|  | Nalbant et al. (2020, eating disorder) | 43 | 15.3 | IPPA |
|  | Nalbant et al. (2020, control group) | 37 | 15.4 | IPPA |
|  | Napoleon (2022) | 102 | 20.8 | IPPA |
|  | Natarajan (2013) | 178 | 13.0 | IPPA |
|  | Natarajan et al. (2011) | 406 | 13.0 | IPPA |
|  | Nejat et al. (2015) | 432 | . | Hazan & Shaver (1986) |
|  | Nelson & Robin (1997) | 133 | 15.6 | IPPA |
|  | Nicholson (1999) | 102 | 16.0 | RQ |
|  | Nickerson et al. (2008) | 105 | 12.2 | KSS |
|  | Nie et al. (2016) | 607 | 14.4 | IPPA |
|  | Nikiforou et al. (2013) | 303 | 11.1 | IPPA |
|  | Nivedha (2014) | 317 | 17.5 | PAQ |
|  | Noom et al. (1999) | 400 | 15.0 | IPPA |
|  | Nunes, F. et al. (2022) | 501 | 15.8 | QVPM |
|  | Nunes, S. et al. (2013) | 289 | 10.5 | KSS |
|  | Nurikhyana et al. (2022) | 251 | 19.9 | IPPA |
|  | Obeldobel & Kerns (2020) | 92 | 11.9 | Friends and Family Interview |
|  | O'Brien (1996) | 282 | 17.3 | IPPA |
|  | O'Brien et al. (2000) | 207 | 22.2 | IPPA |
|  | Offer (1997) | 97 | 36.9 | IPPA |
|  | Öğretir-Özçelik (2017) | 407 |  | IPPA |
|  | Okello et al. (2015) | 267 | 16.4 | IPPA |
|  | Okello et al. (2015) | 284 | 17.0 | IPPA |
|  | Olegario (2009) | 146 | 12.9 | PAQ |
|  | Oliveira & Costa (2005) | 230 | 19.2 | QVPM |
|  | Omidvar et al. (2014) | 785 | 15.7 | IPPA |
|  | Oral & Karababa (2020) | 470 |  | IPPA |
|  | Orloff et al. (2017) | 271 |  | IPPA |
|  | Orzolek-Kronner (2002, eating disorders) | 44 | 16.5 | IPPA |
|  | Orzolek-Kronner (2002, mixed disorders) | 28 | 16.4 | IPPA |
|  | Orzolek-Kronner (2002, control group) | 36 | 16.5 | IPPA |
|  | Özdemir, C. (2012) | 150 |  | KSS |
|  | Özdemir, Y. & Koruklu (2013) | 153 | 12.7 | IPPA |
|  | Özgüle (2011) | 426 | 10.5 | KSS |
|  | Özgüngör (2020) | 377 | . | IPPA |
|  | Pace et al. (2011) | 976 | 15.7 | IPPA |
|  | Paez & Rovella (2019) | 518 | 15.2 | KSS |
|  | Pan et al. (2016) | 1506 | 15.2 | IPPA |
|  | Pan et al. (2017) | 595 | 12.9 | IPPA |
|  | Pao (1996) | 273 | 19.8 | IPPA, PAQ |
|  | Papini et al. (1991) | 231 | 12.8 | IPPA |
|  | Pardo et al. (2006) | 1435 | 16.6 | IPPA |
|  | Parent-Boursier & Hébert (2010) | 79 | 8.9 | KSS |
|  | Parent-Boursier & Hébert (2014) | 97 | 9.8 | KSS |
|  | Parent-Boursier & Hébert (2015) | 142 | 8.8 | KSS |
|  | Park, B. et al. (2017) | 294 | 35.5 | revised Adult Attachment Scale |
|  | Park, K.M. & Kang (2012) | 116 | 5.5 | Attachment Story Completion Task (Bretherton & Cassidy, 1990) |
|  | Park, K.M. & Park (2015) | 47 | 10.9 | IPPA |
|  | Parringon & Kerns (2016) | 559 | 10.0 | Relatedness and Security Questionnaire |
|  | Parsa et al. (2014) | 374 | 18.7 | IPPA |
|  | Pasma (2008) | 157 | 16.2 | IPPA |
|  | Paterson et al. (1994) | 493 | 15.9 | IPPA |
|  | Patowary & Gopalan (2019) | 30 | 15.8 | IPPA |
|  | Pawulan et al. (2018) | 123 | . | IPPA |
|  | Pearce (2009) | 154 | 20.3 | IPPA |
|  | Pearson & Child (2007, Puerto Rico) | 36 | 29.7 | IPPA |
|  | Pearson & Child (2007, USA) | 50 | 23.7 | IPPA |
|  | Pearson & Child (2007; India) | 96 | 20.3 | IPPA |
|  | Penagos et al. (2006) | 1072 | 15-25 | IPPA |
|  | Perrone et al. (2007) | 108 | 31.0 | Continued Attachment Scale (CAS; Berman et al., 1994) |
|  | Peter & Gazelle (2017) | 213 | 10.7 | KSS |
|  | Peterson (2011) | 508 | 20.0 | IPPA |
|  | Piermattei et al. (2017) | 20 | 6.8 | Manchester Child Attachment Story Task |
|  | Pilley (1999) | 28 | 10.0 | CAI |
|  | Pine et al. (2020) | 136 | 14.4 | IPPA |
|  | Pittman & Richmond (2007) | 266 | 18.5 | IPPA |
|  | Polkovnikova-Wamoto (2014) | 19 | 10.4 | CAI |
|  | Ponti & Smorti (2019) | 235 | 24.3 | IPPA |
|  | Portu-Zapirain (2013) | 111 | 5.0 | Attachment Story Completion Task (Verschueren & Marcoen, 1994) |
|  | Potard et al. (2017) | 312 | 13.8 | IPPA |
|  | Potard et al. (2020) | 455 | 15.8 | IPPA |
|  | Pressel (2007) | 546 |  | KSS |
|  | Prijatna & Sanjaya (2021) | 133 | 19.7 | IPPA |
|  | Profe (2016) | 458 | 12.3 | IPPA |
|  | Profe et al. (2021) | 520 | 12.3 | IPPA |
|  | Psychogiou et al. (2018) | 105 | 5.6 | Manchester Child Attachment Story Task |
|  | Purkait (2019) | 100 | 16.5 | IPPA |
|  | Raboteg-Šarić et al. (2018) | 221 | 15.6 | IPPA |
|  | Raiffe & Murphy (2016) | 70 | 19.4 | IPPA |
|  | Raissachelva & Handayani (2020) | 42 | 13.5 | IPPA |
|  | Rajtora (2012) | 212 | 14.1 | IPPA |
|  | Rangarjan (2008) | 515 | 29.7 | IPPA |
|  | Rashwan et al. (2017) | 181 |  | IPPA |
|  | Rasmussen et al. (2022) | 30 |  | CAI |
|  | Ratner (2013) | 264 | 16.1 | IPPA |
|  | Rehman & Butt (2016) | 100 | 16.9 | IPPA |
|  | Reigstad et al. (2006) | 76 | 15.3 | IPPA |
|  | Reigstad et al. (2006) | 129 | 15.6 | IPPA |
|  | Reinert & Edwards (2012) | 305 | 19.3 | Attachment prototypes (Hazen, 1990) |
|  | Remtulla et al. (2012) | 458 | 14.5 | Adolescent Attachment Questionnaire (West et al., 1998) |
|  | Ribeiro (2020) | 148 | 9.8 | KSS |
|  | Riggio (2004) | 566 | 21.4 | PAQ |
|  | Riggio & Valenzela (2011) | 431 | 21.3 | PAQ |
|  | Robinson (2010) | 317 |  | PAQ |
|  | Robinson (2014, younger group) | 42 | 14.4 | IPPA |
|  | Robinson (2014, older group) | 42 | 17.0 | IPPA |
|  | Rocha (2008) | 588 | 17.5 | QVPM |
|  | Röder et al. (2015) | 70 | 10.0 | CAI |
|  | Rodrigues, G. et al. (in press) | 105 | 12.3 | KSS |
|  | Rodrigues, R. (2009) | 30 | 15.9 | IPPA |
|  | Roelofs et al. (2008) | 237 | 9.1 | Relationship Questionnaire for Children (RQ-C, Sharpe et al. 1998) |
|  | Root (2006) | 57 | 13.8 | IPPA |
|  | Roring (2012) | 149 | 18.7 | IPPA |
|  | Rosenberg & Shields (2009) | 31 | 15.3 | IPPA |
|  | Ross & Fuertes (2010) | 295 | 19.4 | IPPA |
|  | Rowen (2014, children of married parents) | 668 |  | IPPA |
|  | Rowen (2014, children of divoced parents) | 326 |  | IPPA |
|  | Rucevic (2010) | 706 | 15.9 | IPPA |
|  | Rucevic & Ajdukovic (2016; community) | 78 | 16.2 | IPPA |
|  | Rucevic & Ajdukovic (2016, referred) | 67 | 16.3 | IPPA |
|  | Ručević & Duvnjak (2010) | 192 | 15.9 | IPPA |
|  | Ryan et al. (1996) | 220 | 23.0 | IPPA |
|  | Saeed & Malik (2022) | 203 | 16.1 | IPPA |
|  | Safdar & Zahrah (2016) | 284 |  | IPPA |
|  | Sahin et al. (2019) | 109 | . | IPPA |
|  | Samper-Garcia et al. (2021) | 563 | 12.7 | IPPA |
|  | Samuolis et al. (2001) | 100 | 18.3 | Continued Attachment Scale—Parent version (Berman et al., 1994) |
|  | Sanders & Szymanski (2013) | 30 | 19.3 | IPPA |
|  | San Martini et al. (2009) | 789 | 15.9 | IPPA |
|  | Santens et al. (2018) | 271 | 14.4 | IPPA (shortened) |
|  | Santona et al. (2019) | 411 | 16.8 | IPPA |
|  | Santos (2021) | 108 | 16.2 | IPPA |
|  | Sanyal et al. (2017) | 230 |  | IPPA |
|  | Sargiani et al. (2013) | 280 | 18.12 | IPPA |
|  | Sarracino et al. (2011) | 169 | 11.8 | KSS |
|  | Savasuk (2013) | 321 | 20.1 | IPPA |
|  | Saylik & Gezici-Yalçın (2018) | 72 | 13.0 | IPPA |
|  | Scharfe (2020) | 219 | 20.5 | RQ |
|  | Schneider & Younger (1996) | 63 |  | IPPA |
|  | Schultheiss & Blustein (1994) | 139 | 19.1 | IPPA |
|  | Schwartz & Bubolz (2004) | 368 | 22.2 | IPPA |
|  | Seah (2015, eating disorder) | 32 | 15.1 | CAI |
|  | Seah (2015, control group) | 25 | 15.0 | CAI |
|  | Sekmen et al. (2017) | 44 | 14.2 | IPPA |
|  | Selby (2000) | 158 | 18.6 | IPPA |
|  | Selçuk et al. (2020) | 1309 | 10.1 | KSS |
|  | Seon (2016) | 1014 | . | IPPA |
|  | Seon (2021) | 298 | 11.0 | IPPA |
|  | Seong & Kim (2015) | 601 | . | IPPA |
|  | Sevinç & Şener-Kılınç (2018) | 237 | 18.5 | IPPA |
|  | Seymenler & Siyez (2016) | 505 | 16.3 | IPPA |
|  | Shaftall et al. (2013) | 111 | 14.5 | IPPA |
|  | Shaftall et al. (2013) | 125 | 14.5 | IPPA |
|  | Sharafat & Zubair (2013) | 300 | 15.5 | PAQ |
|  | Shayeghian et al. (2020) | 150 | 15.0 | IPPA |
|  | Shepherd et al. (2021) | 254 | 21.6 | IPPA |
|  | Shi et al. (2020) | 395 | 23.4 | IPPA |
|  | Shimotomai (2020) | 12 | 14.3 | Attachment to a Parent Scale (Sato, 1993) |
|  | Shimotomai (2020) | 32 | 14.3 | Attachment to a Parent Scale (Sato, 1993) |
|  | Shimotomai (2020) | 43 | 17.3 | Attachment to a Parent Scale (Sato, 1993) |
|  | Shimotomai (2020) | 45 | 17.3 | Attachment to a Parent Scale (Sato, 1993) |
|  | Shimotomai (2020) | 24 | 20.5 | Attachment to a Parent Scale (Sato, 1993) |
|  | Shimotomai (2020) | 37 | 20.5 | Attachment to a Parent Scale (Sato, 1993) |
|  | Shmueli-Goetz et al. (2008) | 210 | 10.9 | CAI |
|  | Shmueli-Goetz et al. (2008) | 100 | 10.4 | CAI |
|  | Shyan & Arshat (2019) | 400 | 23.0 | IPPA |
|  | Sieh et al. (2013, control group) | 112 | 15.0 | items from IPPA |
|  | Sieh et al. (2013, families with ill parents) | 161 | 15.1 | items from IPPA |
|  | Siffert (2012) | 368 | 20.1 | PAQ |
|  | Silva (2011) | 100 | 19.0 | IPPA |
|  | Silva & Costa (2005) | 511 | 20.9 | QVPM |
|  | Silvestre (2019) | 48 | 16.2 | IPPA |
|  | Sim & Ng (2007) | 114 | 17.2 | PAQ |
|  | Sim & Yow (2011) | 130 | 12.6 | measure by Sim & Low (2003) |
|  | Sim & Yow (2011) | 106 | 15.5 | measure by Sim & Low (2003) |
|  | Simons et al. (2001) | 45 | 13.2 | IPPA |
|  | Şimşek & Çöplü (2017) | 259 |  | IPPA |
|  | Sira (2003) | 535 | 19.8 | IPPA |
|  | Sira & Ballard (2009, African American) | 78 | 19.6 | IPPA |
|  | Sira & Ballard (2009, Caucasian) | 231 | 19.6 | IPPA |
|  | Smith (2001) | 253 | 16.5 | IPPA |
|  | Smith (2011) | 60 | 15.7 | IPPA |
|  | Smith-Etxeberria & Eceiza (2021) | 1078 | 21.4 | IPPA |
|  | Soares (2012) | 97 |  | KSS |
|  | Sobral et al. (2010) | 264 | 22.7 | QVPM |
|  | Somers & Paulson (2000) | 157 | 16.2 | IPPA |
|  | Song (2019) | 323 | . | IPPA |
|  | Song et al. (2009, sample 1) | 200 | 13.8 | IPPA |
|  | Song et al. (2009, sample 2) | 114 | 16.7 | IPPA |
|  | Song et al. (2009, sample 3) | 270 | 20.2 | IPPA |
|  | Song et al. (2020) | 179 | 11.5 | IPPA |
|  | Soon (2015) | 97 | 12.2 | CAI |
|  | Sorokou & Weisbrod (2005) | 88 | 18.2 | IPPA |
|  | Sousa (2010) | 218 | 15.3 | IPPA |
|  | Staley (2011) | 73 | 20.1 | IPPA |
|  | Staley (2011) | 95 | 20.3 | IPPA |
|  | Sternberg et al. (2005) | 52 | 15.9 | IPPA |
|  | Sternberg et al. (2005) | 25 | 15.9 | IPPA |
|  | Štětinová (2018) | 71 | 14.9 | IPPA |
|  | Stylianou et al. (2019) | 150 | 16.5 | IPPA |
|  | Suarez-Colorado & Campo-Ariaz (2020) | 142 | 17.7 | IPPA |
|  | Subasi & Yildiz, 2022, community) | 31 | 15.7 | IPPA |
|  | Subasi & Yildiz (2022, institutionalized) | 30 | 18.0 | IPPA |
|  | Sümer & Kağitçibaşi (2010) | 502 | 10.7 | KSS |
|  | Sümer & Sendag (2009) | 194 | 11.3 | KSS |
|  | Sun, Q. et al. (2022) | 1290 | 15.3 | IPPA |
|  | Sun, Y. et al. (2022) | 705 | 15.0 | IPPA |
|  | Sund & Wichstrom (2012) | 2360 | 13.7 | IPPA |
|  | Sutlović & Raboteg-Šarić (2016) | 329 | 16.0 | IPPA |
|  | Syraf (2017) | 50 |  | IPPA |
|  | Szkody & McKinnex (2019) | 402 | 19.6 | IPPA |
|  | Tambelli et al. (2021) | 254 | 22.8 | IPPA |
|  | Tan & Arshat (2019) | 400 | 23.0 | IPPA |
|  | Tao et al. (2020) | 662 | 15.0 | IPPA |
|  | Target et al. (2003) | 175 | 10.8 | CAI |
|  | Taylor (1997) | 264 | 17.0 | IPPA |
|  | Tegegne et al. (2020) | 231 | . | IPPA |
|  | Teixeira (2018) | 364 | 16.4 | IPPA |
|  | Teng et al. (2020) | 432 | 18.2 | IPPA |
|  | Teng et al. (2020) | 620 | 18.2 | IPPA |
|  | Teymoori & Shahrazad (2012) | 202 | 20.6 | IPPA |
|  | Thøgersen et al. (2022) | 159 | 14.7 | IPPA |
|  | Tibbetts & Scharfe (2015) | 392 | 20.6 | Trent Relationship Scales Questionnaire |
|  | Towsend (2004, Caucasian) | 104 | 19.0 | PAQ |
|  | Towsend (2004; Hispanics) | 76 | 19.2 | PAQ |
|  | Touati et al. (2022) | 77 | 26.9 | Attachment Multiple Model Interview |
|  | Traeden (2013) | 60 | 17.3 | KSS |
|  | Trillo & Redondo (2013) | 970 | 15.0 | Index of Attachment to Parents and School (Wong, 2005) |
|  | Tu et al. (2017) | 106 | 13.6 | IPPA |
|  | Tütktan (2004) | 421 | . | IPPA |
|  | Ullrich-French et al. (2011) | 1110 | 20.7 | IPPA |
|  | Urso et al. (2020, boys) | 164 | 16.5 | IPPA |
|  | Urso et al. (2020, girls) | 230 | 16.5 | IPPA |
|  | Utami & Murti (2017) | 104 | 20-30 | IPPA |
|  | Uzaina & Srivastava (2016) | 100 |  | IPPA |
|  | Uzun et al. (2019, control group) | 38 | 14.3 | IPPA |
|  | Vagos et al. (2022) | 279 | 16.6 | IPPA |
|  | Van Berkel et al. (2012) | 123 | 20.3 | IPPA |
|  | van der Vorst et al. (2006) | 520 | 12.3 | IPPA |
|  | van der Vorst et al. (2006) | 492 | 12.3 | IPPA |
|  | van Eijck et al. (2012, boys) | 637 | 13.7 | IPPA |
|  | van Eijck et al. (2012, girls) | 676 | 13.7 | IPPA |
|  | Van Laere (2020) | 522 | 16.4 | KSS |
|  | Varanda (2020) | 123 | . | KSS |
|  | Vaz (2011) | 125 | 16.0 | IPPA |
|  | Vega et al. (2011, eating disorder) | 39 | 14.8 | IPPA |
|  | Vega et al. (2011) | 53 | 14.8 | IPPA |
|  | Vekony et al. (2004) | 62 | 7.0 | Doll Story Completion Task (Verschueren & Marcoen, 1994) |
|  | Vellet (1996) | 73 | 31.6 | modified Hazan & Shaver questionnaire |
|  | Venta (2020) | 100 | 19.0 | IPPA |
|  | Venta & Sharp (2015) | 266 | 15.9 | CAI |
|  | Venta et al. (2014) | 194 | 16.0 | CAI |
|  | Venta et al. (2015) | 189 | 15.4 | CAI |
|  | Venta et al. (2018) | 490 | 15.3 | CAI |
|  | Venta et al. (2018) | 30 | 9.7 | CAI |
|  | Venta et al. (2021) | 1803 | 21.0 | IPPA |
|  | Veppo (2016, Brazilians) | 197 | 26.8 | QVPM |
|  | Veppo (2016, Portuguese) | 175 | 23.0 | QVPM |
|  | Veppo et al. (2020) | 205 | 11.2 | KSS |
|  | Verschueren & Marcoen (1999) | 77 | 5.2 | Attachment Story Completion Task (Verschueren & Marcoen, 1994) |
|  | Verschueren & Marcoen (2002) | 216 | 9.0 | KSS |
|  | Verschueren & Marcoen (2005) | 264 | 8.8, 13.4 | KSS |
|  | Vignoli (2009) | 241 | 16.8 | IPPA |
|  | Vignoli et al. (2005) | 283 | 18.1 | IPPA |
|  | Voss (1999) | 662 | 15.8 | RQ |
|  | Voulgaridou & Kokkinos (2020) | 2207 | 14.0 | KSS |
|  | Wagler (2019) | 21 | 19.3 | IPPA |
|  | Wahab et al. (2013) | 240 | 16.0 | IPPA |
|  | Wallis et al. (2018, control group) | 49 | 14.6 | IPPA |
|  | Wallis et al. (2018; eating disorder) | 54 | 14.6 | IPPA |
|  | Wang, D. et al. (in press) | 284 | 8.9 | IPPA |
|  | Wang, F. et al. (2021) | 668 | 11.3 | IPPA |
|  | Wang, H. et al. (2020) | 242 | 21.9 | IPPA |
|  | Wang, L. et al. (2018) | 2721 | 12.2 | IPPA |
|  | Wang, M. (2009, junior high school) | 283 | 14.0 | IPPA |
|  | Wang, M. (2009, senior high school) | 227 | 17.2 | IPPA |
|  | Wang, Q. (2022) | 872 | 20.3 | IPPA |
|  | Way & Pahl (2001) | 114 | 14.3 | IPPA |
|  | Weber (2017) | 117 | 17.0 | IPPA |
|  | Webster (2002) | 362 | 20.2 | IPPA |
|  | Wei et al. (2021) | 755 | 13.6 | IPPA |
|  | Weierbach (2014) | 256 | 18.6 | IPPA |
|  | Wells & Johnson (2001) | 142 | 19.7 | measure by White et al. (1985) |
|  | Wibowo & Wimbarti (2019) | 31 | 13.5 | IPPA |
|  | Wilkinson (2006) | 615 | 16.4 | IPPA |
|  | Wilkinson (2010) | 495 | 16.4 | IPPA |
|  | Wilkinson & Goh (2014) | 983 | 16.8 | IPPA |
|  | Wilkinson & Parry (2004) | 249 | 16.4 | IPPA |
|  | Williams & Kelly (2005) | 116 | . | KSS |
|  | Williams et al (2017) | 200 | 19.4 | KSS |
|  | Woodhouse et al. (2009) | 189 | 17.0 | Parent as a Secure Base Scale—Revised (Cassidy & Woodhouse, 2003) |
|  | Worobec (2016) | 507 | 21.0 | IPPA |
|  | Wright & Lyon (2021) | 419 | 18.6 | Continued Attachment Scale (CAS; Berman et al., 1994) |
|  | Wristen (1996) | 217 | 20.1 | IPPA |
|  | Wu, C.-L. et al. (2015, autism) | 101 | 13,6 | IPPA |
|  | Wu, C.-L. et al. (2015, controls) | 163 | 13.3 | IPPA |
|  | Wu, C.-L. et al. (2019) | 373 | 13.8 | IPPA |
|  | Wu, Y. et al. (2020) | 650 | 19.0 | IPPA |
|  | Wu, W. (2021) | 813 | 9.4 | IPPA |
|  | Xia et al. (2022) | 326 | 16.3 | IPPA |
|  | Xiao et al. (2022, Mosue) | 317 | 16.5 | IPPA |
|  | Xiao et al. (2022, Han) | 196 | 15.2 | IPPA |
|  | Xie et al. (2022) | 1906 | 14.1 | IPPA |
|  | Yang et al. (2016) | 433 | 19.8 | IPPA |
|  | Yasar (2019) | 463 |  | KSS |
|  | Yau-Evans (2001) | 459 | 10.5 | IPPA |
|  | Yavuz et al. (2019) | 1007 | 15.9 | IPPA |
|  | Yildiz (2016) | 218 | 15.8 | IPPA |
|  | Yildiz (2017) | 567 | 15,8 | IPPA |
|  | Yiri (2020) | 40 | 12.2 | IPPA |
|  | Yoder et al. (2018) | 505 | 16.6 | IPPA |
|  | Yoo et al. (2007) | 505 |  | IPPA |
|  | Yu et al. (2012) | 569 | 20.3 | IPPA |
|  | Yu & Zhou (2002) | 505 |  | KSS |
|  | Zaccagnino et al. (2015, controls) | 35 | 10.7 | CAI |
|  | Zaccagnino et al. (2015, institutionalized) | 18 | 11.3 | CAI |
|  | Zachrisson et al. (2011) | 148 | 11.7 | CAI |
|  | Zagefka et al. (2022; study 1) | 205 | 24.7 | Ad-hoc measure |
|  | Zagefka et al. (2022; study 2) | 697 | 30.1 | Ad-hoc measure |
|  | Zaki et al. (2022) | 364 | 16.4 | IPPA |
|  | Zaman & Fivush (2013) | 65 | 14.4 | Attachment Script Assessment (Waters & Rodrigues-Doolab, 2001) |
|  | Zellmer (2007) | 68 | 8.3 | CAI |
|  | Zhai (2015) | 499 | 10-12 | Youth Attachment to Parents scale |
|  | Zhang, W. et al. (2021) | 664 | 13-17 | IPPA |
|  | Zhang, Y.L. et al. (2011a) | 736 | . | IPPA |
|  | Zhang, Y.L. et al. (2011b) | 497 | . | IPPA |
|  | Zhang, Y.L. et al. (2011b) | 59 | . | IPPA |
|  | Zhao et al. (2022) | 1177 | 15.4 | IPPA (simplified) |
|  | Zhou (2014) | 94 | 19.2 | IPPA |
|  | Zhuyue (2021) | 69 | 15.8 | IPPA |
|  | Zia & Shahzad (2019) | 150 | 13.4 | IPPA |
|  | Zou & Wu (2020) | 808 | 13.7 | IPPA |
|  | Zulkefy et al. (2014) | 2040 | 14.4 | IPPA |
|  | Zulkefly & Wilkinson (2015) | 2040 | 14.3 | IPPA |
|  | Zulkefly & Wilkinson (2017) | 970 | 15.0 | Domain of Adolescent Attachment Scale Malay (Zulkefly & Wilkinson, 2013) |

**Supplement II: References of the Included Studies**

Abate, A., Bailey, C., & Venta, A. (2022). Attachment and social support in Latinx young adults: Investigating the moderating role of familismo. *Journal of Cross-Cultural Psycho*logy, 53(3-4), 327-343. https://doi.org/10.1177/00220221221077378

Abreu, V. F. d. S., & Simoes, S. (2012). *Parallel trajectories: Quality of attachment and behavior in adolescents of a technical and professional school* (in Portuguese) [Unpublished master thesis]. University of Coimbra.

Abubakar, A., Alonso-Arbiol, I., Van de Vijver, F. J. R., Murugami, M., Mazrui, L., & Arasa, J. (2013). Attachment and psychological well-being among adolescents with and without disabilities in Kenya: The mediating role of identity formation. *Journal of Adolescence, 36*(5), 849-857. https://doi.org/10.1016/j.adolescence.2013.05.006

Abubakar, A., Van de Vijver, F. J. R., Mazrui, L., Murugami, M., & Arasa, J. (2014). Connectedness and psychological well-being among adolescents of immigrant background in Kenya. In R. Dimitrova, M. Bender, & F. J. R. Van de Vijver (Eds.), *Global perspectives on well-being in immigrant families* (pp. 95-114). Springer. https://doi.org/10.1007/978-1-4614-9129-3

Afonso, M. C. d. F. (2010). *Quality of attachment and quality of friendship in pre-adolescents* (in Portuguese). [Unpublished master thesis]. ISPA - Instituto Universitário.

Agerup, T., Lydersen, S., Wallander, J., & Sund, A. M. (2015). Associations between parental attachment and course of depression between adolescence and young adulthood. *Child Psychiatry & Human Development, 46*(4), 632–642. https://doi.org/10.1007/s10578-014-0506-y

Ahmad, M. I., Sulaiman, W. S. W., Mokhtar, D. M., Adnan, H. A., & Satar, J. A. (2014). Attachment styles among female adolescents: It’s relationship with coping strategies and life satisfaction between normal and lesbian female adolescents. *Malaysian Online Journal of Counseling, 2*(2), 1-13.

Ahmed, A. (2005). *Attachment and delinquency: A study among incarcerated juvenile in Malaysia* [Unpublished doctoral dissertation] University of Surrey.

Ahn, H. Y., Hyun, H. J., Choi, J. M., Park, S., & Lee, J. (2017). Effects of parental and peer attachment, school adjustment on depression among female middle school students (in Korean). *Journal of the Korean Society of School Health, 27*(3), 140-147. https://doi.org/10.15434/kssh.2014.27.3.140

Ajithkumar, C., & Nair, B.P. (2015). Attachment security, rejection sensitivity and negative automatic thoughts among late adolescent. *International Journal of Life Skills Education, 1*(2), 38-46.

Akdeniz, B., Gunduz, M., Calli, S., Demirdogen, E.S., & Yavuz, M. (2020). Parental attachment and the theory of mind abilities as predictors of internet addiction in Turkish adolescents. *Psychiatry and Clinical Psychopharmacology, 30*(3), 222-229. https://doi.org/ 10.5455/PCP.20200427054916

Akirmak, U. (2014).How is time perspective related to perceptions of self and of interpersonal relationships? *Spanish Journal of Psychology, 17*, e92, 1–11. https://doi.org/10.1017/sjp.2014.92

Al-Yagon, M. (2011). Adolescents’ subtypes of attachment security with fathers and mothers and self-perceptions of socioemotional adjustment. *Psychology, 2*(4), 291-299. https://doi.org/10.4236/psych.2011.24046

Al-Yagon, M. (2012). Adolescents with learning disabilities: Socioemotional and behavioral functioning and attachment relationships with fathers, mothers, and teachers. *Journal of Youth and Adolescence, 41*, 1294–1311. https://doi.org/10.1007/s10964-012-9767-6

Al-Yagon, M. (2014). Child–mother and child–father attachment security: Links to internalizing adjustment among children with learning disabilities. *Child Psychiatry & Human Development, 45*(1), 119–131. https://doi.org/10.1007/s10578-013-0383-9

Al-Yagon, M. (2016). Perceived close relationships with parents, teachers, and peers: Predictors of social, emotional, and behavioral features in adolescents with LD or comorbid LD and ADHD. *Journal of Learning Disabilities, 49*(6), 597-615. https://doi.org/10.1177/0022219415620569

Al-Yagon, M. (2018). Models of child–parent attachment in attention-deficit hyperactivity disorder: Links to executive functions. *Personal Relationships, 25*(2), 280–298. https://doi.org/10.1111/pere.12232

Al-Yagon, M., & Borenstein, T. (2022). Adolescents’ executive functions: Links to inattention, hyperactivity-impulsivity, trait mindfulness, and attachment relationships with fathers and mothers. *Research in Developmental Disabilities, 124*, 104212. https://doi.org/ 10.1016/j.ridd.2022.104212

Al-Yagon, M., Garbi, L., & Rich, Y. (in press). Children's resilience to ongoing border attacks: The role of father, mother, and child resources. *Child Psychiatry & Human Development*. https://doi.org/10.1007/s10578-021-01303-6

Alexander, M. R. (1996). *Problem behavior as a function of attachment relationship*. [Unpublished master thesis]. San Jose State University.

Alibakhshi, S.Z., Alipour, A., Farzad, V., & Aliakbari, M. (2016). Mediating role of emotional eating, self-esteem and self-control in modeling of obesity in adolescent girls. *Journal of Mazandaran University of Medical Sciences, 25*, 193-208.

Allbough, J. L. (2017). *Female adolescent trauma survivors and their parents; Changes in quality of bonds as a predictor of later vulnerability and resilience*. [Unpublished doctoral dissertation]. Miami University.

Almenara, C. A., Umemura, & Macek, P. (2016). Parent-daughter relationships and disorderes eating among emerging adult women. *Studia Psychologica, 58*(3), 216-230. https://doi.org/10.21909/sp.2016.03.718

Alonso-Arbiol, I., Balluerka, N., Gorostiaga, A., Aritzeta, A., Gallarin, M., & Haranburu, M. (2014). Attachment dimensions in adolescence: an adaptation of the Inventory of Parent and Peer Attachment (IPPA) into Basque. *Estudios de Psicología, 35*(2), 359-386. https://doi.org/ 10.1080/02109395.2014.922254

Alshehri, N. A., Yildirim, M., & Vostanis, P. (2020). Saudi adolescents’ report of the relationship between parental factors, social support and mental health problems. *Arab Journal of Psychiatry, 31*(2), 130-143. https://doi.org/10.12816/0056864

Altınsoy, F., & Eryılmaz, A. (2017). School belonging in adolescence: Relationships with life goals and attachment patterns. *International Online Journal of Educational Sciences, 9*(4), 1038 -1051. https://doi.org/10.15345/iojes.2017.04.011

Alvarez-Rivera, L. L. (2006). *Effects of parental attchment to self-control: A look at attachment among Puerto Rican high school students* [Unpublishes master thesis]. University of Florida.

Amani, A. N. A. (2021). Kelekatan Remaja Selama Pandemi Covid-19 [Adolescent attachment during the Covid-19 pandemic]. *Jurnal Pendidikan Tambusai, 5*(2), 3180-3184.

Anand, R., & Anand, M. (2015). Parental modernity and attachment among adolescence. *International Journal of Education & Management, 5*(4), 319-323.

Anastacio, S., & Nobre-Lima, L. (2015). The relationship between mother and father attachment and empathy in early adolescence. *Journal of Child and Adolescent Psychology, 6*(1), 109-122.

Arato, J. (1999). *The effect of childhood attachment on adolescent suicide: A stepwise discriminant analysis* [Unpublished master's thesis]. University of Calgary. https://doi.org/10.11575/PRISM/15448.

Armans, M. (2020). *Peer victimization in affluent communities and the role of parental attachment* [Unpublished dissertation]. Oklahoma State University.

Asendorpf, J. B., Banse, R., Wilpers, S. & Neyer, F. J. (1997). Beziehungsspezifische Bindungsskalen für Erwachsene und ihre Validierung durch Netzwerk-
und Tagebuchverfahren [Relationship-specific attachment scales for adults and validation via network and diary approaches]. *Diagnostica, 43*(4), 289-313.

Asendorpf, J. B., & Wilpers, S. (2000). Attachment security and available support: Closely linked relationship qualities. *Journal of Social and Personal Relationships, 17*(1), 115–138. https://doi.org/10.1177/0265407500171006

Aslani, K., Ghamari, M., Ramezani, S., & Khabazi, M. (2013). Testing the model of mother and father attachment with anxiety and depression with mediating God attachment [in Farsi]. *Family Counseling* *and Psychotherapy*, *3*(3), 419-439.

Assouline, A. A. H. (2015). Adolescents who migrate alone from the former Soviet Union to Israel: Battling the triple challenge. *Child & Adolescent Social Work Journal, 32*(2), 199–208. https://doi.org/10.1007/s10560-014-0342-8

Atkinson, B. (1986). *Attachment, autonomy and social competence in adolescence*. [Unpublished master thesis]. Texas Tech University.

Austin, A. A. (2010). *The role of attachment in the intergenerational transmission of abuse: From childhood victimization to adult re-victimization and distress* [Unpublished dissertation]. University of North Texas.

Ayenew, E. (2021). The effect of perception of early parental attachment experiences on adult romantic attachment style. *American Journal of Applied Psychology, 10*(3), 265-69. https://doi.org/10.11648/j.ajap.20211003.12

Azfar, Z. (2020). *Associations between attachment styles and their subsequent thoughts, feelings, & behaviors in adult heterosexual relationship* [Unpublished dissertation], Adler University.

Ayala, E. E. (2015). *The relationship between attachment and depression: The mediational role of shame, self-esteem, and social support mediational role of shame, self-esteem, and social support*. [Unpublished master thesis]. California State University.

Bablitz, S. A. (2000). *Attachment the construct: A construct validity study of parent-adolescent attachment measures*. [Unpublished master thesis]. University of British Columbia.

Bachmann, C. J., Beecham, J., O’Connor, T. G., Scott, A., Briskman, J., & Scott, S. (2019). The cost of love: financial consequences of insecure attachment in antisocial youth. *Journal of Child Psychology and Psychiatry, 60*(12), 1343–1350. https://doi.org/10.1111/jcpp.13103

Bacro, F. (2011). Validation francophone de l’échelle de sécurité des perceptions d’attachement aupère et à la mère (Kerns, Klepac & Cole, 1996) [French validation of the child-father and child-mother attachment perceptions security scale (Kerns, Klepac, & Cole, 1996)]. *Revue Européenne de Psychologie Appliquée, 61*, 213–221. https://doi.org/10.1016/j.erap.2011.09.003

Bacro, F. (2012). Perceived attachment security to father, academic self-concept and school performance in language mastery. *Journal of Child and Family Studies, 21*(6), 992–1002. https://doi.org/10.1007/s10826-011-9561

Bäck, A. (2011). Effects of parental relations and upbringing
in troubled adolescent wating behaviors. *Eating Disorders, 19*(5), 403-424. https://doi.org/
10.1080/10640266.2011.609091

Baess, K. (2016). *The effect of normal personality, psychopathy and attachment on anti-and prosocial outcomes*. [Unpublished dissertation]. University of Nottingham.

Baharudin, R., Chiah, W., & Zulkefly, N. S. (2012). Perceived paternal and maternal attachment and social emotional adjustments among early adolescents. *International Journal of Asian Social Science, 2*(12), 2114-2127.

Baharudin, R., Zulkefly, N. S., Yahaya, A. N., & Kadri, N. S. M. (2015). Predictors of social responsibility of adolescents from urban and rural areas in Malaysia. *Malaysian Journal of Youth Studies, 13*(29), 9-21.

Bahvalova, J. (2014). *An investigatory study of the relationship between parental attachment, personality and mindful attention in adults*. [Unpublished diploma thesis]. Dublin DBS School of Arts.

Balan, R., Dobrean, A., & Balazsi, R. (2019). Indirect effects of parental and peer attachment on bullying and victimization among adolescents: The role of negative automatic thoughts. *Aggressive Behavior, 44*, 561–570. https://doi.org/10.1002/ab.21775

Ballarotto, G., Volpi, B., Marzilli, E., & Tambelli, R. (2018). Adolescent internet abuse: A study on the role of attachment to parents and peers in a large community sample. *BioMed Research International, 2018*, 5769250. https://doi.org/ 10.1155/2018/5769250

Ballarotto, G., Volpi, B., & Tambelli, R. (2012). Adolescent attachment to parents and peers and the use of Instagram: The mediation role of psychopathological risk. *International Journal of Environmental Research and Public Health, 18*, 3965. https://doi.org/ 10.3390/ijerph18083965

Balter, A.-S. (2005). *Perceived congruent and incongruent attachment to parents and adolescent sex motives* [Unpublished master thesis]. University of British Columbia.

Bámaca-Colbert, M. Y., Tilghman-Osborne, E. M., Calderón-López, S., & Moore, A. M. (2017). Perceptions of support from mothers, fathers, and friends: Direct and indirect associations with the psychological adjustment of Mexican-origin girls. *Journal of Latina/o Psychology, 5*(3), 142–156.https://doi.org/10.1037/lat0000070

Bacanli, F., & Sürücü, M. (2011). Examination of the relations between primary school students’ career development and their attachment to the parents (in Turkish). *Türk Eğitim Bilimleri Dergisi, 9*(4), 679-700.

Banyard, V.L., & Cantor, E.N. (2004). Adjustment to college among trauma survivors: An exploratory study of resilience. *Journal of College Student Development, 45*(2), 207-221.

Barcsi, B., Hollody, K., Peley, B., Dorn, K., Kerns, K. A., Rozsa, S., … Kallai, J. (2017). Security, reliance and availability: Psychometric features of the Kerns’ Security Scale in Hungarian population. *Mentálhigiéné és Pszichoszomatika, 18*(2), 171–193. https://doi.org/10.1556/0406.18.2017.008

Barlow, S. A. (2003). *The relationship of adolescent attachment to parents and peers with therapeutic alliance*. [Unpublished doctoral dissertation] Florida State University.

Barrocas, A. L. (2010). *Adolescent attachment to parents and peers* [Unpublished working paper]. Emory Center for Myths and Rituals in American Life.

Barroso, R., Barbosa‐Ducharne, M., & Coelho, V. (2017). Portuguese adopted adolescents' perception of attachment relationships to parents. *Child and Family Social Work, 23*, 204-211.https://doi.org/10.111/cfs.12401

Bar-Zomer, J., & Brunstein Klomek, A. (2018). Attachment to parents as a moderator in the association between sibling bullying and depression or suicidal ideation among children and adolescents. *Frontiers in Psychiatry, 9*, 72. https://doi.org/10.3389/fpsyt.2018.00072

Baumel, A., Wolmer, L., Laor, N., & Toren, P. (2016). Assessing the use of the Child Attachment Interview in a sample of Israeli Jewish children. *Israel Journal of Psychatry, 53*(3), 56-62.

Baytemir, K. (2016). The mediation of interpersonal competence in the relationship between parent and peer attachment and subjective well-being in adolescence. *Education and Science, 41*, 186, 69-91. https://doi.org/10.15390/EB.2016.6185

Beccaria, F., Scavarda, a., Roggero, A., & Rabaglietti, E. (2022). Protective and risk factors for social withdrawal in adolescence. A mixed-method study of Italian students’ wellbeing. *Modern Italy, 27*, 259–276. https://doi.org/10.1017/mit.2022.10

Becker, S. P. (2010). *Investigating the links between trauma and boys’ delinquency: The role if father-son attachment and alienation*. [Unpublished master thesis]. Miami University.

Bédard, M.-M., Simard, V., & Laverdière, O. (2021). Attachment representations and early maladaptive schemas in children’s and adolescents’ dreams: A pilot study. *Dreaming, 31*(2), 140–163. https://doi.org/10.1037/drm0000168

Beitel, M., & Cecero, J. J. (2003). Predicting psychological mindedness from personality style and attachment security. *Journal of Clinical Psychology, 59*(1), 163–172. https://doi.org/10.1002/jclp.10125

Bell, N. K. (2015). *Parent and adolescent attachment and adolescent shame and hope with psychological control as a mediator*. [Unpublished master thesis]. Brigham Young University.

Bender, P. K., Sømhovd, M., Pons, F., Reinholdt-Dunne, M. L., & Esbjørn, B. H. (2015). The impact of attachment security and emotion dysregulation on anxiety in children and adolescents. *Emotional and Behavioural Difficulties, 20*(2), 189–204. https://doi.org/10.1080/13632752.2014.933510

Benoit, R. L. (2019). *The need to succeed: Pressure and overextension in high achieving schools*. [Unpublished master thesis]. Arizona State University.

# Berman, W. H., Heiss, G. E., & Sperling, M. B. (1994). Measuring continued attachment to parents: The Continued Attachment Scale—Parent Version. *Psychological Reports, 75*(1), 171-182. https://doi.org/10.2466/pr0.1994.75.1.171

Bessa, J. D. P. d. C. (2013). *Security of attachment and perception of parental care in school children* [Unpublished master thesis]. Universidade Lusófona de Humanidades e Tecnologias.

Bettmann, J. E., & Tucker, A. R. (2011). Shifts in attachment relationships: A study of adolescents in wilderness treatment. *Child & Youth Care Forum, 40*(6), 499–519. https://doi.org/10.1007/s10566-011-9146-6

Bhatt, S. A. (1989). *Effects of recent parental divorce, parental conflict, and social support on the social and emotional adjustment of college students*. [Unpublished docotoral dissertation]. University of Iowa.

Bigas, A. R. G. (2016). The relationship between the quality of attachment to parents, self-esteem, and self-concept in pre-adolescents (in Portuguese). [Unpublished master thesis]. ISPA –Instituto Universitário.

Bilodeau-Houle, A., Bouchard, V., Morand-Beaulieu, S., Herringa, R. J., Milad, M. R., & Marin, M.-F. (2020). Anxiety sensitivity moderates the association between father-child relationship security and fear transmission. *Frontiers in Psychology, 11*, 579514. https://doi.org/10.3389/fpsyg.2020.579514

Bishop, D. I., Hansen, A. M., Keil, A. J., & Phoenix, I. V. (2019). Parental attachment and adjustment to college: The mediating role of avoidant coping. *Journal of Genetic Psychology, 180*(1), 31-44. https://doi.org/10.1080/00221325.2019.1577797

Bizzi, F., Castellano, R., & Cavanna, D. (2015b). *Children and early adolescents with somatic symptom disorders: Is attachment investigation a key aspect for the diagnostic and intervention process?* Paper presented at the 23. world congress on psychosomatic medicine, Glasgow.

Bizzi, F., Cavanna, D., Castellano, R., & Pace, C. S. (2015a). Children’s mental representations with respect to caregivers and post-traumatic symptomatology in somatic symptom disorders and disruptive behavior disorders. *Frontiers in Psychology, 6*, 1125. https://doi.org/10.3389/fpsyg.2015.01125

Bizzi, F., & Pace, C. S. (2020). Attachment representations in children with disruptive behavior disorders: A special focus on insecurity in middle childhood. *Clinical Child Psychology and Psychiatry, 25*(4), 833 –846. https://doi.org/10.1177/1359104520918637

Bizzi, F., Riva, A., Mora, S. C., Cavanna, D., & Nacinovich, R. (2020). Attachment representation to caregivers and mentalizing ability in early adolescents with primary headache. *Clinical Psychology & Psychotherapy*. https://doi.org/10.1002/cpp.2540

Bizzi, F., Shmueli-Goetz, Y., Castellano, R., & Cavanna, D. (2018). A multi-assessment approach to attachment in middle childhood and early adolescence in two clinical groups. *Testing, Psychometrics, Methodology, 25*(3), 409-427. https://doi.org/10.4473/TPM25

Bizzi, F., Shmueli-Goetz, Y., Castellano, R., San Martini, P., & Cavanna, D. (2021). Psychometric properties of the Child Attachment Interview in Italian context: A focus on normative and specific clinical groups in school-aged children. *Psychological Reports, 124*(1), 382-410. https://doi.org/10.1177/0033294120905515

Bizzi, F., Vedova, A. M. D., Prandi, E., Cavanna, D., & Manfredi, P. (2021). Attachment representations to parents and emotional-behavioral problems: A comparison between children with type 1 diabetes mellitus and healthy children in middle childhood. *Clinical Child Psychology and Psychiatry, 26*(2), 393-405. https://doi.org/10.1177/1359104520987871

Black, K. A. (1997). *Parallels between adolescent-mother and adolescent-best friend interactions*. [Unpublished doctoral dissertation]. University of New Hampshire.

Black, K. A., & Schutte, E. D. (2006). Recollections of being loved: Implications of childhood experiences with parents for young adults’ romantic relationships. *Journal of Family Issues, 27*(10), 1459-1480. https://doi.org/10.1177/0192513X06289647

Black-Hughes, C., & Stacy, P. D. (2013). Early childhood attachment and its impact on later life resilience: A comparison of resilient and non-resilient female siblings. *Journal of Evidence-Based Social Work, 10*(5), 410-420. https://doi.org/
10.1080/15433714.2012.759456

Blackwood, J. (2014). *Does the timing of divorce matter? Parental divorce, interparental conflict, and young adult well-being*. [Unpublished master thesis]. Towson University.

Blain, M. D., Thompson, J. M., & Whiffen, V. E. (1993). Attachment and perceived social support in late adolescence: The interaction between working models of self and others. *Journal of Adolescent Research, 8*(2), 226-241. https://doi.org/10.1177/074355489382006

Blazina, C., & Watkins, C. E., Jr. (2000). Separation/individuation, parental attachment, and male gender role conflict: Attitudes toward the feminine and the fragile masculine self. Psychology of Men & Masculinity, 1(2), 126–132. https://doi.org/10.1037/1524-9220.1.2.126

Blehova, Z. (2018). *Vliv vztahů srodiči na autonomii, sebehodnocení a jasnost sebepojetí ve vynořující se dospělosti* [The influence of sibling relationships on autonomy, self-esteem and clarity of self-concept in emerging adulthood]. [Unpublished bachelor thesis]. University of Brno.

Blissett, J., Walsh, J., Harris, G., Jones, C., Leung, N., & Meyer, C. (2009). Different core beliefs predict paternal and maternal attachment representations in young women. *Clinical Psychology and Psychotherapy, 13*, 163-173.https://doi.org/ 10.1002/cpp.482

Blustein, D. L., Walbridge, M. M., Friedlander, M. L., & Palladino, D. E. (1991). Contributions of psychological separation and parental attachment to the career development process. *Journal of Counseling Psychology, 38*(1), 39-50. https://doi.org/10.1037/0022-0167.38.1.39

Bobb, T. S. (2011). *Relationship of age, gender, attachment to parent, and race of primary caregiver with biracial identity development among biracial students*. [Unpublished doctoral dissertation]. University of North Carolina at Charlotte.

Bolat, N., Eliacik, K., Yavuz, M., Kanik, A., Mertek, H., Guven, B., Dogrusoz, B., & Bakiler, A.R. (2019). Adolescent mental health, attachment characteristics, and unexplained chest pain: a case–control study. *Psychiatry and Clinical Psychopharmacology, 29*(4), 487-491. https://doi.org/10.1080/24750573.2018.1454374

Boldt, L. J., Kochanska, G., Yoon, J. E., & Nordling, J. K. (2014). Children’s attachment to both parents from toddler age to middle childhood: Links to adaptive and maladaptive outcomes. *Attachment & Human Development, 16*(3), 211-229. https://doi.org/10.1080/14616734.2014.889181

Boling, M. W., Barry, C. M., Kotchik, B. A., & Lowry, J. (2011). Relations among early adolescents’ parent-adolescent attachment, perceived social competence, and friendship quality. *Psychological Reports, 109*(3), 819-841. https://doi.org/10.2466/02.07.09.21.PR0.109.6.819-841

Bomester, O. (2012). Exploring closeness in parent-adolescent relationships in a semi-rural, low-income community in the Western Cape province of South Africa [Unpublished master thesis]. University of Stellenbosch.

Booth-Laforce, C., Oh, W., Kim, A. H., Rubin, K. H., Rose-Krasnor, L. & Burgess, K. (2006). Attachment, self-worth, and peer-group functioning in middle childhood. *Attachment & Human Development, 8*(4), 309–325. https://doi.org/10.1080/14616730601048209

Borelli, J. L., David, D. H., Crowley, M. J., Snavely, J. E., & Mayes, L.C. (2013). Dismissing children’s perceptions of their emotional experience and parental care: Preliminary evidence of positive bias. *Child Psychiatry & Human Development, 44*(1), 70–88. https://doi.org/10.1007/s10578-012-0310-5

Borelli, J. L., & Somers, J. (2016). Associations between attachment narratives and self-report measures of attachment in middle childhood: Extending evidence for the validity of the Child Attachment Interview. *Journal of Child and Family Studies, 25,* 1235-1276. https://doi.org/10.1007/s10826-015-0310-8

Bosmans, G., Braet, C., van Leeuwen, K., & Beyers, W. (2006). Do parenting behaviors predict externalizing behavior in adolescence, or is attachment the neglected third factor? *Journal of Youth and Adolescence, 35*(3), 373–383. https://doi.org/10.1007/s10964-005-9026-1

Bosmans, G., Braet, C., Beyers, W., Van Leeuwen, K., & van Vlierberghe, L. (2011). Parents’ power assertive discipline and internalizing problems in adolescents: The role of attachment. *Parenting: Science and Practice, 11*(1), 34–55. https://doi.org/10.1080/15295192.2011.53950

Bozanoğlu, I., Şimşek, Ö. F., Altıntaş, E., & Kocayörük, E. (2019). Revisiting attachment to parents and depression link in adolescence: the importance of language use and emotion regulation. *Current Psychology, 38*(3), 599–607. https://doi.org/10.1007/s12144-017-9714-5

Brablecová, H. (2012). *Závilost na internetu a attachment* [Internet addiction and attachment] [Unpublished bachelor thesis]. Masarykova univerzita.

Brack, G., Gay, M. F., & Matheny, K. B. (1993). Relationships between attachment and coping resources among late adolescents. Journal of College Student Development, 34(3), 212–215.

Braga, A. A. M. d. O. (2018). *Relação entre a qualidade da vinculação aos pais e pares e comportamentes assertivos em adolescentes* [Relationship between the quality of attachment to parents and peers and assertive behaviors in adolescents] [Unpublished master thesis]. University of Porto.

Brager‑Larsen, A., Zeiner, P., Klungsøyr, O., & Mehlum, L. (2022). Is age of self‑harm onset associated with increased frequency of non‑suicidal self‑
injury and suicide attempts in adolescent outpatients? *BMC Psychiatry, 22*, 58. https://doi.org/10.1186/s12888‑022‑03712‑w

Brandes, S. C. C. (2018). *Attachment in adolescence: Associations with internalizing and externalizing behavior*. [Unpublished doctoral dissertation]. University of Lisbon.

Brenson, M. J., Harris, P. B., & Rogers, C. S. (1992). Identity consequences of attachment to mothers and fathers among late adolescents. *Journal of Research on Adolescence, 2*(2), 187-204. https://doi.org/10.1207/s15327795jra0203_1

Broussard, D. B. (1998). *Attachment to parents as mediator and/ or moderator of psychosocial functioning among young adults with alcoholic fathers*. [Unpublished doctoral dissertation]. University of Arizona.

Brunstein-Klomek, A., Kopelman-Rubin, D., Apter, A., & Argintaru, H. (2017). A pilot feasibility study of interpersonal psychotherapy in adolescents diagnosed with specific learning disorders, attention deficit hyperactive disorder, or both with depression and/or anxiety symptoms (IPT-ALD). *Journal of Psychotherapy Integration, 27*(4), 526-539. https://doi.org/10.1037/int0000036

Bryant, K. J. (2015). *Examining the effects of parental combat deployment on the body mass index and eating behaviors and attitudes of adolescent female military dependents* [Unpublished dissertation]. Uniformed Services University of the Health Sciences.

Bucx, F., & Seiffge-Krenke, I. (2010). Romantic relationships in intra-ethnic and inter-ethnic adolescent couples in Germany: The role of attachment to parents, self-esteem, and conflict-resolution skills. *International Journal of Behavioral Development, 34*(2), 128–135. https://doi.org/10.1177/0165025409360294

Buist, K. L., Dekovic, M., M., Meeus, W., & van Aken, M. A. G. (2002). Developmental patterns in adolescent attachment to mother, father and sibling. *Journal of Youth and Adolescence, 31*(3), 167–176. https://doi.org/10.1023/A:1015074701280

Buist, K.L., Dekovic, M., M., Meeus, W., & van Aken, M.A.G. (2004). Attachment in adolescence: A social relations model analysis. *Journal of Adolescent Research*, *19*(6), 826-850. https://doi.org/10.1177/0743558403260109

Bullock, A. (2017). *Military stressors sand the well-being of adolescents in armed force families: The role of relationships with parents and peers*. [Unpublished doctoral dissertation]. Carleton University.

Burack, J. A., D’Arrisso, A., Ponizovsky, V., Troop-Gordon, W., Mandour, T., Tootoosis, C., Robinson, S., Iarocci, G., & Fryberg, S. (2013). ‘Friends and grades’: Peer preference and attachment predict academic success among Naskapi youth. *School Psychology International, 34*(4), 371–386. https://doi.org/10.1177/0143034312446888

Cameron, C. A., McKay, S., Susman, D. E. J., Edwards, K. M. W., Wright, J. M., & Weinberg, J. (2017). Cortisol stress response variability in early adolescence attachment, affect and sex. *Journal of Youth & Adolescence, 46*(1), 104–120. https://doi.org/10.1007/s10964-016-0548-5

Canestrari, C., Carrieri, A., Del Moral, G., Fermani, A., & Muzi, M. (2019). Do coping strategies and the degree of satisfaction with one’s social life and parental attachment modulate gelotophobia, gelotophilia and katagelasticism? A study on young Italian adults. *Current Psychology*. https://doi.org/10.1007/s12144-019-00417-4

Çankaya, Z. C., & Canbulat, N. (2017). Hope and secure attachment to parents in middle childhood (in Turkish). *Mehmet Akif Ersoy Üniversitesi Eğitim Fakültesi Dergisi, 44*, 1-20.

Cankaya, Z. C., & Denizli, S. (2020). An explanation of happiness with secure attachment, basic psychological needs and hope: The case of Turkish university students. *European Journal of Educational Research, 9*(1), 433-444. https://doi.org/10.12973/eu-jer.9.1.433

Cardoso, J. F. d. P. (2019). “*Let's make a story with our family ": The relations of linking the preschool to middle childhood continuity and contributions to socioemotional and academic development* (in Portuguese). [Unpublished doctoral dissertation]. ISPA Instituto Universatio.

Carter, J. M. (2011). *Examining the relationship among physical and psychological health, parent and peer attachment, and cyberbullying in adolescents in urban and suburban environments*. [Unpublished doctoral dissertation]. Wayne State University.

Carter, J. S., Smith, S., Bostick, S., & Grant, K. E. (2014). Mediating effects of parent–child relationships and body image in the prediction of internalizing symptoms in urban youth. *Journal of Youth & Adolescence, 43*, 554–567. https://doi.org/10.1007/s10964-013-9985-6

Carvalho, B. F. (2018). *Seremos o espelho dos nossos pais? A influência da Vinculação ao Pai e à Mãe na Identificação Partidária* [Will we be the mirror of our parents? The influence of attachment to the father and to the mother in the party identification] [Unpublished master thesis]. University of Porto.

Cavell, T. A., Jones, D. C., Runyan, R. D., Constantin-Page, L. P., & Velasquez, J. M. (1993). Perceptions of attachment and the adjustment of adolescents with alcoholic fathers. *Journal of Family Psychology, 7*(2), 204-212. https://doi.org/10.1037/0893-3200.7.2.204

Cavell, T. A., Meehan, B. T., Heffer, R. W., & Holladay, J. J. (2002). The natural mentors of adolescent children of alcoholics (COAs): Implications for preventive practices. *Journal of Primary Prevention, 23*(1), 23-42. https://doi.org/10.1023/A:1016587115454

Čerešník, M. & Baranova, K. (2021). Rizikové správanie, blízke vzťahy a osobnostné premenné dospievajúcich v systéme nižšieho sekundárneho vzdelávania [Risk management, close relationships and personal variables contributing to lower secondary education system]. University Palackeho v Olmouci.

Čeresnik, M., & Čeresnikova, M. (2020). *Age and gender differences in risk behavior of adolescents aged 10 to 15 years* [Unpublished manuscript]. University of Olmouc. Available online at https://www.researchgate.net/profile/Michal-Ceresnik/publication/342380858_Vekove_a_genderove_rozdiely_v_priputani_dospievajucich_vo_veku_10_az_15_rokov/links/5ef1dbc7a6fdcc73be96e30e/Vekove-a-genderove-rozdiely-v-priputani-dospievajucich-vo-veku-10-az-15-rokov.pdf

Čerešník, M., Tomšik, R., & Čerešníková, M. (2017). Risk behaviour and attachment of adolescents in lower secondary education in Slovakia. *TEM Journal, 6*(3), 534-539. https://doi.org/10.18421/TEM63-14

Chen, B.-B. (2017). Parent–adolescent attachment and procrastination: The mediating role of self-worth. *Journal of Genetic Psychology, 178*(4), 238-245. https://doi.org/10.1080/00221325.2017.1342593

Chen, H., Meza, J.I., Yan, Y., Wu, Q., & Lin, X. (2021). Parental attachment and depression in adolescents: Moderation-mediation model of empathy and gender. *Current Psychology*. https://doi.org/10.1007/s12144-021-01698-4

Chen, W., Zhang, D., Liu, J., Pan, Y., & Sang, C. (2018). Parental attachment and depressive symptoms in Chinese adolescents: The mediation effect of emotion regulation. *Australian Journal of Psychology, 71*(3), 241-248. https://doi.org/10.1111/ajpy.12239

Cherrier, C., Potard, C., Richard, A., Rusch, E., & Courtois, R. (2020). Parental attachment and physical intimate partner violence in young adults: Mediational role of dysfunctional attitudes. In C. Prakana & M. Wang (Eds.), *Psychological applications and development* IV (pp. 241-252). Science Press.

Cheung, A. M. P. (2019). *Hong Kong Chinese adults’ attachment representation continuity from childhood to adulthood in the context of childcare environment*. [Unpublished doctoral dissertation]. California School of Professional Psychology.

Chipuer, H. M. (2001). Dyadic attachments and community connectedness: Links with youths’ loneliness experiences. *Journal of Community Psychology, 29*(4), 429–446. https://doi.org/10.1002/jcop.1027

Cho, H.-K., & Min, H.-Y. (2012). Father attachment/mother attachment and ego-resiliency as mediators of self-competence [in Korean]. *Journal of Korean Home Management Association, 30*(5), 17-27. https://doi.org/10.7466/JKHMA.2012.30.5.017

Choi, K., & Kim, M. H. (2016). Influence of maternal attachment on adolescents’ adjustment as perceived by middle school students: The moderation effect of paternal attachment (in Korean). *Korean Journal of Child Studies, 37*(3), 27-38. https://doi.org/10.5723/kjcs.2016.37.3.27

Chou, H.-T. G., Esplin J., & Ranquist, S. (2013). Childhood attachment to parents and frequency of prayer during the college years. *Mental Health, Religion & Culture, 16*(8), 863-875. https://doi.org/10.1080/13674676.2012.727386

Chrystan, J.A. (2005). *Social anxiety in college students: The interaction of parental control and proximity*. [Unpublished master thesis]. West Virginia University.

Clarke, A., Meredith, P.J., & Rose, T. A. (2020). Exploring mentalization, trust, communication quality, and alienation in adolescents. *Plos ONE, 15*(6), e0234662. https://doi.org/10.1371/journal. pone.0234662

Clemens, K. A. (2004). *Relationships of attachment, family of origin characteristics, and personality variables*. [Unpublished doctoral dissertation]. University of Georgia.

Cloutier, P., Gray, C., Sheridan, N., Silverman, A., Cappelli, M., Zemek, R., Jabbour, M., Reid, S., & Kennedy, A. (2022). Building Resilience and Attachment in Vulnerable Adolescents (BRAVA): A brief group intervention for adolescents with mild-to-moderate suicidal ideation and their caregivers. *Child and Adolescent Mental Health, 27*(4), 343-351. https://doi.org/10.1111/camh.12506

Cohen, Z. P., Cosgrove, K. T., DeVille, D. C., Akeman, E., Singh, M. K., White, E.,
Stewart, J. L., Aupperle, R. L., Paulus, M. P., & Kirlic, N. (2021). The impact of
COVID-19 on adolescent mental health: Preliminary findings from a
longitudinal sample of healthy and at-risk adolescents. *Frontiers in Pediatrics, 9*, 622608. https://doi.org/ 10.3389/fped.2021.622608

Coleman, P. K. (2003). Perceptions of parent–child attachment, social self-efficacy, and peer relationships in middle childhood. *Infant and Child Development, 12*(4), 351–368. https://doi.org/10.1002/icd.316

Colton, P. A., Olmsted, M. P., Daneman, D., Rydall, A. C., & Rodin, G. M. (2007). Natural history and predictors of disturbed eating behaviour in girls with Type 1 diabetes. *Diabetic Medicine, 24*(4), 424–429. https://doi.org/10.1111/j.1464-5491.2007.02099

Conceição, J. M. (2010). *Social isolation in pre-adolescents: The relations between the quality of friendship and attachment to parents* (in Portuguese) [Unpublished master thesis]. ISPA Instituto Universario.

Consoli, N., Bernandes, J. W., & Marin, A. M. (2018). Lazos de afecto: las repercusiones del estilo de apego primario y establecido entre parejas en el ajuste conyugal [Ties between loved ones: The repercussions of the primary attachment style and the attachment style established between couples in the marital adjustment]. *Avances en Psicologia Latinoamericana, 36*(2), 315-329. https://doi.org/10.12804/revistas.urosario.edu.co/apl/a.5409

Cordeiro (2012). *Vinculação e temperamento afetivo em jovens adultos* [Attachment and affective temperament in young adults] [Unpublished dissertation]. University of Lisbon.

Cortés-García, L., Wichstrøm, L., Viddal, K. R., & Senra, C. (2019). Prospective bidirectional associations between attachment and depressive symptoms from middle childhood to adolescence. *Journal of Youth and Adolescence, 48*(11), 2099–2113. https://doi.org/10.1007/s10964-019-01081-4

Costa, N. (2007). *Hurricane Katrina and youth anxiety: The Role of parental anxiety, parental and youth attachment beliefs, and parenting behaviors, parental and youth attachment beliefs, and parenting behaviors*. [Unpublished doctoral dissertation]. University of New Orleans.

Coyl-Shepherd, D. D., & Newland, L. A. (2013). Mothers’ and fathers’ couple and family contextual influences, parent involvement, and school-age child attachment. *Early Child Development and Care, 183*(3-4), 553-569. https://doi.org/10.1080/03004430.2012.711599

Cruz, M. S. A. (2011). *Relação de Vinculação, Práticas Educativas e Ajustamento Emocional na Díade Pais – Filhos* [Attachment relationship, educational practices and emotional adjustment in parent-child dyads]. [Unpublished master thesis]. Universidade Lusófona de Humanidades e Tecnologias.

Cugmas, Z. (2011). Odnosi študentov in študentk z njihovimi starši, prijatelji in romantičnimi partnerji [The relationships of college students with their parents, friends and romantic partners]. *Psihološka Obzorja, 20*(4), 23–44.

Cunha, A. I., Relvas, A. P., & Soares, I. (2009). Anorexia nervosa and family relationships: Perceived family functioning, coping strategies, beliefs, and attachment to parents and peers. *International Journal of Clinical and Health Psychology, 9*(2), 229-240.

Cunha, M., Soares, I., & Pinto-Gouveia, J. (2008). The role of individual temperament, family and peers in social anxiety disorder: A controlled study. *International Journal of Clinical and Health Psychology, 8*(3), 631–655.

Cusimano, A. M. (2013). *The role of attachment in perceptions of interparental conflict and behavioral problems in middle childhood*. [Unpublished doctoral dissertation]. University of North Texas.

Dandona, A. (2022). Attachment of adolescents with parents and peers. *Youth Voice Journal*.

Dangaltcheva, A. (2014). *Attachment hierarchies among at risk teens and psychological adjustment* [Unpublished master thesis]. Simon Fraser University.

D’Arrisso, A. (2010). *Academic achievement in first nation adolescents: The role of parental and peer attachment in promoting successful outcomes*. [Unpublished master thesis]. McGill University.

da Silva, E. I. A. (2012). *Relações de Vinculação Íntimas, Relações Familiares e Bem-Estar
Psicológico: Um Estudo com Jovens Adultos* [Intimate bonding relationships, family relationships, and psychological well-being: A study of young adults] [Unpublished master thesis]. Universade do Minho.

da Silva. J. I. C. S. (2014). *The quality of attachment and victimization experiences: Its role in youth beliefs in the face of love* (in Portuguese). [Unpublished master thesis]. Egas Moniz Higher Institute of Health Sciences.

Danet, M. (2014). *Sphères d’influence des schémas d’attachement sur Internet etdans la vie quotidienne* [Spheres of influence of attachment patterns on the Internet and in everyday life]. [Unpublished dissertation]. Universite Paris 8 - Vincennes Sait-Denis.

Daubs, C. (2013). *Adolescent behavior problems and interparental conflict: The moderating role of parent-child attachment* [Unpublished dissertation]. University of North Texas.

Davis, A. L. (2002) *Sexually abusive adolescents: A study on parental attachment*. Unpublished manuscript. Retrieved December 1, 2021, from <https://ujcontent.uj.ac.za/vital/access/services/Download/uj:13969/CONTENT3>

De Jong, M. L. (1992). Attachment, individuation, and risk of suicide in late adolescence. *Journal of Youth and Adolescence, 21*(3), 357-373. https://doi.org/10.1007/BF01537023

De Koeyer, E. L. (2001). *Peer acceptance, parent-child fantasy play interactions, and subjective experience of the self-in-relation: A study of 4- to 5-year-old children*. [Unpublished doctoral dissertation]. Utrecht University.

De Minzi, M. C. R. (2007). Parental styles and attachment in relation with self- control, social skills and coping in children at risk for poverty. In D. M. Devor (Eds.), *New developments in parent-child relations* (pp. 87–110). Nova Editorial Publishers.

De Minzi, M. C. R. (2010). Gender and cultural patterns of mothers’ and fathers’ attachment and links with children’s self‐competence, depression and loneliness in middle and late childhood. *Early Child Development and Care, 180*(1-2), 193-209. https://doi.org/10.1080/03004430903415056

del Moral-Arroyo, G., Canestrari, C., Muzi, M., Suárez-Relinque, C., Carrieri, A., & Fermani, A. (2022). Parental attachment and satisfaction with social life: The mediating role of gelotophobia. *Psicothema*, *34*(3), 437-445.

de Oliveira, J. S. (2005). *Desenvolvimento Psicossocial e Estilos de Vinculação: Convergência e Divergência de Percepções de Satisfação na Família* [Psychosocial development and attachment styles: Convergence and divergence of perceptions of satisfaction in the family] [Unpublished dissertation]. University of Porto.

De Sousa, P. G. B. (2012). *Prevalencia Sintomatologia associada a Doencas do Comportamento Alimenta rem Adolescentes* [Prevalence and symptomatology associated with eating behavior diseases in adolescents]. [Unpublished master thesis]. University of Coimbra.

De Wit, E. (2013). *The determinants and influences of non-resident fathers’ relationships with their adolescent children*. [Unpublished doctoral dissertation]. University of the Free State.

DeBoard-Lucas, R. L., Fosco, G. M., Raynor, S. R., & Grych, J. H. (2010). Interparental conflict in context: Exploring relations between parenting processes and children’s conflict appraisals. *Journal of Clinical Child and Adolescent Psychology, 39*(2), 163–175. https://doi.org/10.1080/15374410903532593

DeFranc, W., & Mahalik, J. R. (2002). Masculine gender role conflict and stress in relation to parental attachment and separation. Psychology of Men & Masculinity, 3(1), 51–60.https://doi.org/ 10.1037/1524-9220.3.1.51

Delgado, L., Penelo, E., Fornieles, A., Brun-Gasca, C., & Ollé, M. (2016). Estructura factorial y consistencia interna de la versión española del Inventario de Apego a Padres y Pares para Adolescentes (IPPA) [Factorial structure and internal consistency of the Inventory of Parent and Peer Attachment for Adolescents (IPPA) Spanish version]. *Universitas Psychologica, 15*(1), 327-338. https://doi.org/10.11144/Javeriana.upsy15-1.efci

Delvecchio, E. (2013). *Protective and mediator factors for internalizing in early and mid-adolescence*. [Unpublished doctoral dissertation]. University of Padova.

Delvecchio, E., Li, J.-B., Liberska, L., Lis, A., & Mazzeschi, C. (2020). Early evidence of parental attachment among Polish adolescents. *Europe's Journal of Psychology, 16*(1), 82–94, https://doi.org/10.5964/ejop.v16i1.1809

Demby, K. P., Riggs, S. A., & Kaminsky, P. L. (2017). Attachment and family processes in children’s psychological adjustment in middle childhood. *Family Process, 56*(1), 234–249. https://doi.org/10.1111/famp.12145

Demir, T., Bolat, N., Yavuz, M., Karacetin, G., Dogangün, G., & Kayaalp, L. (2014). Attachment characteristics and behavioral problems in children and adolescents with congenital blindness. *Archives of Neuropsychiatry, 51*(2), 116-121. https://doi.org/10.4274/npa.y6702

Demirdöğen, E. S., Ünlü, N., Aluç, N., Sönmez, E., Ekiz, B., Çalkan, B., Gündoğdu, G. S., Güler, G., Kök, Ö., Afşar, I., Akdeniz, B., & Yavuz, M. (2021a). The relationships among attachment quality, depressive symptom levels, and metacognition problems in adolescents. *Turkish Journal of Child & Adolescent Mental Health, 28*(2), 131-137. https://doi.org/10.4274/tjcamh.galenos.2021.79188

Demirdöğen, E. S., Serdengecti, N., Sevilmis, I., Nane, C., Soyoz, E., & Yavuz, M. (2021b). The associations between attachment, thought-action fusion, and anxiety in adolescents: Mediator effect of thought-action fusion. *Psychiatry and Clinical Psychopharmacology, 31*(3), 303-309. https://doi.org/10.5152/pcp.2021.21109

Demirtaş, A. S., & Uygun-Eryurt, T. (2020). Attachment to parents and math anxiety in early adolescence: Hope and perceived school climate as mediators. *Current Psychology*. https://doi.org/10.1007/s12144-020-00964-1

Demirtas-Zorbaz, S., Zorbaz, O., & Kizildag, S. (2018). School engagement and parent attachment as predictors of perceived competence in adolescents. *Journal of Educational Science and Psychology, 8*(1), 28-43.

Deng, L., Ma, B., & Wu, Y. (2015). **Attachment and subjective well-being of junior middle school students: The mediating role of self-esteem (in Chinese).** *Psychological Development and Education, 31*(2), 230-238.

Dickenson, L. L. (2015). *Children’s diurnal HPA-axis activity: Assessment of temporal stability and associations with parent-child relationship qualities and stress-induced HPA-axis reactivity and recovery*. [Unpublished doctoral dissertation]. University of California.

Diener, M. L., Isabella, R. A., Behunin, M. G. & Wong, M. S. (2008). Attachment to mothers and fathers during middle childhood: Associations with child gender, grade, and competence. *Social Development, 17*, 84–101. https://doi.org/10.1111/j.1467-9507.2007.00416.x

DiFilippo, J. M., & Overholser, J. C. (2000). Suicidal ideation in adolescent psychiatric inpatients as associated with depression and attachment relationships. *Journal of Clinical Child Psychology, 29*(2), 155-16. https://doi.org/10.1207/S15374424jccp2902_2

Di Folco, S., Messina, S., Zavattini, G. C., & Psouni, E. (2017). Attachment to mother and father at transition to middle childhood. *Journal of Child and Family Studies, 26*(3), 721–733. https://doi.org/10.1007/s10826-016-0602-7

Dikmeer, I.A., Erol, N., & Gencöz, T. (2014). Emotional and behavioral problems associated with attachment security and parenting style in adopted and non-adopted children. *Turkish Journal of Psychiatry*. https://doi.org/ 10.5080/u7587

Dinh, K. T., McCabe, A., & Tein, J.-Y. (2020). Culture and well-being among Cambodian American adolescents: Mediating effects of parental, peer, and school attachments. *Asian American Journal of Psychology, 11*(2), 88-97. https://doi.org/10.1037/aap0000176

Dogan, H., Oztop, D., Eker, O. O., & Ozsoy, S. D. (2017). Effects of presence of maternal psychiatric disorders on attachment to parents and peers in children with attention-deficit/hyperactivity disorder. *Psychiatry and Clinical Psychopharmacology, 27*(S1), 181–215. https://doi.org/10.1080/24750573.2017.1310447

Doğan, T. (2016). Ergenlerde Ana-Babaya Bağlanma: Türkiye Profili [Attachment of adolescents to parents: Turkey profile]. *Psikiyatride Güncel Yaklaşımlar, 8*(4), 406-419. https://doi.org/10.18863/pgy.253446

Doğan, T., Karaman, N. G., Çoban, A. E., & Cok, F. (2012). Ergenlerde Arkadaşlık İlişkilerinin Yordayıcısı Olarak Cinsiyet ve Aileye İlişkin Değişkenler (Predictors of adolescents’ friendship qualities: gender and family related variables). *Elementary Education Online, 11*(4), 1010-1020.

Doh, H. S. (2000). Victimization by peers in early adolescents: Relationship to parent attachment, peer rejection and friendship (in Korean). *Korean Journal of Child Studies, 21*(1), 307-322.

Dolejšová, A. (2014). *Vztahová vazba a závislost na internetu* [Attachment and internet addiction] [Unpublished bachelor thesis]. Karl’s University of Prague.

Doležalová, P., Červenka, K., & Vojtová, V. (in press). Attachment of vulnerable adolescents in residential facilities in the Czech Republic. *Social Science in Health*. https://doi.org/10.32725/kont.2021.042

Douglas, A. M. (2018). *It takes a village to raise a child: Perceived community support and parenting satisfaction and efficacy among American Indian young mothers*. [Unpublished doctoral dissertation]. University of Montana.

Doyle, A., Brendgen, M., Markiewicz, D., & Kamkar, K. (2003). Family relationships as moderators of the association between romantic relationships and adjustment in early adolescence. *Journal of Early Adolescence, 23*(3), 316–340. https://doi.org/10.1177/0272431603254238

Doyle, A. B., Lawford, H., & Markiewicz, D. (2009). Attachment style with mother, father, best friend, and romantic partner during adolescence. *Journal of Research on Adolescence, 19*(4), 690–714.https://doi.org/ 10.1111/j.1532-7795.2009.00617.x

Doyle, A. B., Markiewicz, D., Brendgen, M., Lieberman, M., & Voss, C. (2000). Child attachment security and self-concept: Associations with mother and father attachment style and marital quality. *Merrill-Palmer Quarterly, 46*(3), 514-539.

Dreyer, K. K. (1995). *The relationship between parenting styles and parental attachment: First year college students*. [Unpublished master thesis]. Emporia State University.

Ducharme, J., Doyle, A.B., & Markiwicz, D. (2002). Attachment security with mother and father: Associations with adolescents’ reports of interpersonal behavior with parents and peers. *Journal of Personal and Social Relationships, 19*(2), 203-231. https://doi.org/10.1177/0265407502192003

Duchesne, S., & Larose, S. (2007). Adolescent parental attachment and academic motivation and performance in early adolescence. *Journal of Applied Social Psychology, 37*(7), 1501–1521.https://doi.org/ 10.1111/j.1559-1816.2007.00224.x

Duchesne, S., & Ratelle, C. F. (2014). Attachment security to mothers and fathers and the developmental trajectories of depressive symptoms in adolescence: Which parent for which trajectory? *Journal of Youth & Adolescence, 43*(4), 641–654. https://doi.org/10.1007/s10964-013-0029-z

Duchesne, S., Ratelle, C. F., Poitras, S.-C., & Drouin, E. (2009). Early adolescent attachment to parents, emotional problems, and teacher-academic worries about the middle school transition. *Journal of Early Adolescence, 29*(5), 743-766. https://doi.org/10.1177/0272431608325502

Dujcek, E. (2012). *Quality and attachment styles in adolescence* (in Croatian). [Unpublished master thesis]. University of Osijek.

Durkin, M. (1990). *The social functioning of adolescent children of alcoholics: Attachment as an intervening variable* [Unpublished University Undergraduate Fellow thesis]. Texas A & M University.

D’Urso, G. D., Symonds, J., & Pace, U. (2020). The role of psychoticism in the relationship between attachment to parents and homophobic bullying: A study in adolescence. *Sexologies, 29*(4), e103-e110. https://doi.org/10.1016/j.sexol.2020.08.005

Dursun, Y. (2021). Suça sürüklenen çocukların bağlanma stilleri ve aile aidiyetleri [Attachment styles and family belonging of juvenile delinquents]. *Sosyal Politika ve Sosyal Hizmet
Çalışmaları Dergisi, 2*(1), 1-29.

Dwyer, K. M. (2005). *Maternal and paternal parenting and girls’ and boys’ attachment security in middle childhood*. [Unpublished doctoral dissertation]. University of Maryland.

Dwyer, K. M., Fredstrom, B. K., Rubin, K. H., Booth-LaForce, C., Rose-Krasnor, L., & Burgess, K. B. (2010). Attachment, social information processing, and friendship quality of early adolescent girls and boys. *Journal of Social and Personal Relationships, 27*(1), 91–116. https://doi.org/10.1177/0265407509346420

Earl, R. M., & Burns, N. R. (2009). Experiences of peer aggression and parental attachment are correlated in adolescents. *Personality and Individual Differences, 47*(7), 748–752. https://doi.org/10.1016/j.paid.2009.06.014

Ebbert, A. M., & Luthar, S. S. (2021). Influential domains of schoolclimate fostering resilience in high achieving schools. *International Journal of School & Educational Psychology, 9*(4), 305-317. https://doi.org/10.1080/21683603.2021.1898501

Edwards, T. S. (2014). *An examination of psychological factors that influence African American men’s perception of parenting*. [Unpublished dissertation]. University of Georgia.

Elhusseini, S., Rawn, K., El-Sheik, M., & Keller, P.S. (2023). Attachment and prosocial behavior in middle childhood: The role of emotion regulation. *Journal of Experimental Child Psychology, 225*, 105534. https://doi.org/10.1016/j.jecp.2022.105534

El Kaaki, S. G. (2021). *Childhood maltreatment and parental attachment in the BDSM community* [Unpublished thesis]. Lebanese American University.

Ellwanger, P. B. (1994). *Adolescent coherion/attachment to parents: Relationships with parental attachment style, marital satisfaction and separation anxiety*. [Unpublished dissertation] Ohio State University.

El-Sheikh, M., & Buckhalt, J. A. (2003). Parental problem drinking and children’s adjustment: Attachment and family functioning as moderators and mediators of risk*. Journal of Family Psychology, 17*(4), 510–520. https://doi.org/10.1037/0893-3200.17.4.510

El-Sheik, M., & Elmore-Staton, L. (2004). The link between marital conflict and child
adjustment: Parent–child conflict and perceived attachments as mediators,
potentiators, and mitigators of risk. *Development and Psychopathology, 16*, 631–648. https://doi.org/10.10170S0954579404004705

Erdem, S. (2017). Attachment to parents and resilience among high school students. *Journal of Positive Psychology & Wellbeing, 1*(1), 22–33.

Esmailzadeh, L., Lavasani, M. G. A., & Ghasemzadeh, S. (2021). Comparing the effectiveness of schema therapy training and acceptance and commitment therapy in the attachment of gifted adolescents. *Razavi International Journal of Medicine, 9*(4), e1115 https://doi.org/10.30483/RIJM.2021.254277.1115

Estévez, A., Jauregui, P., Macía, L., & López‑González, H. (2021). Gambling and attachment: The mediating role of alexithymia in adolescents and young adults. *Journal of Gambling Studies, 7*, 497–514. https://doi.org/10.1007/s10899-020-09965-y

Estévez, A., Jauregui, P., Sanchez-Marcos, I., Lopez-Gonzalez, H., & Griffith, M. D. (2017). Attachment and emotion regulation in substance addictions and behavioral addictions. *Journal of Behavioral Addictions, 6*(4), 534-544. https://doi.org/10.1556/2006.6.2017.086

Evans, K. S. (1998). *The relationship of race and socioeconomic status to attachment and self-esteem in female college students*. [Unpublished dissertation]. University of Memphis.

Fabbro, N., Fattorini, R., Toso, C., Brugnara, A., Ferrante, A., Marino, H. … Calvo, V. (2009). Contributo alla standardizzazione del Questionario di Sicurezza e Protezione (QSP) [Contribution to the standardization of the Safety and Protection Questionnaire (QSP)]. *Cognitivismo Clinico, 6*(1), 6-23.

Fabiola, B., Rose, C., & Donatella, C. (2015). *Children and adolescents with somatic symptom disorders: Is attachment investigation a key aspect for the diagnostic and intervention process?* [Poster presented at the World Congress of Psychosomatic Medicine at Glasgow].

Fall, E., & Shankland, R. (2021). The mediating role of dispositional mindfulness in the relationship between parental and romantic attachment. *Journal of Adult Development, 28*, 126-137. https://doi.org/10.1007/s10804-020-09362-0

Fang, Q. (2017). *Attachment, bullying, and romantic relationships in college students*. [Unpublished doctoral dissertation]. Bowling Green State University.

Fanti, K. A., Henrich, C. C., Brookmeyer, K. A., & Kuperminc, G. P. (2008). Toward a transactional model of parent-adolescent relationship quality and adolescent psychological adjustment. *Journal of Early Adolescence, 28*(2), 252-276. https://doi.org/10.1177/0272431607312766

Farias, A. R. C. (2015). *Attachment standards, self-esteem and emotional states in children institutionalized and not institutionalized* (in Portuguese). [Unpublished doctoral dissertation]. Universidade Lusófona de Humanidades de Tecnologias.

Farndale, H. L. (2005). *Anxiety in adolescents: The contribution of parental divorce, parental conflict, and quality of attachment to parents and peers*. [Unpublished master thesis]. University of Tasmania.

Farnicka, M., & Grzegorzewska, I. (2015). Patterns of aggressive behaviour and victimization in adolescents. *The Open Psychology Journal, 8*, 23-31.

Farr, R. H., Grant-Marsney, H., & Grotevant, H. D. (2014). Adoptees’ contact with birth parents in emerging adulthood: The role of adoption communication and attachment to adoptive parents. *Family Process, 53*, 656–671. https://doi.org/10.1111/famp.12069

Felsman, D. E., & Blustein, D.L. (1999). The role of peer relatedness in late adolescent career development. *Journal of Vocational Behavior, 54*(2), 279–295. https://doi.org/10.1006/jvbe.1998.1664

Fermani, A., Bongelli, R., Carrieri, A., Arroyo, G. d. M., Muzi, M., & Portelli, C. (2019). “What is more important than love?” Parental attachment and romantic relationship in Italian emerging adulthood. *Cogent Psychology, 6*, 1693728. https://doi.org/10.1080/23311908.2019.1693728

Fermani, A., Bongelli, R., Del Moral Arroyo, G., Matuszak, APereyra Cardini, C.A. & Riccioni, I. (2020). The achievement of educational identity in adolescents and emerging adults adopted in Argentina and in Italy. *Revista Espacios, 41*(6), 7.

Fermani, A., Riccioni, I., Vincze, L., Cingolani, G., & Bongelli, R. (2021). The third transitional identity of migrant adolescents. The case of Hotel House, an Italian multi-ethnic skyscraper-ghetto. *Societies, 11*, 51. https://doi.org/10.3390/soc11020051

Fernandes, F., Sari, A.Y., & Mahathir (2021). Faktor-faktor yang Berhubungan dengan Kecanduan Internet pada Siswa SMAN “X” Padang [Factors associated with internet addiction in students of SMAN "X" Padang]. *NERS: Jurnal Keperawatan, 17*(1), 1-13.

Fernandes, M., Veríssimo, M., Santos, A. J., Ribeiro, O., Vaughn, B. E., Gastelle, M., & Kerns, K.A. (2021). Measurement invariance across mother/child and father/child attachment relationships. *Attachment and Human Development*, 23(1), 56-74. https://doi.org/10.1080/14616734.2019.1710222

Fischer, A. R., & Good, G. E. (1998). Perceptions of parent-child relationships and masculine role conflicts of college men. *Journal of Consulting Psychology, 45*(3), 346-352. https://doi.org/ 10.1037/0022-0167.45.3.346

Fitriani, W., & Hastuti, D. (2016). The influence of mother-adolescent, father-adolescent, and peer-attachments on adolescent delinquency in Lembaga Pemninaan Khusus Anak (LPKA) Kelas II Bandung (in Indonesian). *Jurnal Ilmu Keluargu & Konsumen, 9*(3), 206-217.

Flight, J. I. (2004). *The association between motivations for violence, the victim-offender relationship, and psychopathic traits in violent youth*. [Unpublished master thesis]. Carleton University.

# Fojanesi, M., Gallo, M., Spaziani, M., Russo, F., Valentini, M., Bersani, F.S. … Radicioni, A. (2018). Preliminary findings on the association between attachment patterns and levels of growth hormone in a sample of children with non-organic failure to thrive. *Rivista di Psichiatria, 53*(1), 49-52. https://doi.org/10.1708/2866.28923

Formoso, D., Gonzales, N.A., & Aiken, L. S. (2000). Family conflict and children’s internalizing and externalizing behavior: Protective factors. *American Journal of Community Psychology, 28*(2), 175-199. https://doi.org/10.1023/A:1005135217449

Fouladi, R. T., McCarthy, C.J., & Moller, N. P. (2002). Paper-and-pencil or online? Evaluating mode effects on measures of emotional functioning and attachment. *Assessment, 9*(2), 204-215. https://doi.org/10.1177/10791102009002011

# Fournier, S., Terradas, M. M., & Guillernette, A. M. (2020). Représentations d’attachement et capacité de mentalisation d’enfants d’âge scolaire en contexte de protection de l’enfance: une étude préliminaire [Attachment representations and mentalizing capacity of school aged children followed by the Youth Protection Department: A preliminary study]. European *Journal of Trauma and Dissocation, 4*(1), 100092. https://doi.org/10.1016/j.ejtd.2018.12.002

Fradinha, J. C. (2012). *Estudo da Qualidade da Vinculação e da Amizade em Adolescentes Isolados Retraídos e Isolados Agressivos* [Study of the quality of attachment and friendship in withdrawn isolated adolescents and aggressive isolates]. [Unpublished master thesis]. ISPA Instituto Universario.

Freeze, T. A., & DiTommaso, E. (2014) An examination of attachment, religiousness, spirituality and well-being in a Baptist faith sample. *Mental Health, Religion & Culture, 17*(7), 690-702. https://doi.org/10.1080/13674676.2014.899569

Freitas, M., Correira, J. V., Santos, A. J., & Rubin, K. H. (2010). *Developmental changes in security of attachment to mother and father and quality of friendship in Portuguese early adolescents* [Unpublished poster]. Available online at https://www.researchgate.net/profile/Miguel-Freitas-5/publication/259890695_Developmental_changes_in_security_of_attachment_to_mother_and_father_and_quality_of_friendship_in_Portuguese_preadolescents/links/5a7f3e03a6fdcc0d4baa78fa/Developmental-changes-in-security-of-attachment-to-mother-and-father-and-quality-of-friendship-in-Portuguese-preadolescents.pdf

Fu, Q., Miao, J., & Chen, Q. (2013). Impact of attchment to parents on children’s mental health: The moderation of stressful events [in Chinese]. *Chinese Journal of Child Health Care, 21*(12), 1246-1249.

Fuertes, J. N., Grindell, S. R., Kestenbaum, M., & Gorman, B. (2017). Sex, parent attachment, emotional adjustment, and risk-taking behaviors. *International Journal of High-Risk Behavior and Addiction, 6*(2), e36301. https://doi.org/10.5812/ijhrba.36301

Furman, W., & Simon, V. A. (2004). Concordance in attachment states of mind and styles with respect to fathers and mothers. *Developmental Psychology, 40*(6), 1239-1247.https://doi.org/ 10.1037/0012-1649.40.6.1239

Gaik, L.P., Abdullah, M. C., Elias, H., & Uli, J. (2013). Parental attachment as predictor of delinquency. *Malaysian Journal of Learning and Instruction, 10*, 99-117.

Galarza, M. J. M. (2015). *Attachment and self-concept in 5th grade students of primary level of public educational institutions*. [Unpublished master thesis]. University of Lima.

Gallarin, M., & Alonso-Arbiol, I. (2012). Parenting practices, parental attachment and aggressiveness in adolescence: A predictive model. *Journal of Adolescence, 35*, 1601-1610.https://doi.org/ 10.1016/j.adolescence.2012.07.002

Gambin, M., Wozniak-Prus, M., & Sharp, C. (2020). Executive functions and attachment to mother and father in inpatient female and male adolescents. *European Journal of Developmental Psychology, 17*(1), 1-18. https://doi.org/10.1080/17405629.2018.1511419

Gambin, M., Wozniak-Prus, M., Konecka, A., & Sharp, C. (2021). Relations between attachment to mother and father, mentalizing abilities and emotion regulation in adolescents. *European Journal of Developmental Psychology, 18*(1), 18-37. https://doi.org/10.1080/17405629.2020.1736030

Garcia, L. C. C. (2020). *Pathways from insecure attachment to depressive symptoms and disorderes eating in adolescents; Multiwave integrative models* [Unpublished dissertation]. University of Santiago der Compostella.

Garmon, L. C. (1999). *Relations between attachment representations and moral judgement.* [Unpublished doctoral dissertation]. Ohio State University.

Gemeay, E. M., Ahmed, E. S., Ahmad, E. R., & Al-Mahmoud, S. A. (2015). Effect of parents and peer attachment on academic achievement of late adolescent nursing students – A comparative study. *Journal of Nursing Education and Practice, 5*(6), 96-105.

Genius, C., & Violato, C. (2000). Attachment security to mother, father, and the parents. In C Violato, E. Oddone-Paolucci, & M. Genius (eds.), *The changing family and child development* (pp. 251-255). Taylor & Francis.

Germeijs, V., & Verschueren, K. (2009). Adolescents' career decision‐making process: Related to quality of attachment to parents? *Journal of Research on Adolescence, 19*(3), 349-483.https://doi.org/ 10.1111/j.1532-7795.2009.00603.x

Gerrits, M. H. (2004). *Perceived security, self-representation, and dyadic child-parent and child-peer play interactions: A longitudinal study*. [Unpublished doctoral dissertation]. University of Utrecht.

Gervinskaite-Paulaitiene, L. (2018). *Mentalization in early adolescence and its associations with attachment, abuse andemotional and behavioral difficulties*. [Unpublished dissertation]. Vilnius University.

Gervinskaite-Paulaitiene, L., Grausliene, I., & Barkauskiene, R. (2016; July). *Externalizing problems and attachment security in middle childhood over one-year time*. Poster presented at the 24th Biennial Meeting of the International Society for the Study of Behavioural Development, Vilnius, Lithuania.

# Ghahremani, L., Shirdel, T., Narari, M., & Kaveh, M. H. (2020). Association between parents and peer attachment with health locus of control: a cross-sectional study among Iranian adolescents. *International Journal of Adolescent Medicine and Health, 33*(6), 533-537. https://doi.org/10.1515/ijamh-2019-0238

Ghiasi, M., Yazdi, S. M., & Hedayatifar, L. (2000). Borderline personality traits; Eigenvalue spectrum of correlation network. *Journal of Fundamentals of Mental Health, 22*(6), 369-380.

Giesing, W. (2013). *Temperament, attachment, and co-parenting as risk and protective factors of depression in young adulthood* [Unpublished master thesis]. University of Illinois Urbana-Champaign.

Girgin, M. (2021). *9-12 Yaş Grubundaki Kekemelik Tanısı Almış Çocukların Güvenli Bağlanma ve Kaygı Düzeylerinin İncelenmesi* [Investigation of secure attachment and anxiety levels of children diagnosed with stuttering in the 9-12 age group] [Unpublished master thesis]. Hacettepe Üniversitesi Sağlık.

Gloger-Tippelt, G., & Schlager, C. (2017). Generalisierte Bindung im Vergleich zur personenspezifischen Bindung zu Mutter und Vater bei fünf- bis achtjährigen Kindern [Generalized attachment compared with person-specific attachment to mothers and fathers in five- to eight-year-olds]. In P. Zimmermann & G. Spangler (Eds.), *Feinfühlige Herausforderung: Bindung in Familie, Kita, Kinderheim und Jugendhilfe* (pp. 207-225). Psychosozialverlag.

Goldberg, J. L., & O’Brien, K. M. (2005). Jewish women's psychological well-being: The role of attachment, separation, and Jewish Identity. *Psychology of Women Quarterly, 29*(2), 197-206. https://doi.org/10.1111/j.1471-6402.2005.00182.x

Gomez, R., & Mclaren, S. (2007).The inter‐relations of mother and father attachment, self‐esteem and aggression during late adolescence. *Aggressive Behavior, 33*(2), 160-160. https://doi.org/10.1002/ab.20181

Gonçalves, S. C. d. S. (2016). *Vinculação em Jovens Adultos e Motivação para a Parentalidade* [Attachment in young adults and motivation for parenting] [Unpublished master thesis]. Universitade Portugalense.

Good, M., & Willoughby, T. (2014). Institutional and personal spirituality/religiosity and psychosocial adjustment in adolescence: Concurrent and longitudinal associations. *Journal of Youth & Adolescence, 43*, 757–774. https://doi.org/10.1007/s10964-013-9989-2

Goossens, L., Braet, C., Van Durme, K., Decaluwé, V., & Bosmans, G. (2012). The parent–child relationship as predictor of eating pathology and weight gain in preadolescents. *Journal of Clinical Child & Adolescent Psychology, 41*(4), 445-457, https://doi.org/10.1080/15374416.2012.660690

Granqvist, P. (2002). Attachment and religiosity in adolescence: Cross-sectional and longitudinal evaluations. *Personality and Social Psychology Bulletin, 28*(2), 260-270.https://doi.org/ 10.1177/0146167202282011

Gray, M. P., & O’Brien, K. M. (2007). Advancing the assessment of women’s career choices: The Career Aspiration Scale. *Journal of Career Assessment, 15*(3), 317–337. https://doi.org/10.1177/1069072707301211

Grayson, J. L. (2010). *The relation between parent substance use and adolescent risk behaviors: A normative study of direct and indirect influences in the family environment* [Unpublished doctoral dissertation]. Ohio University.

Grip, K. K., Almqvist, K., Axberg, U., & Broberg, A.G. (2014). Perceived quality of life and health complaints in children exposed to intimate partner violence. *Journal of Family Violence, 29*(6), 681–692. https://doi.org/10.1007/s10896-014-9622-5

Grogoleva, O. Y., & Prirezova, D. A. (2021). Psychological well-being of students with different types of separation and parental attachment [in Russian]. *Westnik Omskogo Universiteta, Seria Psychologia, 3c*, 6-17. https://doi.org/10.24147/2410-6364.2021.3.6-17

Guarnieri, S., Ponti, L., & Tani, F. (2010). The Inventory of Parent and Peer Attachment (IPPA): A study on the validity of styles of adolescent attachment to parents and peers in an Italian sample. *Testing, Psychometrics, Methodology, 17*(3), 103-130.

Guarnieri, S., Smorti, M., & Tani, F. (2015). Attachment relationships and life satisfaction during emerging adulthood. *Social Indicators Research, 121*(3), 833–847. https://doi.org/10.1007/s11205-014-0655-1

Guedes, M., Santos, A.J., Ribeiro, O., Freitas, M., Rubin, K.H., & Veríssimo, M. (2018). Perceived attachment security to parents and peer victimization: Does adolescent's aggressive behaviour make a difference? *Journal of Adolescence, 65*, 196-206. https://doi.org/10.1016/j.adolescence.2018.03.017

Gunawardena, T., & Schuck, N. (2021). Effect of parental emotion regulation ability and parent-child attachment on adolescent’s emotion regulation ability in Colombo, Sri Lanka. *Sri Lanka Journal of Child Health, 50*(4), 622-629.

Günaydın, G., Selçuk, E., Sümer, N., & Uysal, A. (2005). Ebeveyn ve Arkadaşlara Bağlanma Envanteri Kısa Formunun psikometrik açıdan değerlendirilmesi [The Psychometric Evaluation of the short form of Inventory of Parent and Peer Attachment]. *Türk Psikoloji Yazıları, 8*, 13-28.

Guinn, M. D. (2015). *Parent-adolescent attachment, bullying and victimization, and mental health outcomes* [Unpublished dissertation]. University of North Texas.

Gürtepe, A. (2022). *Ergenlerde Baglanma Soysal Dislanma ve Risikli Davranislarin Incelenmesi* [Attachment in adolescents and social exclusion and risky examination of behaviors] [Unpublished master thesis]. Balikesir University.

Gussoni-Leone, F. M. A. (2002). *Relationships of object relations functioning, attachment security and self-representations to the adult relatedness of college students* [Unpublished doctoral dissertation]. Seton Hall University.

Haddock, E. (2011).  *Perceptions and risk factors of gang association in a UK sample* [Unpublished doctoral dissertation]. University of Birmingham.

Hagley, A. M. (2008). *Perceptions of past and present attachment relationships* [Unpublished Senior Honors thesis]. Ohio State University at Newark.

Hallab, L., & Covic, T. (2010). Deliberate self-harm: The interplay between attachment and stress. *Behaviour Change, 27*(2), 93-103. https://doi.org/10.1375/bech.27.2.93

Hammond, W. A. (1999). *Canadian native adolescent solvent abuse and attachment theory* [Unpublished doctoral thesis]. University of Calgary. https://doi.org/10.11575/PRISM/22312

Han, S., Pistole, M.C., & Caldwell, J. M. (2017). Acculturative stress, parental and professor attachment, and college adjustment in Asian international students. *Journal of Multicultural Counseling and Development, 45*, 111-126. https://doi.org/10.1002/jmcd.12068

Hannum, W. W., & Dvorak, D. M. (2004). Effects of family conflict, divorce, and attachment patterns on the psychological distress and social adjustment of college freshmen. *Journal of College Student Development, 45*(1), 27-42. https://doi.org/10.1353/csd.2004.0008

Hansen, L. T. (2014). *Does attachment to parents mediate the relationship between couple conflict and adolescent self-regulation?* [Unpublished master thesis]. Brigham Young University.

Haigler, V. F., Day, H. D., & Marshall, D. D. (1995). Parental attachment and gender-role identity. *Sex Roles, 33*(3/4), 203-220. https://doi.org/10.1007/BF01544611

Harris, P. B. (1989). *The effects of differential attachment to mothers and fathers on adolescent identity* [Unpublished doctoral dissertation]. Virginia Polytechnic Institute.

Hasanah, R. A., & Latifah, M. (2021). Investigating adolescent’s online resilience: An explanation of adolescent characteristics, family characteristics, adolescent attachment to parents, emotion regulation, and peer relationship (in Indonesian). *Jural Ilmu Keluarga & Konsumen, 14*(3), 270-281.https://doi.org/ 10.24156/jikk.2021.14.3.270

Hébert, M., Daspe, M.E., & Cyr, M. (2018). An analysis of avoidant and approach coping as mediators of the relationship between paternal and maternal attachment security and outcomes in child victims of sexual abuse. *Psychological Trauma: Theory, Research, Practice, and Policy, 10*(4), 402-410. https://doi.org/10.1037/tra0000321

Hellenthal, R. L. (2010). *The separate and combined effects of mother, father, and peer attachment on young adolescents’ social, behavioral, and emotional adjustment* [Unpublished master thesis]. Ohio University.

Hellmann, J. N. (2014). *Social and psychological factors related to the career exploration process of young adults* [Unpublished master thesis]. University of Kentucky.

Henrique, V. V. D. C. (2017). V*inculo a Pais e pares e Comportamento Suicida em Adolescentes* [Attachment with parents and peers and suicide behavior in adolescence] [Unpublished dissertation]. Universidade de Brasília.

Herdian, Fatin, A. A., Grafiyana, A. G., & Wahidah, F. R. N. (2021). Parent and peer attachment to academic dishonesty in online learning during the COVID-19 pandemic. *Science and Education Scientific Journal, 2*(9), 273-282.

Herwandha, K. G., & Prastuti, E. (2021). *Attachment and age as predictors of the emotional maturity of university students*. ICoPsy International Conference of Psychology, 2020. 1-20. Available online at <https://knepublishing.com/index.php/KnE-Social/article/view/8185>

Higgins, G. E., Ricketts, M. L., Marcum, C. D., & Mahoney, M. (2010). Primary socialization theory: An exploratory study of delinquent trajectories.
*Criminal Justice Studies, 23*(2), 133-146. https://doi.org/10.1080/1478601X.2010.485472

Ho Min Chong, F. (2007). *The impact of parental attachment on adolescent externalizing problem behaviour in Hong Kong* [Unpublished doctoral dissertation]. City University of Hong Kong.

Holmberg, J. K. (2000). *An examination of parental and peer attachment relationships and social skills of adolescent sexual offenders* [Unpublished doctoral dissertation]. Ohio State University.

Holtzen, D. W., Kenny, M. E., & Mahalik, J. R. (1995). Contributions of parental attachment to gay or lesbian disclosure to parents and dysfunctional cognitive processes. *Journal of Counseling Psychology, 42*(3), 350-355. https://doi.org/10.1037/0022-0167.42.3.350

Hoseeinzadeh, M., & Khanjani, Z. (2016). Prediction of teenager depression based on social skill, peer attachment, parental attachment and self-esteem. *Asian Social Science, 12*(8), 251-259.

Hu, Y., & Jiang, X. (2022). Hope as an engine mediating the relation between parental attachment and social problem solving skills in adolescents. *School Psychology International, 43*(3), 237-252.https://doi.org/ 10.1177/01430343221091991

Huang, L. (2015). *The effects of parental attachment and social anxiety on subjective well-being in Chinese Korean adolescents* [Unpublished master thesis]. Ewha Womans University.

Hutchinson, C. M. (2002). *The relationship of adolescent attachment patterns to college student adjustment* [Unpublished master thesis]. Rowan University.

Hwang, R. (2012). *The well-being of Chinese immigrant sons: Importance of father-son attachment, father involvement, father acceptance and adolescents' phenomenological perceptions of father-son relationship* [Unpublished doctoral dissertation]. Antioch University.

Idrees, M., Zahra, S.M., & Naeem, F. (2021). Perceived parenting styles and primary attachment styles of single and children living wioth both parents. *Journal of Pakistan Medical Association, 71*(6), 1540. https://doi.org/10.47391/JPMA.626

İnce, B., Şimsek, Ö. F., & Özbek, L. (2020). Attachment and depression: The mediating roles of personal life projects and emotional intelligence. *Current Psychology, 39*, 1910–1920. https://doi.org/10.1007/s12144-019-0136-4

Ingoglia, S., Miano, P., Guajana, M. E., & Vitale, A. (2020). Secure attachment and individual protective factors against internalized homophobia. *Journal of Gay & Lesbian Mental Health, 24*(2), 136-154. https://doi.org/10.1080/19359705.2019.1688746

Innamorati, M., Parolin, L., Tagini, A., Santona, A., Bosco, A., De Carli, P. … Sarracino, D. (2018). Attachment, social value orientation, sensation seeking, and bullying in early adolescence. *Frontiers in Psychology, 9*, 239. https://doi.org/10.3389/fpsyg.2018.00239

Intrieri, R. C., & Margentina, S. J. (2019). Attachment and its relationship to anxiety sensitivity. *Current Psychology, 38*, 213-227. https://doi.org/10.1007/s12144-017-9607-7

Irfan, S., & Zulkefy, N. S. (2021). Parent-peer attachment, negative automatic thoughtsand psychological problems among Pakistani adolescents: A moderated mediation model. *Current Psychology*. https://doi.org/10.1007/s12144-021-01599-6

Irvin, A. A. (2008). *The relationship of parental and peer attachments and romantic connections with self-injurious behaviors among college students* [Unpublished doctoral dissertation]. Oklahoma State University.

Isola, E. (2019). *Family of origin experiences and young adults’romantic relationship outcomes* [Unpublished Honors thesis]. James Madison University.

Ismuni, J., Laile, J., Jaafar, S., & Fei, Y. (2012). Hubungan Antra Perapatan Keibubapaan Dengan Status Identiti Remaya Melaju [Relationship between parental attachment and identity statuses among Malay adolescents]. *Jurnal Pengajian Melay, 23*, 85-98.

Iwanski, A., Lichtenstein, L., Mühling, L. E., & Zimmermann, P. (2021). Effects of father and mother attachment on depressive symptoms in middle childhood and
adolescence: The mediating role of emotion regulation. *Brain Sciences, 11*, 1153. https://doi.org/10.3390/brainsci11091153

Jager, J., Yuen, C. X., Putnick, D. L., Hendricks, C., & Bornstein, M. H. (2015). Adolescent-peer relationships, separation and detachment from parents, and internalizing and externalizing behaviors linkages and interactions. *Journal of Early Adolescence, 35*(4), 511–537. https://doi.org/0.1177/0272431614537116

Jang, J. B., & Yoon, M. H. (2008). The effect of parent and peer attachment of elementary school children on the quality of friendship (in Korean). *Korean Journal of Community Living Science, 19*(4), 685-695.

Janssens, J. J., Achterhof, R., Lafit, G., Bamps, E., Hagemann, N.,
Hiekkaranta, A.P., Hermans, K.S.F., Lecei, A., Myin-Germeys, I., & Kirtley, O.J. (2021). The impact of COVID-19 on adolescents’ daily lives: The role of parent–child relationship quality. *Journal of Research on Adolescence, 31*(3), 623–644. https://doi.org/10.1111/jora.12657

Janssens, J.J., Myin-Germeys, I., Lafit, G., Achterhof, R., Hagemann, N., Hermans, K.S. … Kirtley, O.J. (in press). Lifetime and current self-harm thoughts and behaviours and their relationship to parent and peer attachment. *Crisis*. https://doi.org/10.1027/0227-5910/a000878

Jantan, R. F., Majzub, R. M., & Ishak, N. M. (2014). The quality of attachment to parent and peer among residential school students. *IMPACT: International Journal of Research in Humanities, Arts and Literature, 2*(8), 129-134.

Jardin, C., Venta, A., Newlin, E., Ibarra, S., & Sharp, C. (2017). Secure attachment moderates the relation of sexual trauma with trauma symptoms among adolescents from an inpatient psychiatric facility. *Journal of Interpersonal Violence, 32*(10), 1565 –1585. https://doi.org/10.1177/0886260515589928

Jauregui, P., & Estevez, A. (2020). Predictive role of attachment, coping, and emotion regulation in gambling motives of adolescents and young people. *Journal of Gambling Studies, 36*, 1283–1300. https://doi.org/10.1007/s10899-019-09893-6

Jeong, H., Yim, H.W., Lee, S.-Y., Lee, H. K., Potenza, M. N., Jo, S. J., & Son, H. J. (2020). A partial mediation effect of father-child attachment and self-esteem between parental marital conflict and subsequent features of internet gaming disorder in children: A 12-month follow-up study. *BMC Public Health, 20*, 484. https://doi.org/10.1186/s12889-020-08615-7

Jeong, K.-S., & Han, Y. (2013). Correlations between parental attachment, conflictual independence from parents and career attitude maturity in associate and bachelor nursing students. *Journal of the Korean Society for Maternal and Child Health, 17*(1), 93-104.

Jia, C., Sun, L., & Dai, X. (2018). The relationship between adolescent parental attachment and autobiographical memory (in Chinese). *Advances in Psychology, 8*(4), 494-503. https://doi.org/10.12677/ap.2018.84059

Jiang, Y., You, J., Zheng, X., & Lin, M.-P. (2017). The qualities of attachment with significant others and self-compassion protect adolescents from non-suicidal self-injury. *School Psychology Quarterly, 32*(2), 143–155.https://doi.org/ 10.1037/spq0000187

Jičínská, A. M. (2014). Souvislost citové vazby a interkulturní efektivity [The connection between emotional attachment and intercultural effectiveness] [Unpublished bachelor thesis]. University of Brno.

Jimoh, G.O., Eni-Olorunda, Adubi K.O., & Afolabi W.A.O. (2021). Influence of parental attachment on adolescent identity styles development. *Research on Humanities and Social Sciences, 11*(2), 30-34. https://doi.org/ 10.7176/RHSS/11-2-05

Jin, X. X. (2015). *The effects of parental attachment and self-esteem on school adjustment in Chinese college students* (in Korean) [Unpublished thesis]. Graduate School of Ewha Womans University.

Jo, M.-J., Kim, M.-J., & Kim, J.-Y. (2015). Moderating Effect of wealth and love in all the relationships between self-esteem and maladaptive behaviors of youth (in Korean). *Journal of the Korea Academia-Industrial Cooperation Society, 16*(7), 4586-4594. https://doi.org/10.5762/KAIS.2015.16.7.4586

Johnson, L. R. (2010). *The relationship of personality and parental and peer attachments with the experience and expression of anger among juvenile offenders* [Unpublished doctoral dissertation]. Oklahoma State University.

Jokschies, G. (2005). *Bindungsrepräsentationen und metakognitive Fähigkeiten bei jugendlichen und heranwachsenden Gewalttätern* [Attachment representations and metacognitive skills in adolescent violent offenders] [Unpublished doctoral dissertation]. Free University of Berlin.

Jones, J. E. (1999). *Multiethnic identity development, psychological adjustment, and parental attachment in adolescence* [Unpublished dissertation]. Adelphi University.

Jordan, E. M. C. (2007). *Impact of attachment to parents on parent-adolescent relationships, self-esteem, and relational aggression* [Unpublished dissertation]. University of Arizona.

Joseph, M. A., O’Connor, T. G., Briskman, J. A., Maughan, B., & Scott, S. (2014). The formation of secure new attachments by children who were maltreated: An observational study of adolescents in foster care. *Development and Psychopathology, 26*(1), 67-80. 10.1017/S0954579413000540

Jung, K.-H., & Kim, K.-S. (2018). Analysis of relationship between parent attachment and career maturity of middle school students. *Journal of the Korea Academia-Industrial Cooperation Society, 19*(10), 475-482.https://doi.org/10.5762/KAIS.2018.19.10.475

Kaasbøll, J., Skokauskas, N., Lydersen, S., & Sund, A. M. (2021). Parental chronic illness, internalizing problems in young adulthood and the mediating role of adolescent attachment to parents: A prospective cohort study. *Frontiers in Psychiatry, 12*, 807563. https://doi.org/10.3389/fpsyt.2021.807563

Kamkar, K. (2002). *The role of attachments to mother, father, and peer in depression among male and female middle adolescents* [Unpublished master thesis]. Concordia University.

Kamza, A. (2019). Attachment to mothers and fathers during middle childhood: An evidence from Polish sample. *BMC Psychology*, 7, 79. https://doi.org/10.1186/s40359-019-0361-5

Kamza, A., & Putko, A. (2012). Attachment security, verbal ability, and inhibitory control in middle childhood. *BMC Psychology, 9,* 24*.* https://doi.org/10.1186/s40359-021-00524-7

Kantolic, I., & Peric, B. (2012). *Odnos Privrzenosti Roditeljima I Kvaliteta Prijateljstava u Adolescenciji* [Relationship of attachment to parents and quality of friendships in adolescence]. Unpublished manuscript, University of Zagreb. Retrieved January 14, 2021, from [www.unizg.hr](http://www.unizg.hr)

Kara, B. (2020). *Ergenlerin ebeveyn ve akran bağlanmaları ile depresyon arasındaki ilişkinin incelenmesi* [Examining the relationship between adolescents' parent and peer attachment and depression] [Unpublished master thesis]. İstanbul Gelişim Üniversitesi.

Karababa, A. (2021). Understanding the association between parental attachment and loneliness among adolescents: The mediating role of self-esteem. *Current Psychology*. https://doi.org/10.1007/s12144-021-01417-z

Kaur, R. (2021). *Does parental attachment or sibling attachment
influence the quality of later life romantic relationships?* [Unpublished master thesis]. Auckland University of Technology.

Kaya, Y., & Aydin, A. (2021). The mediating role of early maladaptive schemas in the relationship between attachment and mental health symptoms of university students. *Journal of Adult Development, 28*(1), 15-24. https://doi.org/10.1007/s10804-020-09352-2

Kaya, Y., & Öz, F. (2020). The roles of adolescents' perceived parental attitudes and attachment styles in their self-perception: A structural equation modelling. *Journal of Psychiatric Nursing, 11*(2), 106-114. https://doi.org/10.14744/phd.2020.74429

Kayastha, P., Hirisave, U., Natarajan, G., & Goyal, G. (2010). Security of attachment in children and adolescents—An Indian experience. *Asian Journal of Psychiatry, 3*, 173-176. https://doi.org/10.1016/j.ajp.2010.10.003

Kaźmierczak-Mytkowska, A., Butwicka, A., Lucci, K.D., Wolańczyk, T., & Bryńska, A. (2022). Attachment in adolescents with attention deficit hyperactivity disorder and oppositional defiant disorder. *Psychiatrika Polska, 56*(3), 535-549. https://doi.org/10.12740/PP/OnlineFirst/130366

Keizer, R., Helmerhorst, K. O. W., & van Rijn-van Gelderen, L. (2019). Perceived quality of the mother–adolescent and father–adolescent attachment relationship and adolescents’ self-esteem. *Journal of Youth and Adolescence, 48*(6), 1203–1217. https://doi.org/10.1007/s10964-019-01007-0

Keller, P. S., El-Sheikh, M., & Buckhalt, J. A. (2008). Children’s attachment to parents and their academic functioning: Sleep disruptions as moderators of effects. *Journal of Developmental & Behavioral Pediatrics, 29*(6), 441-449. https://doi.org/10.1097/DBP.0b013e318182a9b4

Keller, P. S., & El-Sheikh, M. (2011). Children’s emotional security and sleep: Longitudinal relations and directions of effects. *Journal of Child Psychology and Psychiatry, 52*(1), 64–71. https://doi.org/10.1111/j.1469-7610.2010.02263.x

Kelley, M. L., Braitman, A., Henson, J.M., Schroeder, V., Ladage, J., & Gumienny, L. (2010). Relationships among depressive mood symptoms and parent and peer relations in collegiate children of alcoholics. *American Journal of Orthopsychiatry, 80*(2), 204-212. https://doi.org/10.1111/j.1939-0025.2010.01024.x

Kennedy, M, (2012). *Examining the importance of the family on pre-school attachment and children's social development* [Unpublished doctoral dissertation]. Nottingham Trent University.

Kennedy, M., Kreppner, J., Knights, N., Kumsta, R., Maughan, B., Golm, D., Hill, J. … Sonuga-Barke, E. (2017). Adult disinhibited social engagement in adoptees exposed to extreme institutional deprivation: Examination of its clinical status ans functional impact. *British Journal of Psychiatry, 211*, 289-295. https://doi.org/10.1192/bjp.bp.117.200618

Kenny, M. E., Gallagher, L. A., Alvarez-Salvat, R., & Silsby, J. (2002). Sources of support and psychological distress in academically successful inner-city youth. *Adolescence, 37*(145), 161-182.

Kenny, M. E., Lomax, R., Brabeck, M., & Fife, J. (1998). Longitudinal pathways linking adolescent reports of maternal and paternal attachments to psychological well-being. *Journal of Early Adolescence, 18*(3), 221-243. https://doi.org/10.1177/0272431698018003001

Keresteš, G., Rezo, I., & Ajduković, M. (2019). Links between attachment to parents and internalizing problems in adolescence: The mediating role of adolescents’ personality. *Current Psychology*. https://doi.org/10.1007/s12144-019-00210-3

Kerns, K. A., Mathews, B. L., Koehn, J. A., Williams, C. T., & Siener-Ciesla, S. (2015). Assessing both safe haven and secure base support in parent–child relationships. *Attachment & Human Development, 17*(4), 337–353. https://doi.org/10.1080/14616734.2015.1042487

Kerns, K. A., Tomich, P. L., Aspelmeier, J. E., & Contreras, J. M. (2000). Attachment-based assessments of parent–child relationships in middle childhood. *Developmental Psychology, 36*(5), 614–626. https://doi.org/10.1037/0012-1649.36.5.614

Kerstis, B., Åslund, C., & Sonnby, K. (2018). More secure attachment to the father and the mother is associated with fewer depressive symptoms in adolescents. *Upsala Journal of Medical Sciences, 123*(1), 62-67. https://doi.org/10.1080/03009734.2018.1439552

Ketterson, T. U., & Blustein, D.L. (1997). Attachment relationships and the career exploration process. *Career Development Quarterly, 48*(2), 167-178. https://doi.org/10.1002/j.2161-0045.1997.tb01003.x

Khorashadizadeh, S., Shahabizadeh, F., & Dastjerdi, R. (2012). The role of perceived childhood attachment, family functioning and attributional styles in social anxiety (in Farsi). *Developmental Psychology (Journal of Iranian Psychologists), 8*(32), 385-396.

Khosrojerdi, Z., Pourshahriar, H., & Heydari, M. (2019). Predicting the adolescent character strengths and attachment to parents and peers based on conflicts with parents (in Farsi). *Journal of Family Research, 15*(3), 347-360. https://doi.org/10.29252/jfr.15.3.3

Khosravi, Z., Hashemi, M., & Nejati, Z. (2021). *Structural model of the effect of attachment to parents on attachment to peers through the mediation of psychological capital on the personality type D (in Farsi). Journal of Analitical-Cognitive Psycholoy, 12*(44), 107-118.

Kim, B. (2016). Relationship between attachment for intimate relations and self-regulated learning ability of college students (in Korean). *Journal of the Korea Academia-Industrial Cooperation Society, 17*(10), 245-252. https://doi.org/10.5762/KAIS.2016.17.10.245

Kim, B., & Choi, Y.S. (2012). Elementary school children’s self-concept and school life adjustment according to attachment types of parents, teachers and peers. *Journal of the Korean Home Economics Association, 50*(1), 1-13. https://doi.org/10.6115/khea.2012.50.1.001

Kim, E., & Jang, K. S. (2012). Developing a prediction model regarding adjustment of nursing students to college life. *Journal of the Korean Academic Society of Nursing Education, 18*(2), 312-322.https://doi.org/10.5977/jkasne.2012.18.2.312

Kim, H.J. (2011). Relations among suicidal ideation, parental attachment, and self-identity of college students (in Korean). *Journal of East-West Nursing Research, 17*(2), 132-138.

Kim, H. S., Chae, Y.S., & Bae, Y. J. (2012). The protective factors of suicide probability in religious male high school students [in Korean]. *Journal of the Korean Academy of Nursing, 42*(1), 1-8. https://doi.org/10.4040/jkan.2012.42.1.1

Kim, J.-E., Doh, H.-S., Kim, M.-J., & Kim, J.-H. (2013). The influences of parental attachment on social competence of school-aged children: The mediating role of empathy (in Korean). *Korean Journal of Child Studies, 34*(3), 129-150. https://doi.org/10.5723/KJCS.2013.34.3.12

Kim, K., & Kim, K. (2015). Internet game addiction, parental attachment, and parenting of adolescents in South Korea. *Journal of Child and Adolescent Substance Abuse, 24*, 366–371. https://doi.org/10.1080/1067828X.2013.872063

S., & Kim, J. (2016). The effect of parent attachment in adolescent on internet addiction tendency: The mediating effects of emotional regulation ability (in Korean). *Korean Journal of Clinical Psychology, 35*(1), 265-281.

Kim, S., Sharp, C., & Carbone, C. (2014). The protective role of attachment security for adolescent borderline personality disorder features via enhanced positive emotion regulation strategies. *Personality Disorders: Theory, Research, and Treatment, 5*(2), 125–136. https://doi.org/10.1037/per0000038

Kim, S. H., Lee, D. H., Choi, S.J., & Lee, D.Y. (2018). Moderating effects of mother attachment and father attachment on the relation between school adjustment, depression, and anxiety in adolescents (in Korean). *Korean Journal of Counseling and Psychotherapy, 30*(4),1301-1326.

Kim, S. H., & Park, S. Y. (2009). Relations between parenting behaviors, adolescents’ parent and peer attachment, and self-esteem by adolescent gender. *Journal of Korean Home Management, 27*(5), 101-113.

Kim, S. J., Doh, H.-S., Lee, W. K., & Park, B. (2016). The pathways from parent attachment to adolescent life satisfaction through peer attachment and romantic relationships (in Korean). *Korean Journal of Child Studies, 37*(5), 83-100. https://doi.org/10.5723/kjcs.2016.37.5.83

Kim, Y., Kwon, S. J., & Kwon, H. J. (2015). Influence of self-esteem, parent attachment and peer attachment on university freshmen’ sexual attitude (in Korean). *Journal of the Korean Contents Association, 15*(4), 291-303. https://doi.org/10.5392/JKCA.2015.15.04.291

Kim, Y.-H., Son, H.-M., Yang, Y.-O., Cho, Y.-R., & Lee, N.-Y. (2007). Relation between internet game addiction in elementary school students and student's perception of parent-child attachment (in Korean). *Journal of the Korean Academy of Child Health Nursing, 13*(4), 383-389.

Kirzildag, S. (2019). Peer relations in adolescence. *International Journal of Society Researches, 10*, 17. https://doi.org/10.26466/opus.531892

Klomek, A. B., Kopelman-Rubin, D., Al-Yagon, M., Berkowitz, R., Apter, A., & Mikulincer, M. (2016). Victimization by bullying and attachment to parents and teachers among student who report learning disorders and/or attention deficit hyperactivity disorder. *Learning Disability Quarterly, 39*(3), 181-190. https://doi.org/10.1177/0731948715616377

Klomek, A. B., Kopelman-Rubin, D., Al-Yagon, M., Mufson, L., Apter, A., Erlich, I. L., & Mikulincer, M. (2013). Changes in attachment representations during an open trial of a
psychological intervention for adolescents with learning disorders. *Adolescent Psychiatry, 3*, 329-335.

Knabb, J. J., & Pelletier, J. (2013). Effects of parental divorce on God image among young adults at a Christian university. *Marriage & Family Review, 49*(3), 231-250. https://doi.org/10.1080/01494929.2012.762443

Knez, M. (2014). *Psihosocijalne determinante ovisnosti o drogama* (Psychosocial determinants of drug addiction) [Unpublished master thesis]. Josip Juraj Strossmayer University of Osijek.

Kocayörük, E. (2009). The predictive level of attachment to mother, father, and peer for adolescent adjustment (in Turkish). *Bilimleri ve Uygulama, 8*(15), 103-118.

Kocayörük, E. (2010). Pathways to emotional well-being and adjustment in adolescence: The role of parent attachment and competence. *International Online Journal of Educational Sciences, 2*(3), 719-737.

Kocayörük, E., & Şimşek, Ö. F. (2016). Parental attachment and adolescents' perception of school alienation: The mediation role of self-esteem and adjustment*. Journal of Psychology, 150*(4), 405-421. https://doi.org/10.1080/00223980.2015.1060185

Kokkinos, C. M., Algiovanoglou, I., & Voulgaridou, I. (2019). Emotion regulation and relational aggression in adolescents: Parental attachment as moderator. *Journal of Child and Family Studies, 28*(11), 3146–3160. https://doi.org/10.1007/s10826-019-01491-9

König, L., Gloger-Tippelt, G. & Zweyer, K. (2007). Bindungsverhalten zu Mutter und Vater und Bindungsrepräsentationen bei Kindern im Alter von fünf bis sieben Jahren [Attachment behavior with respect to mothers and fathers and attachment representations in five and seven year old children]. *Praxis der Kinderpsychologie und Kinderpsychiatrie, 56*(5), 445–462. https://doi.org/10.13109/prkk.2007.56.5.445

Kontrimiené, S. (2018). *Relationship between humanistic sprituality and parenting experiences* [Unpublished dissertation]. Vilnius University.

Koo, M. H. (2012). The relationships between children's emotional and behavioral problems, attachment, fears and coping behavior (in Korean). *Korean Journal of Child Studies, 33*(1), 133-145.

Koški, M. (2016). *Uznemiravanje i nasilje preko interneta, slika o sebi i odnos s roditeljima i vršnjacima* [Harassment and violence over the internet, self-image and relationship with parents and peers] [Unpublished master thesis]. Josip Juraj Strossmayer University of Osijek.

Košutić, Z., Mitkovic-Vončina, M., Dukanac, V., Lazarević, M., Dobroslavić, T.R., Šoljaga, M. … Toševski, D.L. (2019). Attachment and emotional regulation in adolescents with depression. *Vojnosanitetski Pregled, 76*(2), 127–135. https://doi.org/10.2298/VSP160928060K

Kotnik, P. (2021). *Navezanost na Starše, Kakovost Družinskega Živiljenja in Samospoštovanje pri Mladostnikih* [Attachment to parents, quality of family life and self-esteem in adolescents] [Unpublished master thesis]. University of Ljubljana.

Kouvo, A.M., Voeten, M., & Silven, M. (2015). Fathers’ and mothers’ attachment representations as predictors of preadolescents’ attachment security: A ten-year follow-up of Finnish families. *Scandinavian Journal of Psychology, 56*(5), 527–536. https://doi.org/10.1111/sjop.12224

Krol, H. P. R. (2015). *Trust as a predictor of eating disorder severity and therapeutic alliance in an adolescent clinical sample* [Unpublished doctoral dissertation]. University of Texas Southwestern Medical Center at Dallas.

Krstić, K. (2016). Attachment to parents and friends as a context for development of self-concept in adolescence: The personality traits as mediators. *Psihologija, 49*(4), 335–355. https://doi.org/10.2298/PSI1604335K

Kumar, M., & Fonagy, P. (2012). Conceptualizing attachment trauma: Exploring emotional vulnerabilities among disaster affected children of Gujarat. *Psychological Studies, 57*(1), 9–21. https://doi.org/10.1007/s12646-011-0114-x

Kumar, S. A., & Mattanah, J. F. (2016). Parental attachment, romantic competence, relationship satisfaction, and psychosocial adjustment in emerging adulthood. *Personal Relationships, 23*(4), 801–817. https://doi.org/10.1111/pere.12161

Kuperminc, G. P., Blatt, S. J., & Leadbeater, B. J. (1997). Relatedness, self-definition, and early adolescent adjustment. *Cognitive Therapy and Research, 21*(3), 301-320. https://doi.org/10.1023/A:1021826500037

Kurt, Y. (2017). *Translation and the validation process of the Hemingway: Measure of adolescent connectedness (MAC) into Turkish* [Unpublished doctoral dissertation]. St. Mary’s University.

Kusnetsova, M. I. (2011). *Adjustment of families with children adopted from Eastern Europe* [Unpublished dissertation]. Virginia Commonwealth University.

Kwak, E. (2011). *Father attachment, mother attachment and peer relationships: The interaction effect of emotional abilities* (in Korean) [Unpublished master thesis]. Ewha Womans University Graduate School.

Kwon, M. (2022). *A study on the effect of the peer attachment and best friend attachment on psychological adjustments of early adolescent* (in Korean) [Unpublished master thesis]. Ewha Womans University.

Labrie, J. W., & Sessoms, A. E. (2012). Parents still matter: The role of parental attachment in risky drinking among college students. *Journal of Child & Adolescent Substance Abuse, 21*(1), 91–104. https://doi.org/10.1080/1067828X.2012.636704

Ladner, M. T. H. (2003). *Psychological reactance as a personality characteristic: Relationships to attachment and autonomy* [Unpublished doctoral dissertation]. Louisiana Tech University.

Lakman, Y. & Chalmers, H. (2019). Psychosocial comparison of carers and noncarers. *Child & Youth Services, 40*(2), 200-219. https://doi.org/10.1080/0145935X.2018.1553614

Láng, A., & Birkás, B. (2015). Machiavellianism and parental attachment in adolescence: Effect of the relationship with same-sex parents. *SAGE Open*. https://doi.org/10.1177/2158244015571639

Langher, V., Scurci, G., Tolve, G., & Caputo, A. (2013). Perception of attachment security in families with children affected by neurological illness. *Psihologija, 46*(2), 99–110. https://doi.org/10.2298/PSI1302099L

Laporta-Herrero, I., Jauregui-Lobera, I., Barajas-Iglesias, B., Serrano-Troncoso, E., Garcia-Argebay, M., & Santed-German, R.A. (2021). Attachment to parents and friends and body dissatisfaction in adolescents with eating disorders. *Clinical Child Psychology and Psychiatry, 2526*(1), 154-166. https://doi.org/10.1177/1359104520962155

Larose, S., & Boivin, N. (1997). Structural relations among attachment working models of parents, general and specific support expectations, and personal adjustment in late adolescence. *Journal of Social and Personal Relationships, 14*(5), 579-601.https://doi.org/ 10.1177/0265407597145001

Larose, F., & Boivin, M. (1998). Attachment to parents, social support expectations, and socioemotional adjustment during the high school-college transition. *Journal of Research on Adolescence, 8*(1), 1-27. https://doi.org/10.1207/s15327795jra0801_1

Latiff, L. A., Akhtari-Zavare, M., Esfehani, A. J., Bakar, A. S. A., Siew, C. Y., Awang, H, & Adznamm, S. N. (2018). A cross sectional study to explore factors affecting adolescent-parents attachment in a rapidly developing society in Malaysia. *Malaysian Journal of Medicine and Health Sciences, 14*(1), 35-43.

Latiff, L. A., Tajik, E., Ibrahim, N., Bakar, A. S. A., & Shirin, S. A. (2017). Psychosocial problem and its associated factors among adolescents in the secondary schools in Pasir Gudang, Johor. *Malaysian Journal of Medicine and Health Sciences, 13*(1), 35-44.

Laumi, L. & Adiyanti, M.G. (2012). Attachment of late adolescent to mother, father, and peer, with family structure as moderating variable and their relationships with self-esteem. *Jurnal Psilologi, 39*(2), 129 – 142.

Leadbeater, B. J., Kuperminic, G. P., Blatt, S. J., & Hertzog, C. (1999). A multivariate model of gender differences in adolescents’ internalizing and externalizing problems. *Developmental Psychology, 35*(5), 1268-1282. https://doi.org/10.1037/0012-1649.35.5.1268

Lease, S. H., & Dahlbeck, D. T. (2009). Parental influences, career decision-making attributions, and self-efficacy: Differences for men and women? *Journal of Career Development, 36*(2), 95-113. https://doi.org/10.1177/0894845309340794

Lee, J., & Kim, M. (2015). Parental attachment, career decision self-efficacy, and commitment to the career choice among Korean college students. *Journal of Asia Pacific Counseling, 5*(1), 39-52. https://doi.org/10.18401.2015.5.1.3

Lee, J.-M., & Bell, N.J. (2003). Individual differences in attachment–autonomy configurations: Linkages with substance use and youth competencies. *Journal of Adolescence, 26*(3), 347–361. https://doi.org/10.1016/S0140-1971(03)00018-6

Lee, K.-W., Lee, J.-Y., & Jang, J.Y. (2013). The mediating effect of fear of intimacy between
attachment with parents and addictive use of the internet. *Korean Journal of Psychology: General, 32*(1), 91-106.

Lee, P. H., & Shin, Y. (2018). The relationship between attachment and children’s friendship network and friendship quality: Focusing on the mediating effect of empathy [in Korean]. *Family Environment Research, 56*(2), 123-131. https://doi.org/10.6115/fer.2018.009

Lee, S., Meszaros, P. S., & Colvin, J. (2009) Cutting the wireless cord: College student cell phone use and attachment to parents. *Marriage & Family Review,45*(6-8), 717-739. https://doi.org/10.1080/01494920903224277

Lee, Y. J., & Park, S. H. (2017). Interplay between attachment to peers and parents in Korean
adolescents’ behavior problems. *Journal of Child and Family Studies, 26*, 57–66.
https://doi.org/10.1007/s10826-016-0552-0

Lenkiewicz, K., Konowałek, L., & Bryńska, A. (2021). Assessment of criterion validity of personality disorder diagnosis in adolescents and relations between attachment
style and personality disorder diagnosis. *Psychiatrica Polska, 55*(5), 1139–1155. https://doi.org/10.12740/PP/OnlineFirst/119778

Leonard, K. C., Cook, K. V., Boyatzis, C., Kimball, C. N., & Flanagan, K. S. (2013). Parent-child dynamics and emerging adult religiosity: Attachment, parental beliefs, and faith support. *Psychology of Religion and Spirituality, 5*(1), 5-14. https://doi.org/10.1037/a0029404

Lepojevic, M. K. & Gutwein, N. (2021). Control less, trust more: Parenting and externalizing problems in adolescents [in Serbian]. *Proceedings of the Institute for Pedagogical Research, 53*(2), 281–307.

Lewis, F. M. (2007). *The impact of breast cancer on adolescent function* [Unpublished report]. University of Washington. Retrieved April 24, 2021, from <https://apps.dtic.mil/sti/pdfs/ADA475734.pdf>

Li, J.-B., Delvecchio, E., Miconi, D., Salcuni, S., & Di Riso, D. (2014). Parental attachment among Chinese, Italian, and Costa Rican adolescents: A cross-cultural study. *Personality and Individual Differences, 71*, 118-123. https://doi.org/10.1016/j.paid.2014.07.036

Li, J. B., Liberska, H., Salcuni, S., & Delvecchio, E. (2019). Aggressive perpetration and victimization among Polish male and female adolescents: The role of attachment to parents and self-control. *Crime & Delinquency, 65*(3), 401-421. https://doi.org/10.1177/0011128718787472

Li, J.-B., Lis, A., & Delvecchio, E. (2016). Familism and depressive symptoms among Italian adolescents: The mediating effect of parental attachment. *Children and Youth Services Review, 71*, 130-136. https://doi.org/10.1016/j.childyouth.2016.11.00201

Li, M., Chen, X., Gong, H., Ji, W., Wang, W., Liang, S., & Kong, A. (2021). The
predictive effect of parental adult attachment on parent–adolescent attachment: The mediating role of harsh parenting. *Frontiers in Psychology, 12*, 710167.
https://doi.org/10.3389/fpsyg.2021.710167

Li, N., Zhang, W., Li, D., Mai, Y., & Wang, J. X. W. (2009). Parent-adolescent attachment, emotional intelligence, and aggression in adolescence (in Chinese). *Psychological Development and Education, 2*, 100124918.

Li, R., Bunke, S., & Psouni, E. (2016). Attachment relationships and physical activity in adolescents: The mediation role of physical self-concept. *Psychology of Sport & Exercise,* *22*, 160-169. https://doi.org/10.1016/j.psychsport.2015.07.003

Li, X., Bian, C., Chen, Y., Huang, J., Ma, Y., Tang, L. … Yu, Y. (2015). Indirect aggression and parental attachment in early adolescence: Examining the role of perspective taking and empathetic concern*. Personality and Individual Differences, 86*, 499-503. https://doi.org/10.1016/j.paid.2015.07.008

Li, Y. L. (2008). An examination of three models of the relationships between parental attachments and adolescents’ social functioning and depressive symptoms. *Journal of Youth & Adolescence, 37*, 941–952. https://doi.org/10.1007/s10964-006-9147-1

Liang, Y., Dou, K., Peng, X., & Nie, Y. (2019). The influence of parental attachment on the honesty behavior in adolescents: The multiple mediating effects of self-esteem and interpersonal trust (in Chinese). *Advances in Psychology, 9*(12), 1976-1984. https://doi.org/10.12677/ap.2019.912237

Liberska, H., Głogowska, K., & Deja, M. (2016). Przywiązanie do rodziców i rówieśników jako predyktor samooceny w okresie adolescencji [Attachment to parents and peers as a predictor of self-esteem in adolescence]. *Czasopismo Psychologiczne, 22*(2), 219-227.

Lieberman, M., Doyle, A.B., & Markiwicz, D. (1999). Developmental patterns in security of attachment to mother and father in late childhood and early adolescence: Associations with peer relations. *Child Development, 70*(1), 202-213. https://doi.org/10.1111/1467-8624.00015

Lien, C. H. (2012). *Relationships among attachment, emotion regulation, and
depression of college students* (in Chinese) [Unpublished master thesis]. National Taichung University.

Lin, C. C. (2020). Attachment and life satisfaction in young adults: The mediating effect of gratitude. *Current Psychology, 39*, 1513–1520. https://doi.org/10.1007/s12144-019-00445-0

Lin, C. H. (2014, October). *Family stress and adaptation among youth in Southern Taiwan*. Paper presented at the Annual Meeting of American Association of Chinese Studies, Washington D.C. Retrieved January 21, 2021, from <http://aacs.ccny.cuny.edu/2014conference/Papers/Cheng-Hsien%20Lin.pdf>

Lisinskiene, A., & Juskeliene, V. (2019). Links between adolescents’ engagement in physical activity and their attachment to mothers, fathers, and peers. *International Journal of Environmental Research and Public Health, 16*, 866. https://doi.org/10.3390/ijerph16050866

Liu, F., Chui, H., & Chung, M. C. (2020). The effect of parent– adolescent relationship quality on deviant peer affiliation: The mediating role of self-control and friendship quality. *Journal of Social and Personal Relationships, 37*(10-11), 2714-2736. https://doi.org/10.1177/0265407520937358

Liu, Y.-L. (2006). Paternal/maternal attachment, peer support, social support expectations, and depressive symptoms. *Adolescence, 41*(164), 705-721.

Lo, A. (2017). *Adoptive parenting cognitions, compatibility, and attachment among domestically adoptive families* [Unpublished master thesis]. University of Massachusetts Amherst.

Loera, D.I. (2019). 0*Examining relationship interactions of adult children of alcoholics* [Unpublished master thesis]. California Polytechnic State University.

Long, J., Li, S., & Xiaoqian, D. (2018). The relationship between adolescent parental attachment and autobiographical memory (in Chinse). *Hans, 8*(4), 24442.

Louder, L. A. (2007). *Attachment and adolescent psychopaLuft, thology in a correctional setting*. [Unpublished doctoral dissertation]. Marshall University.

Louro, L. M. G. (2013). *Attachment and self-concept in school children: Family vs. institutionalization* (in Portuguese) [Unpublished master thesis]. Universidade Lusófona de Humanidades e Tecnologias.

Love, S., & Kurpius, S. E. R. (2022). Childhood sexual abuse and coping as young adults: The roles of attachment and mattering. *Journal of Interpersonal Violence, 37*(7-8), NP4933.NP4931-NP4951. https://doi.org/10.1177/0886260520958647

# Lowell, A., Renk, K., & Adgate, A. H. (2014). The role of attachment in the relationship between child maltreatment and later emotional and behavioral functioning. *Child Abuse & Neglect, 38*(9), 1436-1449. https://doi.org/10.1016/j.chiabu.2014.02.006

Ļubenko, J., & Sebre, S. (2007). Adolescents’ identity achievement, attachment to parents and family environment. *Baltic Journal of Psychology, 2007, 8*(1-2), 37–48.

# Luft, G. A. (1989). *Attachment, self, and parental acceptance-rejection in relation to adolescent personality* [Unpublished dissertation]. Texas Tech University.

Lukas, L., Buhl, C., Schulte‑Körne, G., & Sfarlea, A. (2022). Family, friends, and feelings: the role of relationships to parents and peers and alexithymia in adolescents with anorexia nervosa. *Journal of Eating Disorders, 10,* 143*.* https://doi.org/10.1186/s40337-022-00661-3

# Luthar, S. S., & Goldstein, A. S. (2008). Substance use and related behaviors among suburban late adolescents: The importance of perceived parent containment. *Development and Psychopathology, 20*(2), 591-614. https://doi.org/10.1017/S0954579408000291

Luthar, S.S., Suh, B.C., Ebbert, A.M., & Kumar, N.L. (2020). Students in high-achieving schools: Perils of pressures to be “standouts.” *Adversity and Resilience Science, 1*, 135–147. https://doi.org/10.1007/s42844-020-00009-3

Lyle, P. N. (2006). *Adult males with childhood sexual experiences: The role of attachment and coping in psychological adjustment* [Unpublished doctoral dissertation]. Auburn University.

Ma, C. Q., & Huebner, E. S. (2008). Attachment relationships and adolescents' life satisfaction: Some relationships matter more to girls than boys. *Psychology in the Schools, 45*(2), 177-190.https://doi.org/ 10.1002/pits.20288

Ma, J.-S., Park, J.-H., & Kang, Y.-S. (2011). Relationship between parent attachment and parent motivation of university student (in Korean). *Journal of Korea Academia-Industrial Cooperation Society, 12*(1), 200-206.

Macía, L., Estévez, A., & Jáuregui, P. (2022). Gambling: Exploring the role of gambling motives, attachment and addictive behaviours among adolescents and young women. *Journal of Gambling Studies*. https://doi.org/10.1007/s10899-022-10124-8

Macdonald, J. A., Greenwood, C. J., Letcher, P., Spry, E. A., Mansour, K., McIntosh, J. E. … Olsson, C. A. (2021). Parent and peer attachments in adolescence and paternal postpartum mental health: Findings from the ATP Generation 3 Study. *Frontiers in Psychology, 12*, 672174. https://doi.org/10.3389/fpsyg.2021.672174

Madureira, P. M. (2011). *A Qualidade da Vinculação ao Pai e à Mãee o Fenómeno de Retraimento Social em Pré-Adolescentes* [The quality of attachment to father and mother and the phenomenon of social retractation in pre-adolescents] [Unpublished doctoral dissertation]. ISPA Instituto Universatio.

Magro, L. D. (2012). *Acogimiento Residencial Conductas Exteriorizadas-Interiorizadas y
Evaluación del Apego* [Residential foster care: Externalizing-Internalizing behaviors and attachment assessment] [Unpublished dissertation]. Autonomeous University of Barcelona.

Maharani, E. P. (2018). *Parental attachment and socioemotional health in adolescence* (in Indonesian) [Unpublished bachelor thesis]. Islamic University of Indonesia.

Mahzoonien, S., & Yousefi, Z. (2017). Analyzing multiple relationships between psychological, social, and family factors and the academic success of female high school students in Isfahan. International *Journal of Education al and Psychological Researches, 3*(1), 21-28.

Maia, M. A. S. (2014). *Solidão e padrões de vinculação aos pais na adolescência* [Loneliness and attachment patterns to parents in adolescence] [Unpublished master thesis]. Universityof Lisbon.

Maier, M. A., Bernier, A., Pekrun, R., Zimmermann, P., & Grossman, K.E. (2004). Attachment working models as unconscious structures: An experimental test. *International Journal of Behavioral Development, 28*(2), 180–189. https://doi.org/10.1080/01650250344000398

Maiocchi, G. F. P., & Bustamante, E. M. Z. (2021). Relación del Funcionamiento Familiar y Apego en Adolescentes Escolares de una Institutión Educative Publica de Ate [Relationship between family functioning and attachment in teenage
students from a state school in Ate]. *Avances en Psicología, 29*(2), 241-251. https://doi.org/10.33539/avpsicol.2021.v29n2.2411

Mancinelli, E., Liberska, H.D., Li, J.-B., Espada, J.P., Delvecchio, E., Mazzeschi, C., Lis, A., & Salcuni, S.A. (2021a). Cross-cultural study on attachment and adjustment difficulties in adolescence: The mediating role of self-control in Italy, Spain, China, and Poland. *International Journal of Environmental Research and Public Health, 18*, 8827. https://doi.org/10.3390/ijerph18168827

Mancinelli, E., Li, J.-B., Lis, A., & Salcuni, S. (2021b). Adolescents’ attachment to parents and reactive–proactive aggression: The mediating role of alexithymia. *International Journal of Environmental Research and Public Health,* 18, 13363. https://doi.org/10.3390/
ijerph182413363

Manfroi, E. C. (2012). *Perception of the quality of parental attachment and friendship between peers as predictors of self-perception in pre-adolescents* (in Portuguese) [Unpublished dissertation]. Universidade Federal de Santa Catarina.

Manhas, S., & Roshan, A. (2015). Parental and peer attachment among adolescents of Jammu. *International Journal of Current Research, 7*(6), 16667-16669.

Mansour, M.S ., & Sabeti, G. (2012). Relation between attachment to parents and same ages with autonomy of adolescences. *International Journal of Fundamental Psychology and Social Sciences, 2*(4), 80-86.

Marcial, J. F. d. J. (2016). *Vinculacao, ansiedade social e crencas sociais nos jovens adultos* [Attachment, anxiety, and social beliefs in young adults] [Unpublished dissertation]. Universidade Lusófona de Humanidades e Tecnologias.

Marcus, R. F., & Betzer, P. D. S. (1995). Attachment and antisocial behavior in early adolescence. *Journal of Early Adolescence*, *16*(2), 229-248. https://doi.org/10.1177/0272431696016002006

Marcus, R. F., & Mirle, J. (1990). Validity of a child interview measure of attachment as used in child custody evaluations. *Perceptual and Motor Skills, 70*(3), 1043-1054. https://doi.org/10.2466/pms.1990.70.3.1043

Margolese, S. K., Markiewicz, D., & Doyle, A. B. (2005). Attachment to parents, Best friend, and romantic partner: Predicting different pathways to depression in adolescence. *Journal of Youth and Adolescence, 34*(6), 637-650. https://doi.org/10.1007/s10964-005-8952-2

Mariano, S. D. C. (2015). *As Relações da Vitimização na Adolescência em Meio Escolar com a Qualidade da Vinculação e as Práticas Parentais* [The relationships of victimization in adolescence in the school environment with the quality of attachment and parental practices] [Unpublished master thesis]. ISPA Instituto Universario.

Marino, C., Marci, T., Ferrante, L., Altoe, G., Vieno, A., Simonelli, A. … Spada, M. M. (2019). Attachment and problematic Facebook use in adolescence: The mediating role of metacognitions. *Journal of Behavioral Addictions, 8*(1), 63-78. https://doi.org/10.1556/2006.8.2019.07

Markiewicz, D., Doyle, A. B., & Brendgen, M. (2001). The quality of adolescents’ friendships: Associations with mothers’ interpersonal relationships, attachments to parents and friends, and prosocial behaviors. *Journal of Adolescence, 24*(4), 429–445. https://doi.org/10.1006/jado.2001.0374

Markiewicz, D., Lawford, H., Doyle, A. B., & Haggart, N. (2006). Developmental differences in adolescents’ and young adults’ use of mothers, fathers, best friends, and romantic partners to fulfill attachment needs. *Journal of Youth and Adolescence, 35*(1), 127-140. https://doi.org/10.1007/s10964-005-9014-5

Marks, C. (2014). *The relationship of parental attachment, parental support, and parental acceptance of LGB identity with self-compassion and emotional distress* [Unpublished master thesis]. Oklahoma State University.

Marques, F. J. d. A. (2009). *Attachment and bullying: a comparative study of institutionalized and non-institutionalized children and adolescents* (in Portuguese) [Unpublished master thesis]. University of Porto.

Mattanah, J. F., Hancock, G. R., & Brand, B. L. (2004). Parental attachment, separation-individuation, and college student adjustment: A structural equation analysis of mediational effects. *Journal of Counseling Psychology, 51*(2), 213-225. https://doi.org/10.1037/0022-0167.51.2.213

Mbhalati, N.P. (2012). *Attachment and idealization of pregnancy and parenting, attitudes toward pregnancy and parenting readiness among school-going female teenagers* [Unpublished master thesis]. University of Limpopo.

McAuliffe, C. E. (2010). *“It’s about give and take”: The importance of parental felt obligations in adolescence* [Unpublished dissertation]. Bowling Green State University.

McCabe, A. L. (2017). *Relationship of parent attachment and parenting behaviors on social achievement goals endorsed by emerging adults* [Unpublished doctoral dissertation]. Oklahoma State University.

McCarthy, C. J., Brack, G., & Brack, C. J. (1996). Relationships of cognitive appraisals and attachment to emotional events within the family of origin. *The Family Journal, 4*(4), 316-326.

McCarthy, C. J., Lambert, R. G., & Moller, N. P., McCarthy, C.J, Lambert, R.G., & Seraphine, A.E. (2001, April 10-14). *Relationship of psychological coping resources and attachment to negative emotions experienced by college students following parental conflict*. Paper presented at the Annual Meeting of the American Educational Research Association, Seattle, WA. Retrieved January 18, 2021, from <https://files.eric.ed.gov/fulltext/ED451461.pdf>

McCarthy, C.J, Lambert, R.G., & Moller, N.P. (2006). Preventive resources and emotion regulation expectancies as mediators between attachment and college students’ stress outcomes. *International Journal of Stress Management, 13*(1), 1-22. https://doi.org/10.1037/1072-5245.13.1.1

McCarthy, C. J, Lambert, R. G., & Seraphine, A. (2004). Adaptive
family functioning and emotion regulation capacities as predictors of college students' appraisals and emotion valence following conflict with their parents. *Cognition and Emotion, 18*(1), 97-124. https://doi.org/10.1080/02699930244000417

McCormick, C. B., & Kennedy, J. H. (1994). Parent–child attachment working models and self-esteem in adolescence. *Journal of Youth & Adolescence, 23*(1), 1–18. https://doi.org/10.1007/BF01537139

McGinley, M., & Evans, A. M. (2020). Parent and/or peer attachment? Predicting emerging adults’ prosocial behaviors and internalizing symptomatology. *Journal of Child and Family Studies, 29*(7), 1833-1844. https://doi.org/10.1007/s10826-020-01715-3

McGinley, M., Muzzy, B.M., Hermann, M., & Thompson, R.A. (2023). Secure attachment and social and personality outcomes: The moderating role of emerging adults’ autobiographical memories of parents. *Social Development, 32*(1), 329-347. https://doi.org/10.1111/sode.12624

McKay-Killingbeck, S. L. (2007). *Individual differences in adolescent voluntary and involuntary responses to psychosocial stress* [Unpublished doctoral dissertation]. University of New Brunswick.

McKillop, N. K. (2012). *The origins of child sexual abuse: An analysis of developmental and situational factors*. [Unpublished doctoral dissertation]. Griffith University.

McKinney, K. G. (2002). Engagement in community service among college students: is it affected by significant attachment relationships? *Journal of Adolescence, 25*, 139-154. https://doi.org/10.1006/jado.2001.0465

McNamara, J. K., Willoughby, T., & Chalmers, H. (2005). Psychosocial status of adolescents with learning disabilities with and without comorbid attention deficit hyperactivity disorder. *Learning Disabilities Research & Practice, 20*(4), 234–244.

McWilliams, L. A. (2004). *Evaluating attachment theory as a framework for understanding pain-related appraisals and interpersonal concern* [Unpublished dissertation]. University of Manitoba.

### Mena, C. C. (2015). *Influence of family functioning on internalizing problems in children of parents with CMC* [Unpublished master thesis]. University of Leiden.

Meng, Y., Yao, R., Fu, L., Wu, L., & Li, T. (2018). The analysis of the mediating effect of emotion management between attachment and interaction anxiety in rural junior school students (in Chinese). *Journal of Bengbu Medical College, 43*(7), 933-937. https://doi.org/10.13898/j.cnki.issn.1000鄄2200.2018.07.027

Mereish, E. H. (2008). *An instrument development study of men’s planning for career and family: Contributions of parental attachment and gender role conflict* [Unpublished master thesis]. University of Maryland.

Miano, P., Ingoglia, S., Campo, M. C., & Logiuoco, C. (2017). Il legame di attaccamento ai genitori e ai pari come predittore dell'autostima e dell'ego-resiliency [Attachment with parents and peers as a predictor of self-esteem and ego-resiliency]. Psicologia Clinica dello Sviluppo, 21(2), 219–236.

Michalčáková, R., Lacinová, L., Bouša, O., & Kotková, M. (2010). Strachy a Citova Vazba k Rodicum v Obdobi Rane Adolescence [Fears and parental attachment in early adolescence]. *E*-*Psychologie, 4*(1), 16-29.

Michiels, D., Grietens, H., Onghena, P., & Kuppens, S. (2010). Perceptions of maternal and paternal attachment security in middle childhood: Links with positive parental affection and psychosocial adjustment. *Early Child Development and Care, 180*(1-2), 211-225. https://doi.org/10.1080/03004430903415064

Miljkovitch, R., Danner-Touati, C., Gery, I., Bernier, A., Sirparanta, A., & Deborde, A. S. (2022). The role of multiple attachments in intergenerational transmission of child sexual abuse among male victims. *Child Abuse & Neglect, 128,* 104864. https://doi.org/10.1016/j.chiabu.2020.104864

Miljkovitch, R., Deborde, A.-S., Bernier, A., Corcos, M., Speranza, M., & Pham-Scottez, A. (2018). Borderline personality disorder in adolescence as a generalization of disorganized attachment. *Frontiers in Psychology, 9*, 1962. https://doi.org/ 10.3389/fpsyg.2018.01962

Miljkovitch, R., Moss, E., Bernier, A., Pascuzzo, K., & Sander, E. (2015). Refining the assessment of internal working models: The Attachment Multiple Model Interview. *Attachment & Human Development, 17*(5), 492-521. https://doi.org/10.1080/14616734.2015.1075561

Mogjan, F. N., Kadir, R. A., Noah, S. M., & Hassan, S. A. (2013). The relation of career indecision and parental attachment among Iranian undergraduate students. *International Journal for the Advancement of Counselling, 35*, 251-260. https://doi.org/10.1007/s10447-012-9180-6

Mohammadi, T., & Saber, S. (2018). The mediating role of self-concept in relation between attachment to parents and peers with prosocial behaviors [In Farsi]. *Quarterly
of Applied Psychology, 12*(3), 396-417.

Mohammadzadeh, M., Awang, H., Jun, C.Y., Hashim, N.F., & Premkumar, A. (2020). Relationship between attachment styles and risk behavior (smoking and bullying) among secondary school students: An experience from Hulu Langat, Malaysia. *Iran Journal of Public Health, 49*(10), 2006–2008. https://doi.org/10.18502/ijph.v49i10.4708

Mohr, A. F. (1998). *Adolescent substance-abuse: Vulnerability and protective factors from a developmental perspective* [Unpublished doctoral dissertation]. University of Calgary.

Moller, N. P., Fouladi, R. T., McCarthy, C., & Hatch, K. (2003). Relationship of attachment and social support to college students' adjustment following relationship breakup. *Journal of Counseling and Development, 81*, 354-369.

Möller, J., & Pilman, N. (2010). *Attachment in children and adolescents—a comparison between a clinical and a normal group* [Unpublished manuscript]. University of Göteborg: Department of Psychology.

# Mónaco, E., de la Barrera, U., & Montoya-Castilla, I. (2021). Parents and peer attachment and their relationship with emotional problems in adolescence: Is stress mediating? *Revista de Psicología Clínica con Niños y Adolescentes, 8*(3), 67-73. https://doi.org/10.21134/rpcna.2021.08.3.8

# Mónaco, E., Schoeps, K., & Montoya-Castilla, I. (2019). Attachment styles and well-being in adolescents: How does emotional development affect this relationship? International Journal of Environmental Research and Public Health, 16(14), 2554. https://doi.org/10.3390/ijerph16142554

Montoya-Castilla, I., Trejo, L. L., López, A. O., & Barrón, F.G. (2015). Vinculos de Apego e Inteligencia Emotionalen la Adolescencia [Bonds of attachment and emotional intelligence in adolescence]. In G. Buelo-Casal, J. C. Sierra, & T. Ramiro-Sánchez (Eds.), *Proceedings of 8th International and 13th National Congress of Clinical Psychology* (pp. 23-29) Asociación Española de Psicología Conductual.

Moon, S.-H., & An, H.-J. (2013). Anger and psychosomatic symptoms in multi-cultural families: The mediating effect of parental attachment (in Korean). *Journal of Korean Society for School Health Education, 14*(1), 37-47.

Morsünbül, Ü. (2019). Determining the demographic and psychosocial factors that influence smoking addiction. *Addicta, 6*(1), 163-173. https://doi.org/10.15805/addicta.2019.6.1.0072

Mosley, M. A., Su, T., & Parker, M. L. (2022). Attached to technology: Exploring young
adults’ attachments to parents, partners, and phones. *The Family Journal*: *Counseling and Therapy four Couples and Families, 30*(3), 450-458. https://doi.org/10.1177/10664807211063193

Mota, S. F. S. (2018). *Parental attachment and love: A study with young adults* (in Portuguese). Unpublished master thesis]. ISPA Institute.

Mota, C. P., & Matos, P. M. (2009). Apego, conflito e auto-estima em adolescentes de famílias intactas e divorciadas [Attachment, conflict and self-esteem in adolescents from intact and divorced families]. *Psicologia: Reflexão e Crítica, 22*(3), 344-352.

Mothander, P. R., & Wang, M. (2014). Parental rearing, attachment, and social anxiety in Chinese adolescents. *Youth & Society, 46*(2) 155–175. https://doi.org/10.1177/0044118X11427573

Moura, O., & Matos, P. M. (2008). Vinculação aos pais, divórcio e conflito interparental em adolescentes [Attachment to parents, divorce and interparental conflict in adolescents]. *Psicologia, 22*(1), 127-152. https://doi.org/10.17575/rpsicol.v22i1.341

Moyano, N., Valez, K., Arias, A., & Sanchez-Fuentes, M. d. M. (2020). Two pathways to suicidal intention in Ecuadorian adolescents: The role of parental and peer attachment, depression and impulsivity. *Current Psychology*. https://doi.org/10.1007/s12144-020-00757-6

Mubarique, M. (2016). *Examining the role of emotion regulation and the role of the impediment in the way adolescents trust their parents and positive social treatments* (in Turkish) [Unpublished master thesis]. University of Ankara.

Mudzkiyyah, L., & Nuriyyatiningrum, N. A. H. (2021). Parental and peer attachment to moral intelligence among adolescents in Semarang city. In H. H. Kusuma, N. Ahmad, B. Bukhori, N. F. Zaki, & R. Rahim (Eds.), *Procedings of the first international conference on Islamic history and civilization* (pp. 205-214). Semarang, EAI. https://doi.org/10.4108/eai.14-10-2020.2303837

Mukherjee, S., Mallick, A., & Biswas, S. (2021). Effects of massively multiplayer online role-
playing games on psychological health and inter-personal relationships of the male youth: A cross-sectional study in sub-urban Kolkata, West Bengal, India. *Anthropological Review, 84*(2), 163–179. https://doi.org/10.2478/anre-2021-0010

Mullen, J. (2013). *Can family composition influence self-esteem, altruism, parental and peer attachment and views of marriage?* [Unpublished bachelor thesis]. Dublin: DBS School of Arts.

Mulvaney, M. K., &Mebert, K. J. (2010). Stress appraisal and attitudes towards corporal punishment as intervening processes between corporal punishment and subsequent mental health. *Journal of Family Violence, 25*(4), 401–412. https://doi.org/10.1007/s10896-009-9301-0

Muzi, S., Pace, C. S., & Steele, H. (2022). The Friends and Family Interview converges with the Inventory of Parent and Peer Attachment in community but not institutionalized
adolescents. *Journal of Child and Family Studies, 31*, 518–529.
https://doi.org/10.1007/s10826-021-02181-1

Nabeel, T., & Zafar, H. (2011). Parental attachment and proactive attitude among adolescents. *JPAIR Multidisciplinary Journal, 7*, 281-301.

Nadia, A.I., & Wijaya, H.E. (2016). *Correlation between parent attachment with self-adjustment of oversea college students of FPSB at Islamic University Indonesia* [in Indonesian] [unpublished thesis]. Islamic University Indonesia.

Nalbant, K., Kalayci, B. M., & Akdemir, D. (2020). Attachment security and perceived expressed emotion in adolescents with anorexia nervosa. *Turkish Journal of Psychiatry*, *31*(1), 25-33. https://doi.org/10.5080/u32602

Napoleon, J. S. (2022). *Internal and relational pathways to resilience and coping among youth experiencing homelessness* [Unpublished dissertation]. McGill University.

Natarajan, G. (2013). Differences in internalizing and externalizing problems among early adolescent subtypes based on attachment security. *Psychological Studies, 58*(2), 122–132. https://doi.org/10.1007/s12646-013-0179-9

Natarajan, G., Somasundaram, C. P., & Sundaram, K. R. (2011). Relationship between attachment security and rejection sensitivity in early adolescence. *Psychological Studies, 56*(4), 378–386. https://doi.org/10.1007/s12646-011-0108-8

# Nejat, A., Shahabizadeh, F., & Bonab, B. G. (2015). The role of self-image in the relationship between perceived attachment with mental health in students (in Farsi). *Quarterly Journal of Psychological Studies, 10*(4), 73-99.

Nelson, S. M., & Rubin, S. (1997). Sex differences, parental attachment, and juvenile delinquency. *Journal of Police and Criminal Psychology, 12*, 28-34. https://doi.org/10.1007/BF02806699

Nicholson, T. R. (1999). *Attachment style in young offenders; parents, peers, & delinquency* [Unpublished doctoral dissertation]. University of Victoria.

Nickerson, A. B., Mele, D., & Princiotta, D. (2008). Attachment and empathy as predictors of roles as defenders or outsiders in bullying interactions. *Journal of School Psychology, 46*(6), 687–703. https://doi.org/10.1016/j.jsp.2008.06.002

# Nie, Y.-G., Nie, J.-B., & Vazsonyi, A. T. (2016). Self-control mediates the associations between parental attachment and prosocial behavior among Chinese adolescents. *Personality and Individual Differences, 96*, 36-39. https://doi.org/10.1016/j.paid.2016.02.077

Nikiforou, M., Georgiou, S. N., & Stavrinides, P. (2013). Attachment to parents and peers as a parameter of bullying and victimization. *Journal of Criminology, 2013*, 484871. https://doi.org/10.1155/2013/484871(2008).

Nivedha, K. (2014). Test construction to measure misbehavior and correlational study on helicopter parenting and parental attachment among adolescent students. *International Journal of Current Research and Academic Review, s5*, 80-85.

Noom, M. J., Deković, M., & Meeus, W. H. (1999). Autonomy, attachment and psychosocial adjustment during adolescence: A double-edged sword? *Journal of Adolescence, 22*(6), 771–783. https://doi.org/10.1006/jado.1999.0269

Nunes, F., Mota, C. P., Ferreira, T., Schoon, I., & Matos, P. M. (2022). Parental meta-emotion, attachment to parents, and personal agency in adolescents. *Journal of Family Psychology, 36*(6), 964-974. https://doi.org/ 10.1037/fam0000947

Nunes, S. A. N., Faraco, A. M. X., & Vieira, M. L. (2013). Attachment and parental practices as predictors of behavioral disorders in boys and girls. *Paideia, 23*(56), 369-377. https://doi.org/10.1590/1982-43272356201311

Nurikhyana, D., Daud, M., & Rifani, R. (2022). Kelekatan dan Keterbukaan Diri Remaja di Kota Makassar pada Situasi Pandemi Covid-19 [Adolescent self-disclosure and attachment in Makassar City in the Covid-19 pandemic situation]. *Jurnal Psikologi Talenta Mahasiswa, 2*(1), 80-96.

Obeldobel, C. A., & Kerns, K. A. (2020). Attachment security is associated with the experience of specific positive emotions in middle childhood. *Attachment & Human Development, 22*(5), 555-567. https://doi.org/10.1080/14616734.2019.1604775

O’Brien, K. (1996). The influence of psychological separation and parental attachment on the Career development of adolescent women. *Journal of Vocational Behavior, 48*(3), 257-274. https://doi.org/10.1006/jvbe.1996.0024

O'Brien, K. M., Friedman, S. M., Tipton, L. C., & Linn, S. G. (2000). Attachment, separation, and women's vocational development: A longitudinal analysis. *Journal of Counseling Psychology, 47*(3), 301-315. doi10.1037//O022-O167.47.3.301

Offer, L. K. (1997). *The relationship among attachment style, self-esteem, and violence among incarcerated male inmates* [Unpublished dissertation]. University of Southern California.

Öğretir-Özçelik, A. D. (2017). The comparative analysis of the perceptions of parental styles and attitudes and parental attachment of university students. *International Journal of Psycho-Educational Sciences, 6*(1), 23-35.

Okello, J., Nakimuli-Mpungu, E., Klasen, F., Voss, C., Musisi, S., Broekaert, E., Derluyn, I. (2015). The impact of attachment and depression symptoms on multiple risk-behaviors in post-war adolescents in northern Uganda. *Journal of Affective Disorders, 180*, 62-67. https://doi.org/10.1016/j.jad.2015.03.0520165-0327/&201

Olegario, L. C. (2009). Parental attachment, coping style, and trait emotional self-efficacy as antecedents of school attachment. *Alipato: A Journal of Basic Education, 3*(3), 39-53.

Oliveira, J., & Costa, M.E. (2005). Estilos de Vinculacao e Percepcoes de Satisfacao com os Papeis Parental e Conjugal em Triades de Familias Intactas [Attachment styles and perceptions of satisfaction with parental and marriage roles in triads of intact families]. *Psicologia, 18*(2), 57-74.

Omidvar, B., Bahrami, F., Fatehizade, M., Etemadi, O., & Ghanizadeh, A. (2014). Attachment quality and depression in Iranian adolescents. *Psychological Studies, 59*(3), 309–315. https://doi.org/10.1007/s12646-014-0250-1

Oral, T., & Karababa, A. (2020). Attachment to parents as a predictor of
multidimensional life satisfaction among adolescents. *Sakarya University Journal of Education, 10*(1), 53-66. https://doi.org/10.19126/suje.556420

Orloff, E., Soto, D., & Polo, A. (2017). *Associations between parental attachment and depression in middle-school students* [Unpublished manuscript]. DePaul University. Retrieved January 2, 2021, from <https://via.library.depaul.edu/psychologynight/51/>

Orzolek-Kronner, C. (2002). The effect of attachment theory in the development of eating disorders: Can symptoms be proximity-seeking? *Child and Adolescent Social Work Journal, 19*, 421-435.

Özdemir, C. (2012). *Some changes in teacher acceptance-rejection: Reviews from the heart* (in Turkish) [Unpublished master thesis]. Maltepe University.

Özdemir, Y., & Koruklu, N. (2013). İlk Ergenlikte Ana-Babaya Bağlanma, Okula Bağlanma ve Yaşam Doyumu [Parental attachment, school attachment and life satisfaction in early adolescence]. *Elementary Education Online, 12*(3), 836‐848.

Özgüle, E. T. U. (2011). *Mediating role of self-regulation between parenting, attachment, and adjustment in middle adolescence* [Unpublished doctoral dissertation]. Middle East Technical University.

Özgüngör, S. (2020). The analysis of the relationships of attachment to mothers and fathers and achievement goal orientation and life satisfaction of adolescents. *Education and Science, 45*, 253-273. https://doi.org/10.15390/EB.2020.8697

Pace, C. S., San Martini, P., & Zavattini, G.C. (2011). The factor structure of the Inventory of Parent and Peer Attachment (IPPA): A survey of Italian adolescents. *Personality and Individual Differences, 51*(2), 83-88. https://doi.org/10.1016/j.paid.2011.03.006

Paez, A., & Rovella, A. (2019). Vínculo de apego, estilos parentales y empatía en adolescentes [Attachment, parental styles and empathy in adolescent]. *Interdisciplinaria, 36*(2), 23-38

Pan, Y., Hu, Y., Zhang, D., Ran, G., Li, B., Liu, C. … Chen, W. (2017). Parental and peer attachment and adolescents' behaviors: The mediating role of psychological sushi in a longitudinal study. *Children and Youth Services Review, 83*, 218-225.

Pan, Y., Zhang, D., Liu, Y., Ran, G., & Ten, Z. (2016). Different effects of paternal and maternal attachment on psychological health among Chinese secondary school students. *Journal of Child and Family Studies, 25*(10), 2998-3008. https://doi.org/10.1007/s10826-016-0463-0

Pao, J.Y. (1996). *Parent-adolescent attachment and associations with adolescent identity development* [Unpublished doctoral dissertation]. University of Massachusetts.

Papini, D. R., Roggman, L., & Anderson, J. (1991). Early-adolescent perceptions of attachment to mother and father: A test of the emotional distancing and buffering hypothesis. *Journal of Early Adolescence, 11*(2), 258-275. https://doi.org/10.1177/0272431691112006

Pardo, M. E., Pineda, S., Carrillo, S., & Castro, J. (2006). Análisis psicométrico del inventario de apego con padres y pares en una muestra de adolescentes Colombianos. [Psychometric analysis of the inventory of parent and peer attachment in a sample of Colombian adolescents].*Revista Interamericana de Psicología, 40*(3), 289-302.

Parent-Boursier, C., & Hébert, M. (2010). La perception de la relation pe`re-enfant et l’adaptation des enfantssuite au de ́voilement d’une agression sexuelle [Perception of child-to-child relationship and children's adjustment to sexual assault]. *Canadian Journal of Behavioural Science, 42*(3), 168-176. https://doi.org/10.1037/a0017691

Parent-Boursier, C., & Hébert, M. (2014). L’Influence de la Relation au Père et à la Mère sur le Troubles de Comportement des Enfants Victimes d’Agression Sexuelle : Une étude de suivi [The influence of relationship to father and mother on child behaviour disorders victims of sexual assault : A follow-up study]. *Journal International De Victimologie, 12*(1), 26-39.

Parent-Boursier, C., & Hébert, M. (2015). Security in father-child relationship and behavior problems in sexually abused children. *Journal of Family Violence, 30*(1), 113–122. https://doi.org/10.1007/s10896-014-9653-y

Park, B., Shin, N., Yun, K., Kim, M., Kim, S., & Yoon, S.-Y. (2017). The relationships among mothers’ childhood attachment to parents, marital satisfaction, and psychological well-being. *Korean Journal of Child Studies, 38*(5), 67-80. https://doi.org/10.5723/kjcs.2017.38.5.67

Park, H.-K., & Kang, I. S. (2012). The effect of child-parent attachment on children’s mutual friendships and mutual antipathy relations (in Korean). *Journal of the Korean Home Economics Association, 50*(8), 53-63. https://doi.org/10.6115/khea.2012.50.8.05

Park, K. M. & Park, H. (2015). Effects of self-esteem improvement program on self-esteem and peer attachment in elementary school children with observed problematic behaviors. *Asian Nursing Research, 9*, 53-59. https://doi.org/10.1016/j.anr.2014.11.003

Parrigon, K. L. S., & Kerns, K. A. (2016). Family processes in child anxiety: The long-term impact of fathers and mothers. *Journal of Abnormal Child Psychology, 44*(7), 1253–1266. https://doi.org/10.1007/s10802-015-0118-4

Parsa, N., Yaacob, S. N., Redzuan, M., Parsa, P., & Esmaeili, N. S. (2014). Parental attachment, inter-parental conflict and late adolescent’s self-efficacy. *Asian Social Science, 10*(8), 123-131. https://doi.org/10.5539/ass.v10n8p123

Pasma, D. (2008). *Assessing the relations between attachment and psychopathic traits in a sample of adolescents: Is it mediated by delinquency* [Unpublished master thesis]. University of New Brunswick.

Paterson, J. E., Field, J., & Pryor, J. (1994). Adolescents’ perceptions of their attachment relationships with their mothers, fathers and friends. *Journal of Youth & Adolescence, 23*(5), 579–600. https://doi.org/10.1037/0022-3514.48.4.991

Patowary, P., & Gopalan, R.T. (2019). Psychosocial profile of juvenile delinquents. *International Neuropsychiatric Disease Journal, 13*(1), 1-10.

Pawulan, A. J., Loekmono, J. T. L., & Irawan, S. (2018). *Hubungan Antara Kellekatan Orangtua Degan Regulasi Emosi Remaja Pondok Pesantren Agro „Nuur El-Fallah“ Salatiga* [The relationship between parental attachment and emotional regulation of adolescent from islamic boarding school Agro „Nuur El-Fallah“ Salatiga]. *Jurnal Psikologi Konseling, 13*(2), 231-248. https://doi.org/10.24114/konseling.v13i2.12194

Pearce, C. D. (2009). *Daughter-to-father attachment, daughter-to-mother attachment and emotion regulation in college females* [Unpublished master thesis]. Auburn University.

Pearson, J. C., & Child, J. T. (2007). A cross-cultural comparison of parental and peer attachment styles among adult children from the United States, Puerto Rico, and India. *Journal of Intercultural Communication Research, 36*(1), 15-32. https://doi.org/10.1080/17475750701265258

Penagos, A., Rodríguez, M., Carrillo, S., & Castro, J. (2006). Apego, relaciones románticas y autoconcepto en adolescentes Bogotanos [Attachment, romantic relationships and self-concept of adolescents from Bogotá].*Universitas Psychologica, 5*, 21-36.

Perrone, K. M., Webb, L. K., & Jackson, Z. V. (2007). Relationships between parental attachment, work and family roles, and life satisfaction. *Career Development Quarterly, 55*(3), 237-248. https://doi.org/10.1002/j.2161-0045.2007.tb00080.x

Peter, D., & Gazelle, H. (2017). Anxious solitude and self-compassion and self-criticism trajectories in early adolescence: Attachment security as a moderator. *Child Development, 88*(6), 1834–1848. https://doi.org/10.1111/cdev.12926

Peterson, R. D. (2011). *Separate ways, worlds apart: Exploring changes in first-generation college student attachment levels* [Unpublished master thesis]. University of Wisconsin-La Crosse.

Piermattei, C., Pace, C. S., Tambelli, R., & D’Onofrio, E. (2017). Late adoptions: Attachment security and emotional availability in mother–child and father–child dyads. *Journal of Child and Family Studies, 26*, 2114–2125. https://doi.org/10.1007/s10826-017-0732-6

Pilley, T. (1999). *A psychometric study of the Child Attachment Interview: Reliability and validity* [Unpublished doctoral dissertation]. University College University.

Pine, A., Shank, L.M., Burke, N. L., Neyland, M. K. H., Schvey, N. A., Quattlebaum, M. … Tanofsky-Kraff, M. (2020). An examination of the interpersonal model in adolescent military-dependents at high-risk for adult obesity. *American Journal of Psychotherapy, 73*(2), 43–49. https://doi.org/10.1176/appi.psychotherapy.20190034

Pittman, L. D., & Richmond, A. (2007). Academic and psychological functioning in late adolescence: The importance of school belonging. *Journal of Experimental Education*, *75*(4), 270–290. https://doi.org/10.3200/JEXE.75.4.270-292

Polkovnikova-Wamoto, A. (2014). *A study of attachment styles among children aged from 8 to 14 years in Nairobi, Kenya* [Unpublished master thesis]. University of Nairobi.

Ponti, L., & Smorti, M. (2019). The roles of parental attachment and sibling relationships on life satisfaction in emerging adults. *Journal of Social and Personal Relationships, 36*(6), 1747–1763. https://doi.org/10.1177/0265407518771741

Portu-Zapirain, N. (2013). Attachment relationships with fathers and mothers during early childhood. *Psychology, 4*(3A), 254-260. https://doi.org/10.4236/psych.2013.43A038

Potard, C., Combes, C., & Labrell, F. (2020). Suicidal ideation among French adolescents: Separation anxiety and attachment according to sex. *Journal of Genetic Psychology, 181*(6), 470-488. https://doi.org/10.1080/00221325.2020.1822773

Potard, C., Courtois, R., Réveillère, C., Bréchon, G., & Courtois, A. (2017). The relationship between parental attachment and sexuality in early adolescence. *International Journal of Adolescence and Youth, 22*(1), 47-56. https://doi.org/10.1080/02673843.2013.873065

Pressel, A. S. (2007). *Family and child-level moderators of the relationship between marital conflict and early adolescent peer social competence* [Unpublished dissertation]. University of North Carolina at Chapel Hill.

Prijatna, K. & Sanjaya, E. L. (2021). Regulasi Emosi Remaja Ditinjau dari Kelekatan Ayah, Ibu, Teman dan Kepribadian (Hardiness) [Adolescent emotion regulation reviewed from the attachment to father, mother, friends and personality (Hardiness)]. *Jurnal Konseling Andi Matappa, 5*(2), 81-91. https://doi.org/10.31100/jurkam.v5i2.1108

Profe, W. B. (2016). *Adolescent responses to the distress of others: The influence of multiple attachment figures via emphatic concern* [Unpublished master thesis]. University of Cape Town.

Profe, W. B., Wild, L. G., & Treaux, C. (2016). *Adolescent responses to the distress of others: The influence of multiple attachment figures via emphatic concern*. *Journal of Social and Personal Relationships, 38*(5), 1671–1691. https://doi.org/10.1177/02654075211000433

Psychogiou, L., Nath, S., Kallitsoglou, A., Dimatis, K., Parry, E., Russell, A. E. … Moberly, N. J. (2018). Children’s emotion understanding in relation to attachment to mother and father. *British Journal of Developmental Psychology, 36*(4), 557–572. https://doi.org/10.1111/bjdp.12239

Purkait, D. (2019). A study on gender and class difference in parent and peer attachment and it’s relation with achievement motivation of adolescent. *International Journal of Home Science, 5*(1), 137-141.

Raboteg-Šarić, Z., Merkaš, M., & Miljević, T. (2018). Family relations and relationships with peers as determinants of self-esteem in adolescents. *Central European Journal of Paediatrics, 14*(2), 190-200. https://doi.org/10.5457/p2005-114.218

Raiffe, D. E., & Murphy, D. P. (2016). The role of attachment on adult attitudes toward interacting with children. *Psi Chi Journal of Psychological Research, Fall*, 162-169.

Raissachelva, E. P., & Handayani, E. (2020). Hubungan antara Kelekatan pada Orang Tua dan Teman Terhadap *Subjective Well-being* Remaja yang Ditinggalkan Orang Tua Bekerja Sebagai Pekerja Migran [The relationship between attachment to parents and friends to subjective bell-being of teens left behind by parents working as migrant workers]. *Jurnal Psikologi Sains dan Profesi, 4*(1), 12–22.

Rajtora, G. (2012). *Beziehungen zu Eltern und Gleichaltrigen, Schulfreude und Freizeitverhalten bei Ganztags- undHalbtagsschülern im Vergleich einer entwicklungspsychologischen Untersuchung* [Relationships with parents and peers, school joy and leisure activities in all-day and half-day students in comparison of a developmental psychological examination] [Unpublished magister thesis]. University of Vienna. https://doi.org/10.25365/thesis.21141

# Rangarajan, S. (2008). Mediators and moderators of parental alcoholism effects on offspring self-esteem. *Alcohol & Alcoholism, 43*(4), 481–491. https://doi.org/10.1093/alcalc/agn034

# Rashwan, M. R., Gregg, D. H., Somers, C. L., Hoffman, A., Yoon, J., & Barnett, D. (2017). Adolescent attachment in multiple contexts: Associations with emotional and behavioral functioning in the United States Midwest. *Social Development Issues, 39*(1), 54-67.

# Rasmussen, P. D., Elmose, M., Lien, G., Musaeus, A., Kirubakaran, R., Ribero, J. P., & Storebǿ, O. J. (2022). Remarkable high frequency of insecure attachment in children with ADHD persists in a three-year follow-up. *Nordic Journal of Psychiartry, 76*(5), 323-329. https://doi.org/10.1080/08039488.2021.1969428

Ratner, K. (2013). *The role of parenting and attachment in identity style development* [Unpublished Honors thesis]. University of Central Florida.

Rehman, R. S., & Butt, Y. (2016). Parental attachment and peer attachment bonds with the identity development during late adolescence. *Sociology and Criminology – Open Access, 4*(2), 100154. https://doi.org/10.4172/2375-4435.100015

Reigstad, B., Jørgensen, K., Sund, A. M., & Wichstrøm, L. (2006). Adolescents referred to specialty mental health care from local services and adolescents who remain in local treatment: What differs? *Social Psychiatry & Psychiatric Epidemiology, 41*(4), 323–331. https://doi.org/10.1007/s00127-005-0027-x

Reinert, D. F., & Edwards, C.E. (2012). Sex differences in religiosity: The role of attachment to parents and social learning. *Pastoral Psychology, 61*(2), 259–268. https://doi.org/10.1007/s11089-011-0376-1

Remtulla, Y., Charles, G., & Marshall, S. (2012). An analysis of responsibility, attachment security, and relationship efficacy among young carers. *Relational Child and Youth Care Practice, 25*(2), 49-57.

Ribeiro, R. A. (2020). *Estilos parentales, apego y tolerancia a la frustración: transmisión intergeneracional abuelos- padres- nietos* [Parental styles, attachment and tolerance to frustration: intergenerational transmission grandparents- parents- grandchildren] [Unpublished doctoral dissertation]. Universidad Ramon LLull.

Riggio, H. R. (2004). Parental marital conflict and divorce, parent-child relationships, social support, and relationship anxiety in young adulthood. *Personal Relationships, 11*, 99–114. https://doi.org/10.1111/j.1475-6811.2004.00073.x

Riggio, H. R., & Valenzela, A. M. (2011). Parental marital conflict and divorce, parent – child relationships, and social support among Latino-American young adults. *Personal Relationships, 18*, 392 – 409. https://doi.org/10.1111/j.1475-6811.2010.01305.x

Robinson, B. A. (2010). *Emerging adults’ mental health: The influences of parental attachment bonds and identity formation processes* [Unpublished dissertation]. University of New Brunswick.

Robinson, J. (2014). *Adolescent peer group orientation, attachment/parenting styles and mental health* [Unpublished dissertation]. Deaking University.

Rocha, M. M. M. (2008). *O desenvolvimento das relações de vinculação na adolescência: Associações entre contextos relacionais com pais, pares e par amoroso* [The development of attachment relationships in adolescence: Associations between relational contexts with parents, peers and romantic partners]. [Unpublished dissertation]. Universityof Porto.

Röder, M., Hein, S., & Fingerle, M. (2015). The Child Attachment Interview: Application in a German-speaking sample and its correlations with personality and aggression. *Child Indicators Research, 8*(4), 789–799. https://doi.org/10.1007/s12187-014-9273-3

Rodrigues, G.A., Obeldobel, C.A., Kochendorfer, L.B., Brumariu, L.E., Fareri, D.S., & Kerns, K.A. (in press). Parent-child attachment security and depressive symptoms in early
adolescence: The mediating roles of gratitude and forgiveness. *Child Psychiatry & Human Development*. https://doi.org/ 10.1007/s10578-022-01394-9

Rodrigues, R. M. S. C. E. (2009). *Contributio ao Estudio das Relavoes Significantivas na delinquencia juvenile: Estuo Exploratorio no Inventory of Parent and Peer Attachment* [Contribution to the study of meanings of relationships in juvenile delinquency: Exploratory study with the Inventory of Parent and Peer Attachment] [Unpublished master thesis] University of Lisbon.

Roelofs, J., Meesters, C., & Muris, P. (2008). Correlates of self-reported attachment (in)security in children: The role of parental romantic attachment status and rearing behaviors. *Journal of Child & Family Studies, 17*(4), 555–566. https://doi.org/10.1007/s10826-007-9174-x

Root, R. (2006). *Predictors of educational attainment among Naskapi adolescents* [Unpublished doctoral dissertation]. McGill University.

Roring, S. A. (2012). *Attachment, negative self-schemas, and coping with separation-individuation during the transition to college* [Unpublished doctoral dissertation]. Oklahoma State University.

Rosenberg, T., & Shields, C. G. (2009). The role of parent–adolescent attachment in the glycemic control of adolescents with Type 1 Diabetes: A pilot study. *Families, Systems, & Health, 27*(3), 237-248. https://doi.org/10.1037/a0017117

Ross, J., & Fuertes, J. (2010). Parental attachment, interparental conflict, and young adults’ emotional adjustment. *The Counseling Psychologist, 38*(8), 1050–1077. https://doi.org/10.1177/0011000010376094

Rowen, J. (2014). *Examining parental denigration in family systems and its association with parent-child closeness, interparental conflict, and psychological well-being* [Unpublished dissertation] University of Virginia.

Ručević, S. (2010). Connection of affection with parents with risky and delinquent behavior in adolescents (in Croatian). *Drustvena Istrazivanja, 20*(1), 167-187.https://doi.org/10.5559/di.20.1.09

Ručević, S., & Ajdukovic, M. (2016). Problem behaviors, childhood victimization, and attachment quality in Croatian sample of community and referred psychopathic-like adolescents. *Criminal Justice and Behavior, 43*(4), 564-582. https://doi.org/10.1177/0093854815605526

Ručević, S., & Duvnjak, I. (2010). Povezanost reaktivne i proaktivne agresije, privrženosti i samopoštovanja adolescenata [Correlation between reactive and proactive aggression, attachment and self-esteem of adolescents]. *Psihologijske Teme,19*(1), 103-121.

Ryan, N. E., Solberg, V. S., & Brown, S.D. (1996). Family dysfunction, parental attachment, and career search self-efficacy among community college students. *Journal of Counseling Psychology, 43*(1), 84-89.https://doi.org/ 10.1037/0022-0167.43.1.84

Saeed, S., & Malik, F. (2022). Interpersonal relationship anxiety and psychological well-being: Moderating role of parental attachment in adolescents. *ASEAN Journal of Psychiatry, 23*(2), 1-10.

Safdar, S., & Zahrah, S.M. (2016). Impact of parenting styles on the intensity of parental
and peer attachment: Exploring the gender differences in adolescents. *American Journal of Applied Psychology, 4*(2), 23-30. https://doi.org/10.12691/ajap-4-2-1

Şahin, M., Dinç, G.S., Göker, Z., Çöp, E., Üneri, Ö., Mısırlıoğlu, E. D., & Kurt, F. (2019). Adolescence suicidal behavior and its relation with attachment patterns of the adolescents with their parents: A case-control study. *Klinik Psikofarmakoloji Bulteni, 29*(supl. 1), 92.

Samper-García, P., Malonda-Vidal, E., Llorca-Mestre, A., Muñoz-Navarro, R., & Mestre-Escrivá, V. (2021). Victimization and peer and parent attachment: The mediating effect of regulatory emotional self-efficacy. *International Journal of Environmental Research and Public Health, 18*, 2062. https://doi.org/10.3390/ijerph18042062

Samuolis, J., Layburn, K., & Schiaffini, K.M. (2001). Identity development and attachment to parents in college students. *Journal of Youth and Adolescence, 30*(3), 373-384. https://doi.org/10.1023/A:1010448313516

Sanders, A., & Szymanski, K. (2013). Having a mentally ill sibling: Implications for attachment with parental figures. *Social Work in Mental Health, 11*(6), 516-529. https://doi.org/ 10.1080/15332985.2013.792312

# San Martini, P., Zavattini, G. C., & Ronconi, S. (2009). L'Inventario per l'Attaccamento ai Genitori ed ai Pari (IPPA - Inventory of Parent and Peer Attachment). Un'indagine psicometrica su un campione italiano di adolescenti [Inventory of Parent and Peer Attachment (IPPA). A psychometric survey of an Italian sample of adolescents]. *Giornale Italiano di Psicologia, 1*, 199-228. https://doi.org/10.1421/29288

# Santens, T., Claes, L., Diamond, D. S., & Bosmans, G. (2018). Depressive symptoms and self-harm among youngsters referred to child welfare: The role of trust in caregiver support and communication. *Child Abuse and Neglect, 77*, 155-167. https://doi.org/10.1016/j.chiabu.2018.01.001

Santona, A., De Cesare, P., Tognasso, G., De Franceschi, M., & Sciandra, A. (2019). The mediating role of romantic attachment in the relationship between attachment to parents and aggression. *Frontiers in Psychology. 10*, 1824. https://doi.org/10.3389/fpsyg.2019.01824

Santos, C.I.O. (2021). *Relações entre a autoestima e a vinculação ao pai, à mãe e aos pares, em adolescentes dos 15 aos 18 anos* [Relationships between self-esteem and attachment to father, mother and peers in adolescents aged 15 to 18 years] [Unpublished master thesis]. Universidade Fernando Pessoa.

Sanyal, N., Saahithi, P., & Fernandes, T. (2017). Influence of extracurricular activities on
attachment, emotion regulation and career aspirations in adolescents. *IRA International Journal of Education and Multidisciplinary Studies, 8*(1), 53-74. https://doi.org/10.21013/jems.v8.n

Sarigiani, P. A., Trumbell, J. M., & Camarena, P. M. (2013). Electronic communications technology and the transition to college: Links to parent-child attachment and adjustment. *Journal of the First-Year Experience & Students in Transition, 25*(1), 35–60.

Sarracino, D., Presaghi, F., Degni, S., & Innamorati, M. (2011). Sex-specific relationships among attachment security, social values, and sensation seeking in early adolescence: Implications for adolescents’ externalizing problem behaviour. *Journal of Adolescence, 34*(3), 541–554. https://doi.org/10.1016/j.adolescence.2010.05.013

Savasuk, R. (2013). *College students' recollection of parent-child conflict management and current perceptions of adjustment and attachment with parents and peers* [Unpublished master thesis]. Florida State University.

Saylık, F. Z., & Gezici-Yalçın, M. (2018). Otoriter veya demokratik ebeveyn tutumunun ve ebeveyne bağlanma biçiminin suçluluk ve utanç duygularına etkisinin yarı-deneysel yöntemle incelenmesi [Investigation of the effects of authoritarian vsdemocratic parental attitudes, and parental attachment on shame and guilt by quasi-experimental method]. *Psikoloji Çalışmaları - Studies in Psychology, 38*(2), 95-127. https://doi.org/10.26650/SP404167

Scharfe, E. (2020). Hitting the bull’s eye: Attachment representations and the organization
of social networks. *Interpersona, 14*(1), 15–27. https://doi.org/10.5964/ijpr.v14i1.3919

Schneider, B. H., & Younger, A. J. (1996). Adolescent-parent attachment and adolescents’ relations with their peers. *Youth and Society, 28*(1), 95-108. https://doi.org/10.1177/0044118X96028001004

Schultheiss, D. E. P., & Blustein, D. L. (1994). Role of adolescent–parent relationships in college student development and adjustment. Journal of Counseling Psychology, 41(2), 248–255. doi10.1037/0022-0167.41.2.248

Schwartz, J. P., & Buboltz, W. C. (2004). The relationship between attachment to parents and psychological separation in college students. *Journal of College Student Development, 45*(5), 566-577. https://doi.org/10.1353/csd.2004.0062

Seah, E. J. I. (2015). *Patterns of attachment and reflective functioning in families of adolescents with eating disorders*. [Unpublished doctoral dissertation]. Curtin University.

Sekmen, E., Kalalök, Z.S., Göker, Z., Cöp, E., Dinc, G., Bozkurt, E.H., & Üneri, Ö.S. (2017). Alexithymia, self-esteem, and attachment styles of adolescents with migraine and tension type headaches. *Symposium on Child and Adolescent Psychopharmacology Abstracts, 27*, 73-74.

Selby, J. C. (2000). *The relationship of parental attachment, peer attachment, and self-concept to the adjustment of first-year college students* [Unpublished doctoral dissertation]. University of North Texas.

Selçuk, S., İşcanoğlu, Z., Sayıl, M., Sümer, N., & Berument, S. K. (2020). Factors influencing children’s appraisals of interparental conflict: The role of parent-child relationship quality. *Journal of Family Issues, 41*(11), 2022–2044. https://doi.org/10.1177/0192513X20910765

Seon, Y. (2016). Moderation and moderated mediation by paternal attachment on the relationships among maternal attachment, peer relational skills, and well-being in children. *Asian Journal of Education, 17*(3), 49-80.

Seon, Y. (2021). Self‐esteem as a mediator of parental attachment security and social anxiety. *Psychology in the Schools, 58*(8), 1545-1556. https://doi.org/10.1002/pits.22511

Seong, D. G., & Kim, C. K. (2015). The effects of parental attachment, peer attachment, and teacher attachment on children’s happiness in elementary school students in higher grades: With a focusing on the mediating effect of self-regulation abilities (in Korean). *Korean Journal of Child Studies, 36(*4), 129-142. https://doi.org/10.5723/KJCS.2015.36.4.12

Sevinç, G., & Şener-Kılınç, T. (2018). Güvenli bağlanma düzeyi ve benlik kurguları ile üniversiteye yeni başlayan öğrencilerin uyumu arasındaki ilişki [The relationship between attachment security, self-construals and university adjustment of freshmen]. *Eğitimde Kuram ve Uygulama, 14*(3), 306-324. https://doi.org/10.17244/eku.377465

Seymenler, S., & Siyez, D. M. (2016). Career locus of control in adolescence; The role of gender perception and attachment to parents (in Turkish). *Journal of Research in Education and Teaching, 5*(4), 286-300.

Shaftall, A. H., Mathias, C. W., Furr, R. M., & Dougherty, D. M. (2013), Adolescent attachment security, family functioning, and suicide attempts. *Attachment & Human Development; 15*(4), 368-383. https://doi.org/10.1080/14616734.2013.782649

Sharafat, A., & Zubair, A. (2013). Perceived parental attachment and emotional empathy among adolescents. *FWU Journal of Social Sciences, 7*(1), 6-14.

Shayeghian, Z., Moeineslam, M., Hajati, E., Karimi, M., Amirshekari, G., & Amiri, P. (2020). The relation of alexithymia and attachment with type 1 diabetes management in adolescents: A gender-specific analysis. *BMC Psychology, 8*, 30.https://doi.org/10.1186/s40359-020-00396-3

Shepherd, D., Goedeke, S., Landon, J., Taylor, S., & Williams, J. (2021). The impact of sibling relationships on later‑life psychological and subjective well‑being. *Journal of Adult Development*, *28*, 76-86. https://doi.org/10.1007/s10804-020-09350-4

Shi, X., Wang, B., He, T., Wu, L., & Zhang, J. (2020). Secure attachments predict prosocial behaviors: A moderated mediation study. *PsyCh Journal, 9*(5), 597-608. https://doi.org/10.1002/pchj.348

Shimotomai, A. (2020). Parental social power, co-parenting, and child attachment: early to late Japanese adolescence transitions*. Current Psychology, 39*, 953–964. https://doi.org/10.1007/s12144-018-9811-0

Shmueli-Goetz, Y., Target, M., Fonagy, P., & Datta, A. (2008). The child attachment interview: A psychometric study of reliability and discriminant validity. *Developmental Psychology, 44*(4), 939-956. https://doi.org/10.1037/0012-1649.44.4.939

Shyan, T.P., & Arshat, Z. (2019). Parental attachment, smartphone addiction and stress among undergraduate students. *International Journal of Education, Psychology and Counseling, 4*(32), 149-163. https://doi.org/10.35631/IJEPC.4320015

Sieh, D. S., Visser-Meily, J. M. A., & Meijer, A. M. (2013). Differential outcomes of adolescents with chronically ill and healthy parents. *Journal of Child and Family Studies, 22*, 209–218. https://doi.org/10.1007/s10826-012-9570-8

Siffert, K. J. (2012). *A structural equation model investigating parental relationships and gendered functioning among men: Links to Kohut’s self psychology* [Unpublished doctoral dissertation]. University of Huston.

Silva, A. S. M. (2011). *Attachment and emotional intelligence* (in Portuguese). [Unpublished master thesis]. University of Porto.

Silva, M. d. G., & Costa, M. E. (2005). Vinculação aos pais e ansiedade em jovens adultos [Attachment to parents and anxiety in young adults]. *Psicologia, 18*(2), 9-32.

Silvestre, V. M. d. A. (2019). *Vinculação aos Pais e aos Pares, Memórias de Vergonha e Comportamento Antissocial na Adolescência* (Linking parents and peers, memories of shame and antisocial behavior in adolescence) [Unpublished master thesis]. Escola Superior de Educação de Viseu.

Sim, T. N., & Ng, E. L. (2007). Parental attachment and adjustment to higher learning institutions: The role of stress for a Malaysian sample of late adolescents. *Journal of Counseling & Development, 85*(4), 467-474.

Sim, T. N., & Yow, A. S. (2011). God attachment, mother attachment, and father attachment in early and middle adolescence. *Journal of Religion and Health, 50*(2), 264–278. https://doi.org/ 10.1007/s10943-010-9342-y

Simons, K. J., Paternite, C. E., & Shore, C. (2001). Quality of parent/adolescent attachment and aggression in young adolescents. *Journal of Early Adolescence, 21*(2), 182-203. https://doi.org/10.1177/0272431601021002003

Şimşek, H., & Çöplü, F. (2017). The relation between the school attachment levels and parent attachment levels of high school students. *TOJET: The Turkish Online Journal of Educational Technology, 2017*, 546-554.

Sira, N. (2003). *Body image: Relationship to attachment, Body Mass Index and dietary practices among college students* [Unpublished doctoral dissertation]. Virginia Polytechnic Institute.

Sira, N., & Ballard, S. M. (2009). An ecological approach to examining body-satisfaction in Caucasian and African American female college students. *Family & Consumer Sciences Research Journal, 38*(2), 208–226. https://doi.org/10.1111/j.1552-3934.2009.00021.x

Smith, L. (2011). *An exploration of the relationship between poor parent-child attachment and callous-unemotional traits in a sample of high-risk young offenders* [Unpublished doctoral dissertation]. University College London.

Smith, T. M. (2001). *The relationship between parental attachment and separation and self-esteem and wellbeing among White, Black and Hispanic Catholic high school students*. [Unpublished dissertation]. New York University.

Smith-Etxeberria, K., & Eceiza, A. (2021). Parental divorce, interparental conflict, and parent-child relationships in Spanish young adults. *Anales de Psicología, 37*(1), 1-9.
https://doi.org/10.6018/analesps.343041

Soares, A. F. L. (2012). *Relação entre a Qualidade de Vinculação e o Sentimento de Solidão em Adolescentes: Diferenças no Género* [Relationship between quality of attachment and sense of loneliness in adolescents: gender differences] [Unpublished master thesis]. ISPA Instituto Universario.

Sobral, M. P., Almeida, P. R., & Costa, M. E. (2010). Medo da intimidade, vinculação e divórcio parental: um estudo com jovens adultos [Fear of intimacy, attachment and parental divorce: a study with young adults]. *Actas do VII Simpósio Nacional de Investigação em Psicologia Universidade do Minho, Portugal, 4 a 6 de Fevereiro de 2010*. 993-1009.

Somers, C. L., & Paulson, S. E. (2000). Students’ perceptions of parent–adolescent closeness and communication about sexuality: Relations with sexual knowledge, attitudes, and behaviors. *Journal of Adolescence, 23*(5), 629–644. https://doi.org/10.1006/jado.2000.034

Song, H., Thompson, R. A., & Ferrer, E. (2009). Attachment and self-evaluation in Chinese adolescents: Age and gender differences. *Journal of Adolescence, 32*(5), 1267-1286. https://doi.org/10.1016/j.adolescence.2009.01.001

Song, I. A (2019). *The effects of adolescents’ parental attachment and hopeful thinking on psychological well-being* (in Korean) [Unpublished master thesis]. Ewha Womans University Graduate School.

Song, R., Fung, J. J., Wong, M. S., & Yao, P. (2020). Attachment as moderator of perceived social-class discrimination on behavioral outcomes among Chinese migrant children. *Journal of Early Adolescence, 40*(6) 745–771. https://doi.org/10.1177/0272431619870604

Soon, K. (2015). *Towards an explanatory model of socio-emotional functioning in children and adolescents with congenital dermatological disfigurement: The role of attachment and shame* [Unpublished doctoral dissertation]. University College London.

Sorokou, C. F., & Weissbrod, C. S. (2005). Men and women’s attachment and contact patterns with parents during the first year of college. *Journal of Youth and Adolescence, 34*(3), 221–228. https://doi.org/10.1007/s10964-005-4304-5

Sousa, A. F. B. (2010). *Influência da vinculação ao pai e à mãe nas motivações dos adolescentes para iniciar ou manter relações românticas* (Influence of the attachment to the father and mother on the motivations of adolescents to start or maintain romantic relationships) [Unpublished master thesis]. University of Lisbon.

Staley, S. K. (2011). *Childhood sexual abuse history: Attachment, mattering, and coping among young adults* [Unpublished doctoral dissertation]. Arizona State University.

Sternberg, K. J., Lamb, M. E., Guterman, E., Abbott, C. B., & Dawud-Noursi, S. (2005). Adolescents’ perceptions of attachments to their mothers and fathers in families with histories of domestic violence: A longitudinal perspective. *Child Abuse & Neglect, 29*(8), 853–869. https://doi.org/10.1016/j.chiabu.2004.07.009

Štětinová, I. (2018). *Citová vazba k rodičům a její vliv na osobní pohodu (well-being) adolescent* [Attachment to parents and its influence on adolescents' well-being] [Unpublished bachelor thesis]. Karl’s University of Prague.

Stylianou, I, Charalampous, K., & Stavrinides, P. (2019). Psychopathic traits and adolescents’ delinquency: A short-term longitudinal study. *European Journal of Developmental Psychology, 16*(4), 417-432. https://doi.org/10.1080/17405629.2018.1438887

Suarez-Colorado, Y., & Campo-Ariaz, A. (2020). Associação entre apego e risco de suicídio
em estudantes universitários [Association between attachment and suicidal risk in college students]. *Adolescência & Saúde, 17*(3), 71-78.

Subasi, H., & Yildiz, N. G. (2022). Attachment relationships and learned resourcefulness
levels of institutionalized adolescents. *Pegem Journal of Education and Instruction, 12*(1), 100-114. https://doi.org/10.47750/pegegog.12.01.1

Sümer, N. E. B. I., & Kağitçibaşi, C. (2010). Culturally relevant parenting predictors of attachment security: perspectives from Turkey. In P. Erdman & N. Kok-Mun (Eds.), *Attachment: Expanding the cultural connections* (pp. 157–180). Routledge.

Sümer, N., & Şendağ, M. A. (2009). Attachment to parents, self-perception and anxiety in middle childhood period (in Turkish). *Türk Psikoloji Dergisi, Haziran,* 24(63), 86-101.

Sun, Q., Wang, C. D. C., Du, S., Biderman, M. D., & Jiang, G. (2022). Separating the effect of attachment figure-domain units in IPPA-R using the correlated trait and correlated method minus one model. *Journal of Social and Personal Relationships, 39*(4), 974-995. https://doi.org/ 0.1177/02654075211049548

Sun, Y., Li, J.-B., Pijarhati, M., Oktaufik, M., & Vazsonyi, A.T. (2022). Parental attachment and externalizing behaviors among Chinese adolescents: The mediating role of self-control. *Journal of Child and Family Studies, 31*, 923-933. https://doi.org/10.1007/s10826-021-02071-6

Sund, A. M., & Wichstrom, A. (2012). Insecure attachment as a risk factor for future depressive symptoms in early adolescence. *Journal of the American Academy of Child and Adolescent Psychiatry, 41*(12), 1478-1485. https://doi.org/10.1097/00004583-200212000-00020

Sutlović, D., & Raboteg-Šarić, Z. (2016). Povezanost kvalitete privrženosti roditeljima s različitim aspektima perfekcionizma kod adolescenata [Connection of quality of affection parents with different aspects perfectionism in adolescents]. *Napredak, 157*(4), 413–435.

Syarif, N. R. H. (2017). Pengaruh kelekatan (attachment) terhadap kemandirian emosi pada mahasiswa perantauan Maluku Utara yang kuliah di Malang (The effect of attachment on emotional independence in North Maluku overseas students studying in Malang) [Undergraduate thesis]. Universitas Islam Negeri Maulana Malik Ibrahim.

Szkody, E., & McKinney, C. (2019). Social support versus emotion regulation: Mediators of attachment and psychological problems after social exclusion. *Journal of Social and Clinical Psychology, 38*(10), 882-905. https://doi.org/10.1521/jscp.2019.38.10.88**2**

Tambelli, R., Cimino, S., Marzilli, E., Ballarotto, G., & Cerniglia,
L. (2021). Late adolescents’ attachment to parents and peers and psychological
distress resulting from COVID-19. A study on the mediation role of
alexithymia. *International Journal of Environmental Research and Public Health, 18*, 10649. https://doi.org/10.3390/ijerph182010649

Tan, P. S., & Arshat, Z. (2019). Parental attachment, smartphone addiction and stress among undergraduate students. *International Journal of Education, Psychology and Counseling, 4*(32), 149-163. https://doi.org/10.35631/IJEPC.4320015

Tao, Y., Bi, X.-Y., & Deng, M. (2020). The impact of parent–child attachment on self-injury behavior: Negative emotion and emotional coping style as serial mediators. *Frontiers in Psychology, 11*, 1477. https://doi.org/10.3389/fpsyg.2020.01477

Talib, N.F.B., & Kutty, F.M. (2022). Ikatan Keibubapaan dan Perapatan Rakan Sebaya Terhadap Kesejahteraan Psikologi Belia Felda Chini, Pahang [*The parenting and peer attachment on the psychological well-being of Felda Chini youth, Pahang*]. *Malaysian Journal of Social Sciences and Humanities, 7*(4), e001449 https://doi.org/ 10.47405/mjssh.v7i4.1449

Target, M., Fonagy, P., & Shmueli-Goetz, Y. (2003). Attachment representations in school-age children: The development of the Child Attachment Interview (CAI). *Journal of Child Psychotherapy, 29*(2), 171–186. https://doi.org/10.1080/0075417031000138433

Taylor, A. M. (1997). *Parental attachment and adjustment to college for adolescent students in further education* [Unpublished dissertation]. University of London.

Tegegne, G., Dawed, S., & Mulugeta, E. (2020). The relationship between adolescents’ perceived attachment to parents and peers, and their substance use behavior. *IOSR Journal of Humanities and Social Science, 25*(1), 1-8. https://doi.org/10.9790/0837-2501040108

Teixera, M. F. C. (2018). *Vinculação aos pais e pares enquanto preditor de ansiedade social em adolescents* [Linking to parents and peers as a predictor of social anxiety in adolescents] [Unpublished doctoral dissertation]. Universade Portucalense.

Teng, Z., Griffith, M. D., Nie, Q., Xiang, G., & Guo, C. (2020). Parent–adolescent attachment and peer attachment associated with Internet Gaming Disorder: A longitudinal study of first-year undergraduate students. *Journal of Behavioral Addictions, 9*(1), 116-128. https://doi.org/10.1556/2006.2020.00011

Teymoori, A., & Shahrazad, W. (2012). Relationship between mother, father, and peer attachment and empathy with moral authority. *Ethics & Behavior, 22*(1), 16-29.https://doi.org/10.1080/10508422.2012.638820

Thøgersen, D.M., Elmose, M., Viding, E., McCrory, E., & Bjørnebekk, G. (2022). Behavioral improvements but limited change in callous-unemotional traits in adolescents treated for conduct problems. *Journal of Child and Family Studies, 31,* 3342-3358. https://doi.org/ 10.1007/s10826-022-02435-6

Tibbetts, G., & Scharfe, E. (2013). Oh, brother (or sister)! An examination of
sibling attachment, conflict, and cooperation in emerging adulthood. *Journal of Relationships Research, 6*, e8. https://doi.org/ 10.1017/jrr.2015.4

Touati, C. D., Miljkovitch, R., Sirparanta, A., & Deborde, A. S. (2022). The role of attachment to the foster parent with regard to suicidal risk among adult survivors of childhood maltreatment. *Child Abuse & Neglect, 128*, 104886. https://doi.org/10.1016/j.chiabu.2020.104886

Towsend, D. T. (2004). *Culture, parental attachment and trait anxiety: A comparison of Latino- and Caucasian Americans* [Unpublished master thesis]. University of Florida.

Traeden, H. M. (2013). *Attachment security as a mediator of the relationship between marital conflict and youth competence* [Unpublished doctoral dissertation]. University of Utah.

Trillo, V. M., & Redondo, L. M. (2013). The role of gender identity in adolescents’ antisocial behavior. *Psicothema, 25*(4), 507-513. https://doi.org/10.7334/psicothema2013.8

Tu, K. M., Marks, B. T., & El-Sheikh, M. (2017). Sleep and mental health: The moderating role of perceived adolescent-parent attachment. *Sleep Health, 3*(2), 90-97. https://doi.org/10.1016/j.sleh.2016.12.003

## Türktan, S. (2007). İstanbul ili 6.sınıf öğrencilerinde ebeveyne bağlanma ile özgüven ve akademik başarı arasındaki ilişkiler (Relationships between parent attachment and self-confidence and academic achievement in 6th grade students in Istanbul) (in Turkish) [Unpublished doctoral dissertation]. Marmara University.

Ullrich-French, S., Smith, A.L., & Cox, A.E. (2011). Attachment relationships and physical activity motivation of college students. *Psychology and Health, 26*(8), 1063–1080. https://doi.org/10.1080/08870446.2010.530123

# Urso, G. D., Symonds, J., & Pace, U. (2020). The role of psychoticism in the relationship between attachment to parents and homophobic bullying: A study in adolescence. *Sexologies, 29*(4), e103-110. https://doi.org/10.1016/j.sexol.2020.08.005

Utami, C., & Murti, H. A. S. (2017). Relationship between attachment to parents and intimacy in dating in early adulthood (in Indonesian). *Psikologika, 22*(1), 40-49.

# Uzaina & Srivastava, A. (2016). A study on risk taking behavior among adolescents and their attachment with parents and peers. *International Journal of Indian Psychology, 3*(4), 61-70.

# Uzun, Ö., Akdemir, D., Topcu, M., & Özsungur, B. (2019). Psikojenik Nöbet Tipinde Konversiyon Bozukluğu Olan Ergenlerde Çocukluk Çağı Travmaları, Bağlanma ve Aleksitimi [Childhood traumas, attachment and alexithymia in adolescents with psychogenic nonepileptic seizure type of conversion disorder]. *Türk Psikiyatri Dergisi, 30*(2), 109-117. https://doi.org/10.5080/u18398

Vagos, P., da Silva, D.R., & Macedo, S. (2022). The impact of attachment to parents and peers on the psychopathic traits of adolescents: A short longitudinal study. *European Journal of Developmental Psychology, 19*(2), 251-266. https://doi.org/10.1080/17405629.2021.1890020

Van Berkel, L. D., Solomon, E. D., & Clark, E. M. (2012). Security and similarity: Parent-child political attitude congruence as predicted by parental attachment. *Y Psi Chi, The International Honor Society in Psychology, 17*(3), 90-98.

van der Vorst, H., Engels, R. E., Meeus, W., & Deković, M. (2006). Parental attachment, parental control, and early development of alcohol use: A longitudinal study. *Psychology of Addictive Behaviors, 20*, 107–116. https://doi.org/10.1037/0893-164X.20.2.107

van Eijck, F. E. A. M., Branje, S. J. T., Hale III, W. W., & Meeus, W. H. J. (2012). Longitudinal associations between perceived parent-adolescent attachment relationship quality and generalized anxiety disorder symptoms in adolescence. *Journal of Abnormal Child Psychology, 40*(6), 871–883. https://doi.org/10.1007/s10802-012-9613-z

van Laere, E. (2020). *De Rol van de secure base en safe Heaven Functies van Hechting in de Identiteits-Ontwikkeling van Jongeren: De Medierende Rol van Coping* [The role of the secure base and safe heaven function of attachment in adolescent identity development: The mediating role of coping] [Unpublished master thesis]. University of Gent.

Varanda, A. I. S. (2020). *Beyond linking: The role of social acceptance in the relationship between linkage and self-esteem* (in Portuguese) [Unpublished master thesis]. ISPA University Institute.

Vaz, M. S. d. S. (2011). *Link to mother, father and peer group and its relationship to juvenile delinquency* [Unpublished master thesis]. ISPA–Institute of Applied Psychology.

Vega, V., Sanchez, M., & Roitman, D. (2011). *Tipos de apego en una muestra de adolescentes con y sin trastornos de la conducta alimentaria* [Types of attachment in a sample of adolescents with and without eating disorders. Paper presented at the 3rd International Congress of Research and Professional Practice in Psychology, Buenos Aires, Argentina. Retrieved January 10, 2021, from <https://www.aacademica.org/000-052/321.pdf>

Vekony, A., van Aggelen-Gerrits, M. H., van Aken, M. A. G., & Goudena, P. P. (2004). De relatie tussen zelfwaardering en gehechtheid aan ouders bij zevenjarige kinderen [The relationship between self-esteem and attachment to parents in seven-year-olds children]. *Pedagogiek, 24*(2), 124-137.

Vellet, N. S. (1996). *The intergenerational transmission of attachment experiences: Mothers' representations of self in relation to others* [Unpublished dissertation]. University of Windsor.

Venta, A. (2020). Attachment facilitates acculturative learning and adversity moderates: Validating the Theory of Epistemic Trust in a natural experiment. *Child Psychiatry & Human Development, 51*(3), 471–477. https://doi.org/10.1007/s10578-020-00958-x

Venta, A., Cooper, E. B., Shmueli-Goetz, Y., & Sharp, C. (2018). Artificial neural network coding of the child attachment interview using linguistic data. *Attachment & Human Development, 20*(1), 62-83. https://doi.org/10.1080/14616734.2017.1378239

Venta, A., & Sharp, C. (2015). Mentalizing mediates the relation between attachment and peer problems among inpatient adolescents. *Journal of Infant, Child, and Adolescent Psychotherapy, 14*(3), 323-340. https://doi.org/10.1080/15289168.2015.1071997

Venta, A., Sharp, C., & Newlin, E. (2015). A descriptive study of symptom change as a function of attachment and emotion regulation in a naturalistic adolescent inpatient setting. *European Child & Adolescent Psychiatry, 24*(1), 95-104. https://doi.org/10.1007/s00787-014-0532-0

Venta, A., Long, T., Bailey, C., Galicia, B., Abate, A., Walker, J., & Salinas, K. (2021). Measurement invariance of the Inventory of Peer and Parent Attachment among Latinx and Non-Latinx college students. *Journal of Latinx Psychology, 9*(3), 179-188. https://doi.org/10.1037/lat0000188

Venta, A., Shmueli-Goetz, Y., & Sharp, C. (2014). Assessing attachment in adolescence: A psychometric study of the Child Attachment Interview. *Psychological Assessment, 26*(1), 238 –255. https://doi.org/10.1037/a0034712

Veppo, F. F. C. (2016). *COMO OS NOSSOS PAIS? Uma investigação transcultural sobre Vinculação Parental e Amorosa* [LIKE OUR PARENTS? A cross-cultural investigation into parental and loving bBonding] [Unpublished dissertation]. University of Coimbra.

Veppo, F., Perpétuo, C., Ribeiro, O., & Veríssimo, M. (2020). Social acceptance and health behaviors: Attachment as moderator variable (in Portuguese). *Psicologia, Saude & Doencas, 21*(1), 38-41. https://doi.org/10.15309/20psd210107

Verschueren, K., & Marcoen, A. (1999). Representation of self and socioemotional competence in kindergartners: Differential and combined effects of attachment to mother and to father. *Child Development, 70*(1), 183–201. https://doi.org/10.1111/1467-8624.00014

Verschueren, K., & Marcoen, A. (2002). Perceptions of self and relationship with parents in aggressive and nonaggressive rejected children. *Journal of School Psychology, 40*(6), 501–522. https://doi.org/10.1016/S0022-4405(02)00122-X

Verschueren, K., & Marcoen, A. (2005). Perceived security of attachment to mother and father: Developmental differences and relations to self-worth and peer relationships at school. In K. A. Kerns & R. A. Richardson (Eds.), Attachment in middle childhood (p. 212–230). Guilford Press.

Vignoli, E. (2009). Inter-relationships among attachment to mother and father, self-esteem, and career indecision. *Journal of Vocational Behavior, 75*(2), 91-99. https://doi.org/10.1016/j.jvb.2009.04.007

Vignoli, V., Croity-Belz, S., Chapeland, V., de Fillipis, A., & Garcia, M. (2005). Career exploration in adolescents: The role of anxiety, attachment, and parenting style. *Journal of Vocational Behavior, 67*(2), 153-168. https://doi.org/10.1016/j.jvb.2004.08.006

# Voss, K. (1999). *Understanding adolescent antisocial behaviour from attachment theory and coercion theory perspectives* [Unpublished dissertation]. Concordia University.

# Voulgaridou, I., & Kokkinis, M. (2020). The mediating role of friendship jealousy and anxiety in the association between parental attachment and adolescents’ relational aggression: A short-term longitudinal cross-lagged analysis. *Child Abuse & Neglect, 109*, 104717. https://doi.org/10.1016/j.chiabu.2020.104717

Wagler, K. (2019). *Parental attachment, intolerance of uncertainty, and error-related negativity: Three proposed risk factors for college student suicidal ideation* [Unpublished Honors thesis]. Florida State University.

Wahab, R., Mansor, M., Madon, Z., Azam, M. N. D., Talib, M. A., & Yaacob, S. N. (2013). Correlational analysis on the attachment and emotional intelligence among delinquents in rehabilitation centers in Malaysia. *Archives Des Sciences, 66*(4), 90-100.

Wallis, A., Miskovic-Wheatley, J., Madden, S., Rhodes, P., Crosby, R. D., Cao, L., & Touyz, S. (2018). Family functioning and relationship quality for adolescents in family-based treatment with severe anorexia nervosa compared with non-clinical adolescents. *European Eating Disorders Review, 26*(1), 29–37. https://doi.org/10.1002/erv.2562

Wang, D., Ding, W., Xie, R., Wu, W., Wang, Z., Li, X., & Li, W. (in press). The longitudinal influence of mothers’ co-parenting on school adjustment of left-behind children with absent fathers in China: The mediating role of parent–child attachment. *Journal of Child & Family Studies*. https://doi.org/10.1007/s10826-022-02273-6

Wang, F., Wang, M., Wang, T., & Wang, Z. (2021). Harsh parental discipline, parent-child attachment, and peer attachment in late childhood and early adolescence. *Journal of Child and Family Studies, 30*(1), 196–205. https://doi.org/10.1007/s10826-020-01860-9

Wang, H., Han, Z.R., & Li, X. (2020). Attachment experience and cortisol recovery from romantic conflict among young Chinese couples: A dyadic analysis. *International Journal of Psychology*, *55*(1), 22–32. https://doi.org/10.1002/ijop.12539

Wang, L., Han, R., & Jiang, S.-y. (2018). Mediation effect of perceived social support on correlation between parental attachment and depression of children (in Chinese). *Chinese Journal of Public Health, 34*(12), 1627-1630.

Wang, M. (2009). *Parental rearing, attachment quality and social anxiety among Chinese adolescents* [Unpublished master thesis]. Stockholm University.

Wang, Q. (2022). Exposure to secondhand smoke at home and psychological distress among college students in China: The role of parental attachment. *Journal of Psychoactive Drugs, 54*(2), 167-176. https://doi.org/10.1080/02791072.2021.1953641

Way, N., & Pahl, P. (2001). Individual and contextual predictors of perceived friendship quality among ethnic minority, low-Income adolescents. *Journal of Research in Adolescence, 11*(4), 325-349. https://doi.org/10.1111/1532-7795.00015

Weber, T. D. (2017). How adolescent’s family satisfaction and attachment quality correlate in cases of domestic violence. *International Journal of Developmental and Educational Psychology, 2*(1), 145-156.

Webster, D. R. (2002, August). *Perceptions of parent-child attachments: Relationships with explanatory style and empathy*. Poster presented at the 110th Annual Convention of the American Psychological Association at Chicago, Illinois. Retrieved January 3, 2021, from <https://files.eric.ed.gov/fulltext/ED475260.pdf>

Wei, J., Fang, J., Du, Y., Liu, Y., & Liu, H. (2021). Influence of personality factors and parent-child attachment on the externalized sexual behavior problems of Ningxia Hui Autonomous Region eco-immigrant adolescents [in Chinese]. *China Medical Hearld, 18*(24), 56-59.

Weierbach, G. (2014). *Predictors of well-being and growth following exposure to interpersonal violence among emerging adults* [Unpublished master thesis]. Western Carolina University.

Wells, Y. D., & Johnson, T. M. (2001). Impact of parental divorce on willingness of young adults to provide care for parents in the future. *Journal of Family Studies,7*(2), 160-170. https://doi.org/10.5172/jfs.7.2.160

Wibowo, N. R., & Wimbarti, S. (2019). The perception of attachment effect in parents and peers on aggressive behavior in male adolescents. *Psikohumaniora: Jurnal Penelitian Psikologi*, *4*(1), 53-64. https://doi.org/10.21580/pjpp.v4i1.3118

Wilkinson, R. (2006). Age and sex differences in the influence of attachment relationships on adolescent psychological health. *Australian Journal of Educational and Developmental Psychology, 23*(2), 87-104.https://doi.org/ 10.1017/S081651220002900X

Wilkinson, R. B. (2010). Best friend attachment versus peer attachment in the prediction of adolescent psychological adjustment. *Journal of Adolescence, 33*(5), 709–717. https://doi.org/10.1016/j.adolescence.2009.10.013

Wilkinson, R. B., & Goh, D. Y. L. (2014). Structural, age, and sex differences for a short form of the Inventory of Parent and Peer Attachment: The IPPA-45. *Journal of Relationships Research, 5*, e5. https://doi.org/10.1017/jrr.2014.5

Wilkinson, R. B., & Parry, M. M. (2004). Attachment styles, quality of attachment relationships, and components of self-esteem in adolescence. *Proceedings of the 39th Australian Psychological Society Annual Conference* (pp. 301-305). The Australian Psychological Society.

Williams, S. K., & Kelly, F. D. (2005). Relationships among involvement, attachment, and behavioral problems in adolescence: Examining father’s influence. *Journal of Early Adolescence, 25*(2), 168-196. https://doi.org/10.1177/0272431604274178

Williams, R., Leone, L., Faedda, N., Natalucci, G., Bellini, B., Salvi, E. … Guidetti, V. (2017). The role of attachment insecurity in the emergence of anxiety symptoms in children and adolescents with migraine: An empirical study. *The Journal of Headache and Pain, 18*, 62. https://doi.org/10.1186/s10194-017-0769-3

Woodhouse, S. S., Ramos-Marcuse, F., Ehrlich, K. B., Warner, S., & Cassidy, J. (2010). The role of adolescent attachment in moderating and mediating the links between parent and adolescent psychological symptoms. *Journal of Clinical Child and Adolescent Psychology, 39*(1), 51-63. https://doi.org/10.1080/15374410903401096

Worobec, L. (2016). *Self-criticism and self-compassion in university students: Origins and psychological correlates* [Unpublished master thesis]. University of Manitoba.

Wright, S. L., & Lyon, A. R. (2021). How parental attachment influences college students’ social domains. *Journal of College Student Retention: Research, Theory & Practice, 23*(3), 523-538. https://doi.org/10.1177/1521025119853827

Wristen, A. J. (1996). *Congruence of attachment across relationships* [Unpublished master thesis]. Texas Tech University.

Wu, C.-L., An, C. P., Tseng, L. P., Chen, H.-C., Chan, Y. C., Cho, S.-L., & Tsai, M.-L. (2015). Fear of being laughed at with relation to parent attachment in individuals with autism. *Research in Autism Spectrum Disorders, 10*, 116-123.https://doi.org/ 10.1016/j.rasd.2014.11.004

Wu, C.-L., Huang, Y. T., Wang, P. Y., & Chen, H. C. (2019). Parent–child attachment as a mediator of the relationship between parenting style and gelotophobia among adolescents. *International Journal of Psychology, 54*(4), 548-556. https://doi.org/10.1002/ijop.12493

Wu, W., Xie, R., Ding, W., Wang, D., Zhu, L., Ding, D., & Li, W. (2021). Fathers’ involvement and left-behind children’s mental health in China: The roles of paternal- and maternal-attachment. *Current Psychology*. https://doi.org/10.1007/s12144-021-01804-6

Wu, Y., Jang, C., & Cai, J. (2020). The effects of college students’ parental and peer attachment on depression: The mediating role of social support and
self-efficacy (in Chinese). *Advances in Psychology, 10*(3), 269-275. https://doi.org/10.12677/ap.2020.103034

Xia, M., Fosco, G.M., Bray, B.C., & Grych, J.H. (2022). Constellations of family closeness and adolescent friendship quality. *Family Relations, 71*(2), 644-659. https://doi.org/10.1111/fare.12606

Xiao, E., Jin, J., Hong, Z., & Zhang, J. (2022). The relationship between children and their maternal uncles: A unique parenting mode in Mosuo culture. *Frontiers in Psychology, 13*, 873137. https://doi.org/10.3389/fpsyg.2022.873137

Xie, Y., Wen, D., Liu, G., Lei, Q., & Liu, J. (2022). The relationship between parental attachment and suicidal ideation among junior high school students: The mediating role of negative emotion and the moderating role of gender. *International Journal of Arts and Social Science, 5*(9), 15-24.

Yang, Y., Zhu, L., Chen, Q., Song, P., & Wang, Z. (2016). Parent marital conflict and Internet addiction among Chinese college students: The mediating role of father-child, mother-child, and peer attachment. *Computers in Human Behavior, 59*, 221-229. https://doi.org/10.1016/j.chb.2016.01.041

Yasar, Z. N. (2019). *6-12 -year-olds level of attachment to their parents and the relationship to parents’ loss level* (in Turkish). Unpublished thesis, Kirklareli University.

Yau-Evans, P. S. W. (2001). *Anxiety in middle childhood* [Unpublished master thesis]. University of Tasmania.

Yavuz, M., Aluç, N., Tasa, H., Hamamcıoğlu, I., & Bolat, N. (2019). The relationships between attachment quality, metacognition, and somatization in adolescents: The mediator role of metacognition. *Journal of Child & Adolescent Psychiatric Nursing, 32*(1), 33–39. https://doi.org/10.1111/jcap.12224

Yildiz, M. A. (2016). Serial multiple mediation of general belongingness and life satisfaction in the relationship between attachment and loneliness in adolescents. *Educational Sciences: Theory and Practice, 16*(2), 553-578. https://doi.org/10.12738/estp.2016.2.0380

Yildiz, M. A. (2017). Adaptation of General Belongingness Scale into Turkish for adolescents: Validity and reliability studies. *Journal of Education and Training Studies, 5*(2), 223-231.

Yiri, P. (2020). *An investigation of the effect of family styles and attachment on attention deficit and hyperactivity* *in children in school age* [In Turkish] [ Unpublished master thesis]. Üskündar University.

Yoder, J.R., Leibowitz, G.S., & Peterson, L. (2018). Parental and peer attachment characteristics: Differentiating between youth sexual and non-sexual offenders and associations with sexual offense profiles. *Journal of Interpersonal Violence, 33*(17), 2643-2663.https://doi.org/ 10.1177/0886260516628805

Yoo S.-g., Lee H.-s., Hwang, M.-h., & Hong, S.-h. (2007). *A study on the structural model of parental attachment, gender roles, self-esteem and career barrier: Academically talented female students* (in Korean) [Unpublished master thesis]. Ewha Womens University.

Yu, G., Wang, Y., & Liu, C. (2012). Improving public service quality from a developmental perspective: Empathy, attachment, and gender differences. *Public Personnel Management, 41*(5), 9-20.

Yu, H.-q., & Zhou, Z.-q. (2002). 4th-6th graders’attachment to parents and its associations with peer relations (in Chinese). *Psychological* *Development and Education, 4*, 36-40.

Zaccagnino, M., Cussino, M., Preziosa, A., Veglia, F., & Carassa, A. (2015). Attachment representation in institutionalized children: A preliminary study using the Child Attachment Interview. *Clinical Psychology and Psychotherapy, 22*(2), 165-175. https://doi.org/10.1002/cpp.1882

Zachrisson, H. D., Røysamb, E., Oppedal, B., & Hauser, S. T. (2011). Factor structure of the Child Attachment Interview. *European Journal of Developmental Psychology, 8*(6), 744-759. https://doi.org/10.1080/17405629.2011.631293

Zagefka, H., Andrew, N., Boelen, B., Cummings, O., Denton, R., Harris, S. … Williams, R. (2022). Attachments to mother, father, and romantic partner as predictors of life
satisfaction. *The Family Journal: Counseling and Therapy for Couples and Families, 30*(4), 570-578. https://doi.org/10.1177/10664807211064147

Zaki, N.M., Bakr, O.A., & Mohamed, H.S. (2022). Effect of parent-adolescent attachment on their psychological wellbeing. *Egyptian Journal of Health Care, 13*(3), 228-242.

Zaman, W., & Fivush, R. (2013). Stories of parents and self: Relations to adolescent attachment. *Developmental Psychology, 49*(11), 2047–2056. https://doi.org/10.1037/a0032023

Zellmer, S. (2007). *Kontinuität der Bindung vom Vorschulalter bis zur mittleren Kindheit* [Continuity of attachment from preschool to middle childhood] [Unpublished doctoral dissertation]. Heinrich Heine University of Düsseldorf.

Zhai, Z. W. (2015). *The role of attachment to parents in the etiology of substance use disorder* [Unpublished dissertation]. University of Pittsburg.

Zhang, W., Liu, T., Li, X., & Zhang, S. (2021). Family relationships and DSM-5 personality domains in adolescence: A person- and variable-based approach. *Personality and Individual Differences, 172*, 110582. https://doi.org/10.1016/j.paid.2020.110582

Zhang, Y.-L., Yang, H., Liang, W., Zhang, Y.-L., & Yang, S.-C. (2011a). Relationship between childhood abuse experience, parent attachment and depression in adolescents (in Chinese). *Journal of Applied Clinical Pediatrics, 26*(6), 460-463.

Zhang, Y.-L., Zhang, Y.-L., Zhang, Y.-X., Wang, J.-L., & Hung, C.-Y. (2011b). Reliability and validity of Chinese version of Revised Inventory of Parent and Peer Attachment in junior students (in Chinese). *Chinese Mental Health Journal, 25*(1), 66–70.

Zhao, F., Liu, M., & Li, S. (2020). Paternal coparenting behavior and adolescent prosocial behaviors: Roles of parent-child attachment, peer attachment, and gender. *Children and Youth Services Review, 119*, 105629. https://doi.org/10.1016/j.childyouth.2020.105629

Zhou, J. (2014). *Relational entitlement and its associations with quality of romantic relationships* [Unpublished master thesis]. Towson University.

Zhuyue, Z. (2021). The relationship between parent attachment and behavior problems of adolescences during the epidemic of COVID-19: The mediating role of
resilience. *Advances in Social Science, Education and Humanities Research, 615*, 1140-1145.

Zia, A., & Shahzad, S. (2019). Depression and perceived attachment of adolescents with fathers having substance-abuse disorder. *Journal of the Pakistan Medical Association*, *69*(12), 1855-1859.

Zou, S., & Wu, X. (2020). Coparenting conflict behavior, parent–adolescent attachment, and social competence with peers: An investigation of developmental differences. *Journal of Youth and Adolescence, 49*(1), 267–282. https://doi.org/10.1007/s10964-019-01131-x

Zulkefly, S., & Wilkinson, F. B. (2015). Measuring specific attachment relationships of mother, father and peer in Malaysian adolescents. *Child Indicators Research, 8*(4), 767–788. https://doi.org/10.1007/s12187-014-9271-5

Zulkefly, S., & Wilkinson, F. B. (2017). *Attachment relationships and the psychological health of adolescents*. Paper presented at the Melaka International Conference on Social Sciences. Retrieved January 3, 2021, from <https://www.researchgate.net/profile/Farrah_Mustafar/publication/338499744_Prosiding_1_Melicoss'17/links/5e17de07299bf10bc3a0956a/Prosiding-1-Melicoss17.pdf#page=15>

Zulkefly, N. S., Wilkinson, R., & Baharudin, R. (2014, August). *Using the Inventory of Parent and Peer Attachment-Malay (IPPA-Malay) for assessment of attachment relationships and depression of Malaysian adolescents*. Paper presented at the International Social Development Conference, Langkawi Island, Malaysia. Retrieved January 3, 2021, from <http://repo.uum.edu.my/13243/1/53.pdf>

**Supplement III: Funnel Plots**

Mean-Level Differences Between Attachment with Fathers and Mothers

Correlation of Attachment with Mothers and Fathers (Fisher’s z-scores)
